# Supplementary material for: Mush Disaggregation in Basaltic Magma Chambers: Evidence from the ad 1783 Laki Eruption
Source: Oxford University Press journal article supplement (doi:10.1093/petrology/egs061), 2012-09-27
Supplement: egs061_Supplementary_Data.zip [file EA1.xls]

## Sheet: laki_only
Electronic Appendix 1
Data table for Laki whole-rock samples, including compositional data and summary of point-counting data.																																											Repeat counts	Mean counts					Standard deviations for counts
	Lava/tephra	Latitude	Longitude	Fissure #	Distance from Fissure row (km)	SiO2	Al2O3	FeOT	MgO	CaO	Na2O	K2O	TiO2	MnO	P2O5	Nb	Zr	Y	Sr	Rb	Zn	Cu	Ni	Cr	V	Ba	Sc	La	Ce	Pr	Nd	Sm	Eu	Gd	Tb	Dy	Ho	Er	Tm	Yb	Lu	Textural type	n	plg	ol	cpx	ves	gmass	Sig-plg
LAK01	L	64.0519	-18.4462	7	20.2	50.2307	14.0413	13.1504	5.74324	10.4907	2.72577	0.414398	2.68956	0.219269	0.294705	19.5561	181.189	40.2567	236.82	7.73559	126.653	97.6264	39.1823	62.1209	373.961	89.372	40.4038	13.464	33.8407	4.72917	22.3382	6.03084	1.95783	6.81232	1.10889	6.85437	1.34945	3.74139	0.564412	3.36059	0.496129	3	3	68	14	33	118	810	3.5
LAK02	L	64.052	-18.4454	7	20.2	50.0432	13.8947	13.3924	5.81068	10.5204	2.70145	0.413883	2.70553	0.223252	0.294611	19.6668	181.627	40.2306	235.498	7.58343	124.489	96.2651	38.459	63.1198	379.841	86.374	41.0721	13.2613	33.3256	4.66838	22.0499	5.9722	1.93306	6.76393	1.08751	6.75464	1.32712	3.73888	0.560698	3.33613	0.489733	2	3	83	10	39	99	807	15.1
LAK03	L	64.0519	-18.4462	7	20.2	50.2686	13.9307	13.1924	5.76442	10.4981	2.7321	0.414318	2.68306	0.22217	0.294226	19.4731	180.493	40.1783	236.246	7.71023	122.325	96.7456	39.6425	62.6204	374.259	87.9398	40.835	12.9335	32.3991	4.54476	21.3877	5.77561	1.88395	6.58931	1.06398	6.58302	1.28077	3.63052	0.549495	3.23745	0.471625	3	4	114	13	77	50	767	8.6
LAK04	L	64.0519	-18.4462	7	20.2	50.2771	13.981	13.2075	5.73788	10.4858	2.69721	0.413168	2.68508	0.221232	0.293965	19.7498	181.975	40.4528	233.229	7.65951	129.211	100.362	41.6479	69.2798	390.758	86.2785	43.8423	13.2104	33.0041	4.63878	21.8206	5.84945	1.91479	6.64335	1.0768	6.65419	1.28432	3.6742	0.557174	3.24352	0.483718	1	3	56	17	27	211	759	6.2
LAK05	L	64.0502	-18.452	7	20.2	50.1317	14.0222	13.3229	5.7433	10.4377	2.67817	0.41751	2.72603	0.223011	0.297348	20.0541	184.412	40.9888	233.353	7.78632	134.341	103.952	42.7328	68.7804	396.737	89.2002	44.7801	13.5661	33.8647	4.75892	22.4413	6.07743	1.97661	6.83573	1.11989	6.84394	1.33715	3.78949	0.570841	3.38185	0.495159	1	4	48	8	36	256	693	9.6
LAK06	L	64.0507	-18.4402	7	20.2	50.1915	13.8592	13.3329	5.78978	10.4902	2.69315	0.415573	2.71131	0.221908	0.294532	19.5285	181.885	40.4398	235.722	7.73559	123.598	98.694	39.9713	63.2863	375.524	90.8424	40.4469	13.3488	33.5601	4.71231	22.0658	6.00738	1.93712	6.72692	1.09118	6.7295	1.31621	3.72398	0.57278	3.33777	0.488307	2	3	148	9	33	117	723	7.6
LAKt07	T	64.0148	-18.4043	1	0.2	49.9933	13.5615	13.7041	5.8295	10.4178	2.72654	0.426276	2.80691	0.229924	0.304192	20.5245	188.072	41.6687	230.261	7.96384	136.25	99.8151	41.3302	54.5624	417.851	88.8564	46.2891	13.7123	34.2506	4.83202	22.6926	6.14986	1.99364	6.95734	1.13299	6.94748	1.3668	3.86749	0.578558	3.4706	0.508729	-1	-1	-1	-1	-1	-1	-1	-1
LAK08	T	64.0235	-18.3559	3	0.9	50.1386	13.8512	13.462	5.76039	10.3909	2.71374	0.418662	2.73896	0.225977	0.299621	19.8328	183.922	40.9366	234.276	7.73559	128.791	99.388	40.0809	56.5269	393.264	88.6273	43.4435	13.029	32.7702	4.62664	21.7095	5.91296	1.89828	6.63144	1.09056	6.67721	1.30716	3.70046	0.552358	3.28437	0.484732	1	3	24	3	24	184	829	4
LAK09	L	64.0229	-18.3538	3	0.9	50.2439	13.7029	13.5212	5.73985	10.358	2.71835	0.422405	2.76584	0.227371	0.30013	20.0541	185.778	41.4856	233.927	7.81168	129.071	99.1211	39.3357	54.2294	395.72	93.0002	42.6889	13.556	33.8969	4.7757	22.4404	6.07891	1.96843	6.91222	1.11668	6.84789	1.33708	3.8338	0.578655	3.40714	0.499666	2	3	22	7	24	292	682	5.5
LAK10	L	64.0779	-18.1952	6	1.9	50.223	13.7799	13.3826	5.73659	10.4715	2.74183	0.416838	2.72665	0.224607	0.296441	19.6253	183.69	41.0542	236.209	7.84972	119.792	95.3042	38.1522	57.0764	373.812	90.1932	40.7811	13.3082	33.319	4.70394	22.0569	5.93877	1.9366	6.71386	1.09609	6.70587	1.32207	3.72774	0.561315	3.30027	0.489921	2	3	68	17	43	107	791	8.3
LAK11	L	64.0779	-18.1952	6	1.9	50.3424	13.8416	13.3718	5.72027	10.4014	2.63314	0.41767	2.74714	0.224977	0.299633	20.0265	185.443	41.0411	233.253	7.96384	129.3	99.9752	40.6726	61.2552	395.348	87.5197	43.2495	13.4132	33.6949	4.77152	22.4025	5.98474	1.93185	6.78876	1.10127	6.82471	1.33482	3.78114	0.565503	3.37372	0.495626	1	3	40	4	29	274	694	7.8
LAK12	L	64.1265	-18.1198	7	0.6	50.3128	14.1505	13.0774	5.6743	10.5121	2.67085	0.412218	2.6769	0.218707	0.294298	19.5561	181.524	40.1521	236.346	7.78632	118.634	96.6388	39.1604	62.5205	368.478	89.773	41.1583	12.9383	32.3821	4.55753	21.4428	5.81961	1.8539	6.50163	1.05651	6.55446	1.27727	3.59527	0.542344	3.22339	0.473769	2	3	160	19	81	47	738	20.4
LAK13	L	64.1269	-18.1198	7	0.6	50.1876	13.7538	13.4868	5.71809	10.4039	2.72242	0.424049	2.77302	0.227711	0.302603	20.1786	186.886	41.2372	233.815	7.93848	128.639	96.532	39.3686	59.0908	390.262	90.3555	42.3871	12.6241	31.7286	4.45797	21.0332	5.65344	1.83595	6.38786	1.04992	6.35393	1.25974	3.5371	0.534989	3.13987	0.469549	2	3	42	10	20	268	728	4.6
LAK14	L	64.1279	-18.122	7	0.6	50.1546	13.8617	13.4071	5.71974	10.5031	2.65632	0.419312	2.74995	0.22594	0.302271	20.1095	185.443	41.1457	235.473	7.81168	129.606	102.805	40.6069	59.2906	395.422	91.2625	43.465	13.0115	32.6334	4.59932	21.662	5.83756	1.87776	6.59886	1.08049	6.60416	1.30065	3.65564	0.555371	3.2865	0.484367	2	3	45	6	37	360	581	15.8
LAK15	L	64.1215	-18.1197	7	0.6	50.1936	13.9287	13.3143	5.77333	10.4667	2.67471	0.413823	2.7171	0.22306	0.294722	19.7498	183.535	40.6751	234.775	7.81168	125.94	94.9305	40.2343	62.9533	386.292	89.4675	41.8051	13.3905	33.5786	4.73311	22.2037	5.9345	1.94237	6.75043	1.10367	6.73348	1.33036	3.73039	0.569669	3.3954	0.493898	2	3	62	8	32	295	654	8.4
LAK16	L	64.1162	-18.1307	7	1.2	50.336	13.8191	13.4185	5.70987	10.4074	2.61196	0.417104	2.75775	0.22475	0.297642	20.1648	185.958	41.0934	230.81	7.83704	131.388	96.9858	42.6233	65.5172	400.93	88.7037	44.6292	13.4548	33.7598	4.77695	22.5102	6.05199	1.97198	6.84665	1.11863	6.83453	1.35473	3.79882	0.569783	3.3606	0.500843	2	3	35	21	18	259	709	4
LAK17	L	64.0864	-18.1694	6	1.3	50.2191	13.7364	13.4484	5.74451	10.4107	2.74124	0.41824	2.75635	0.224741	0.300327	19.9435	185.546	41.4072	235.373	7.93848	123.98	99.5748	37.5385	52.6645	381.057	91.0334	41.4386	13.41	33.5413	4.74233	22.1872	6.00053	1.96998	6.81264	1.10134	6.78959	1.34802	3.76776	0.567201	3.36189	0.49587	2	3	65	9	38	160	732	11.2
LAK18	L	63.9606	-18.3955	1	4.3	50.2013	13.6785	13.4954	5.77154	10.3948	2.73972	0.422038	2.77094	0.225624	0.30016	20.151	186.113	41.3811	232.817	7.82436	128.779	100.883	38.7987	54.7122	391.167	88.9137	42.7428	13.7168	34.3455	4.85029	22.7781	6.19057	2.02847	6.97751	1.13694	6.99092	1.38247	3.90326	0.587391	3.45534	0.508283	1	3	33	3	30	268	716	3.5
LAK19	L	63.9606	-18.3955	1	4.3	50.3016	13.6324	13.5469	5.74155	10.3328	2.70428	0.421787	2.78803	0.226029	0.304736	20.3031	187.273	41.6164	229.887	7.96384	134.85	111.132	43.1493	59.7568	404.9	90.1168	45.125	13.7248	34.2694	4.82138	22.7172	6.16891	1.99599	6.93612	1.11997	6.82242	1.35612	3.80596	0.582345	3.41432	0.499282	1	3	25	5	9	371	618	2.3
LAK20	L	63.9603	-18.3958	1	4.3	50.235	13.694	13.4909	5.74949	10.3813	2.73881	0.418877	2.75995	0.227563	0.304088	20.0265	185.469	41.5641	235.199	7.91312	123.7	100.002	38.5467	53.8299	382.248	90.1359	42.1931	13.2655	33.3084	4.70096	22.1099	6.01631	1.95509	6.82562	1.10833	6.76707	1.34137	3.77045	0.575329	3.34154	0.49651	1	3	27	4	16	80	892	4.7
LAK21	L	64.0283	-18.3182	3	0.4	50.2669	13.5946	13.5838	5.78453	10.3295	2.69071	0.421243	2.79955	0.227753	0.301319	20.1648	187.918	42.0347	232.505	8.1921	124.235	99.6282	39.3795	55.8943	383.315	91.3389	43.5082	13.7022	34.3964	4.84224	22.8521	6.17366	1.99051	6.93361	1.13798	6.92203	1.36379	3.87907	0.588763	3.43771	0.508776	1	3	26	5	13	209	767	4.9
LAK22	L	64.0281	-18.318	3	0.4	50.2628	13.7466	13.4501	5.76306	10.3654	2.715	0.418857	2.75335	0.226082	0.298751	19.9988	185.314	41.2242	232.979	7.91312	128.74	102.591	40.322	57.1596	392.867	89.3147	42.7105	13.7395	34.3158	4.85082	22.7445	6.14055	1.983	6.94883	1.13576	6.91673	1.3643	3.84152	0.580192	3.44868	0.508086	2	3	35	4	25	345	657	5
LAKt23	T	64.0421	-18.3285	3	0.2	50.1396	13.7094	13.6297	5.72069	10.3378	2.71353	0.422218	2.79757	0.227815	0.301729	20.4138	188.769	42.1132	230.061	7.8624	137.472	102.004	41.7247	55.8277	420.159	87.978	47.1083	13.9811	35.0584	4.93007	23.1927	6.22572	2.01733	6.96941	1.15578	7.07528	1.38775	3.90118	0.591929	3.54434	0.520693	-1	-1	-1	-1	-1	-1	-1	-1
LAKt24	T	64.0421	-18.3285	3	0.2	50.2059	13.6907	13.6615	5.7239	10.2502	2.69957	0.422188	2.81222	0.225302	0.308522	20.8565	190.367	42.0086	228.765	7.88776	140.145	105.047	42.9082	56.8266	424.079	90.8042	46.6772	13.9172	34.7987	4.92933	23.0208	6.21782	2.00134	6.96239	1.13936	7.01356	1.3829	3.92008	0.588578	3.41893	0.507297	-1	-1	-1	-1	-1	-1	-1	-1
LAKt25	T	64.0421	-18.3285	3	0.2	50.1894	13.6007	13.6838	5.7697	10.2763	2.71813	0.419339	2.81008	0.225332	0.307179	20.5798	189.181	42.1132	228.341	7.96384	137.37	101.016	41.5055	53.7633	416.114	89.2384	46.1813	14.0655	35.1768	4.98298	23.3927	6.30231	2.05295	7.13579	1.16126	7.13671	1.39639	3.96799	0.591534	3.55165	0.525166	-1	-1	-1	-1	-1	-1	-1	-1
LAK26	L	63.9117	-17.7981	7	33.6	50.1689	13.9129	13.2975	5.78446	10.4724	2.71618	0.413463	2.71618	0.222324	0.295762	19.3901	182.181	40.6359	236.396	7.78632	117.26	97.4262	39.1823	60.8556	364.719	90.26	40.7811	13.5276	33.8517	4.772	22.5721	6.05123	1.97027	6.8615	1.11662	6.88669	1.34705	3.81819	0.573809	3.35114	0.505442	2	3	86	5	47	97	784	7.9
LAK27	L	63.8914	-17.7384	8	38.7	50.2017	14.0226	13.1341	5.78824	10.5195	2.71796	0.412727	2.68776	0.21945	0.295955	19.4178	181.679	40.309	236.296	7.58343	120.671	99.7083	39.4234	64.3851	373.043	89.773	39.8217	13.5165	33.8927	4.79638	22.4762	6.08388	1.97183	6.83717	1.11664	6.83142	1.34625	3.78765	0.571319	3.36501	0.50704	3	5	166	18	71	111	643	27.9
LAK28	L	63.8914	-17.7384	8	38.7	50.2313	14.2452	12.8816	5.80097	10.6435	2.70376	0.396484	2.59984	0.215897	0.281473	18.3111	173.893	38.8448	240.161	7.55806	111.15	96.3719	39.1604	63.7525	345.9	88.4363	39.175	12.89	32.2531	4.56093	21.4883	5.8332	1.92332	6.57776	1.07347	6.60394	1.2966	3.67146	0.553495	3.28202	0.483194	3	5	214	21	81	70	642	36.6
LAK29	L	63.8523	-17.8401	8	40	50.2003	13.8536	13.3425	5.74636	10.468	2.74258	0.412894	2.71445	0.222018	0.297364	19.5285	182.736	40.8058	237.119	7.73559	118.863	97.8399	36.9687	54.2627	367.039	90.0213	40.3391	13.6333	34.2275	4.81737	22.6296	6.16219	1.98144	6.9449	1.12712	6.89936	1.35108	3.83584	0.58072	3.43113	0.503049	2	4	114	14	52	59	784	12.3
LAK30	L	63.6256	-18.0209	4	69.2	50.3159	13.6111	13.4886	5.78598	10.3264	2.75236	0.423903	2.76642	0.231037	0.29834	20.051	186.312	41.2537	233.048	7.88593	128.875	102.23	39.376	57.4302	396.8	90.7187	42.5	13.9504	34.8981	4.92687	23.1999	6.27793	2.03104	7.04778	1.16097	7.1017	1.38796	3.9332	0.595926	3.54295	0.506701	1	3	27	6	14	195	793	4.5
LAK31	L	63.6467	-18.0064	4	68.4	50.3766	13.6186	13.5041	5.77483	10.3244	2.69157	0.422818	2.75886	0.228985	0.299287	20.0005	185.68	41.176	234.017	7.9111	123.975	98.553	37.1659	55.8876	389.375	89.565	42.225	13.7854	34.602	4.87875	22.9684	6.2232	2.02653	7.00561	1.13799	7.03107	1.37208	3.87817	0.592223	3.50753	0.508223	1	3	34	8	15	27	937	9.5
LAK32	L	63.6734	-18.3083	5	53.7	50.3586	13.758	13.3249	5.79123	10.3739	2.72943	0.422005	2.72037	0.226613	0.295101	19.7988	183.53	40.7098	234.654	7.76009	125	97.7921	38.4057	56.1152	387.275	87.2074	41.55	13.7672	34.3918	4.86648	22.7907	6.14724	2.01336	6.89455	1.13229	6.95152	1.35083	3.8457	0.577986	3.38132	0.49722	2	3	31	19	18	68	906	2.6
LAK33	L	63.6694	-18.3438	5	53.4	50.2996	13.7382	13.3887	5.8317	10.354	2.72952	0.41396	2.73153	0.221584	0.291081	19.471	183.327	41.0206	235.317	7.78526	116.275	100.354	37.112	55.7611	381.9	91.5213	42.525	13.5502	33.9171	4.7975	22.6522	6.08181	2.00019	6.96709	1.12026	6.94053	1.36216	3.85473	0.591764	3.4668	0.507271	1	3	30	9	19	16	960	6.5
LAK34	L	63.6345	-18.4254	5	60	50.3333	13.7035	13.4205	5.75928	10.3506	2.73868	0.426912	2.74472	0.225538	0.297026	19.9501	185.3	41.1242	234.807	7.73492	125.25	98.1218	37.8667	54.3449	392.35	90.6184	41.625	13.2291	33.1235	4.65215	22.1015	5.92939	1.92167	6.66295	1.08652	6.72675	1.31695	3.74832	0.562845	3.3628	0.490886	2	3	29	17	20	180	792	7.9
LAK35	L	63.6143	-18.3701	5	63.7	50.3668	13.667	13.4489	5.74817	10.3407	2.70325	0.424078	2.77259	0.227113	0.301477	20.1518	186.995	41.4869	232.742	7.78526	127.225	97.4117	38.0823	56.1657	394.125	94.4809	42.9	14.1861	35.3766	4.96542	23.3315	6.32563	2.0466	7.14514	1.16556	7.08207	1.39333	3.94479	0.603702	3.51955	0.516917	2	3	34	7	23	220	733	9.1
LAK36	L	64.1653	-18.0765	10	0.2	50.3352	13.5772	13.5833	5.63963	10.3059	2.76964	0.430498	2.81881	0.228796	0.311083	20.4796	191.472	42.4453	233.354	8.21311	124.6	101.191	36.4921	53.8391	391.375	94.3555	41.875	14.2703	35.7135	5.0227	23.7535	6.39164	2.06604	7.23767	1.17761	7.26458	1.42829	4.01031	0.605528	3.6491	0.530834	1	3	47	14	18	128	845	13.3
LAK37	T	64.1653	-18.0765	10	0.2	50.3739	13.8339	13.3599	5.68917	10.3375	2.71827	0.423403	2.74353	0.221302	0.299111	20.2527	186.312	41.0724	229.861	7.9866	133.75	121.733	46.68	62.4374	413.925	90.6686	46.925	13.9388	34.8806	4.91089	23.076	6.2043	2.01733	7.01439	1.15132	7.0162	1.37978	3.87689	0.595359	3.47033	0.517208	1	3	27	1	6	950	241	3.6
LAK38	L	64.1704	-18.0375	10	0.2	50.3576	13.8007	13.3364	5.72177	10.3757	2.74	0.411	2.73899	0.222625	0.295155	19.7736	185.098	40.9429	233.354	7.70975	126.35	100.404	39.349	58.6441	396.15	89.2891	43.5	13.8431	34.6272	4.91605	23.0871	6.26081	2.02765	6.96424	1.15332	7.05493	1.39489	3.93308	0.588797	3.52728	0.51264	2	3	54	9	20	355	647	4.7
LAK39	T	64.1577	-18.0475	9	0.2	50.4527	13.7827	13.3913	5.72435	10.3421	2.61569	0.420523	2.7505	0.22334	0.296781	20.12	185.831	40.8652	229.836	8.06211	132.725	119.806	46.5991	62.9938	412.9	89.6653	46.225	14.1103	35.2215	4.94999	23.2681	6.26608	2.04357	7.07011	1.15598	7.10267	1.39872	3.93217	0.59593	3.46281	0.518851	1	3	31	4	18	680	375	3.5
LAK40	L	64.1543	-18.0586	8	0.2	50.4018	13.8265	13.3049	5.76021	10.4127	2.63842	0.41691	2.72099	0.221546	0.296067	20.0005	184.794	40.7616	232.768	8.03694	124.625	94.7488	40.1845	62.2604	391.225	89.4145	42.425	13.6674	34.1707	4.83458	22.7038	6.18112	1.9872	6.90883	1.14313	6.92865	1.36068	3.85516	0.59088	3.48188	0.510258	3	3	59	16	26	361	610	14.2
LAK41	T	64.1521	-18.0639	8	0.2	50.3728	14.2246	12.9296	5.7566	10.5622	2.6102	0.406706	2.63145	0.21954	0.286313	19.3954	179.255	39.596	232.615	7.58391	127.35	111.031	46.1679	75.3855	395.725	86.7308	45.225	13.2987	33.3722	4.68571	22.1405	5.93645	1.94253	6.73574	1.09332	6.72693	1.33975	3.75181	0.564899	3.32919	0.494285	3	3	39	11	28	688	323	4.5
LAK42	L	64.1496	-18.0707	8	0.2	50.3753	13.8431	13.2296	5.76293	10.4881	2.66989	0.4161	2.70012	0.223666	0.291169	19.6727	183.403	40.5285	234.654	7.81043	124.05	99.9225	40.1576	64.8652	386.25	90.819	41.475	13.5433	33.9387	4.79406	22.5048	6.02774	1.96569	6.79064	1.12132	6.80165	1.35359	3.85559	0.57097	3.39707	0.502098	1	3	71	25	41	220	710	16.8
EVB01	L	63.672	-18.4108	5	53.3	50.3479	13.5311	13.4918	5.86553	10.3851	2.69561	0.424978	2.77347	0.222852	0.261653	20.0367	187.254	41.2194	233.444	7.69678	128.71	99.4459	38.2755	55.4123	395.482	86.2758	42.3352	-1	-1	-1	-1	-1	-1	-1	-1	-1	-1	-1	-1	-1	-1	1	3	37	5	24	235	778	10.4
EVB02	L	63.672	-18.4108	5	53.3	50.3196	13.5063	13.5228	5.8653	10.3823	2.7014	0.42578	2.78758	0.224697	0.264233	20.2637	188.195	41.3996	233.861	7.60131	127.038	98.4968	37.4424	54.841	392.881	85.8897	41.8139	-1	-1	-1	-1	-1	-1	-1	-1	-1	-1	-1	-1	-1	-1	2	3	45	3	33	124	840	14
EVB03	L	63.672	-18.4108	5	53.3	50.3288	13.5019	13.531	5.82913	10.4183	2.71322	0.419688	2.76863	0.222468	0.266848	19.7592	185.703	40.9878	235.631	7.76838	120.834	95.436	36.9999	53.8356	380.129	86.4689	40.1198	-1	-1	-1	-1	-1	-1	-1	-1	-1	-1	-1	-1	-1	-1	2	3	40	5	27	38	931	7.2
EVB04	L	63.672	-18.4108	5	53.3	50.361	13.536	13.4747	5.81596	10.4356	2.70435	0.424307	2.75954	0.223231	0.265329	19.4565	185.347	41.3738	237.791	7.88772	115.719	96.9545	35.8544	51.0933	367.097	90.8609	40.3283	-1	-1	-1	-1	-1	-1	-1	-1	-1	-1	-1	-1	-1	-1	2	3	52	6	29	72	879	9.7
EVB05	L	63.672	-18.4108	5	53.3	50.33	13.4953	13.5519	5.80362	10.4097	2.70953	0.424933	2.78542	0.221788	0.267824	19.6835	187.407	41.8113	236.672	7.88772	118.226	95.5072	36.7395	51.916	371.968	93.8292	40.2762	-1	-1	-1	-1	-1	-1	-1	-1	-1	-1	-1	-1	-1	-1	2	3	47	5	33	76	880	14.4
EVB06	L	63.672	-18.4108	5	53.3	50.3023	13.5007	13.5729	5.80004	10.4169	2.70987	0.425225	2.78148	0.2229	0.267761	19.5574	186.466	41.451	237.218	7.91159	117.314	97.8799	36.7395	51.8703	368.652	89.1234	40.198	-1	-1	-1	-1	-1	-1	-1	-1	-1	-1	-1	-1	-1	-1	2	3	50	8	26	56	895	12.5
EVB07	L	63.672	-18.4108	5	53.3	50.3395	13.5459	13.4873	5.80685	10.4292	2.70002	0.42571	2.77475	0.222674	0.268093	19.4565	185.143	41.2966	238.728	7.93545	114.174	96.0054	35.0213	50.1336	360.695	87.0722	39.5725	-1	-1	-1	-1	-1	-1	-1	-1	-1	-1	-1	-1	-1	-1	2	3	45	4	27	167	785	13.7
EVB08	L	63.672	-18.4108	5	53.3	50.2965	13.5186	13.5283	5.85452	10.4278	2.70186	0.421351	2.76336	0.222829	0.264967	19.6079	186.084	41.3996	237.557	7.76838	116.985	97.7375	35.594	50.2707	365.771	90.4989	39.8853	-1	-1	-1	-1	-1	-1	-1	-1	-1	-1	-1	-1	-1	-1	2	3	40	20	25	64	871	5.5
EVB09	L	63.672	-18.4108	5	53.3	50.3294	13.5264	13.5118	5.87904	10.3866	2.70227	0.424844	2.76015	0.221523	0.258032	19.7592	186.364	41.168	237.323	7.86385	120.176	97.3579	36.7916	51.5732	373.549	89.5095	40.0156	-1	-1	-1	-1	-1	-1	-1	-1	-1	-1	-1	-1	-1	-1	2	3	35	4	24	178	807	7.6
EVB10	L	63.672	-18.4108	5	53.3	50.3922	13.5388	13.5107	5.74153	10.4089	2.71302	0.42401	2.78254	0.222052	0.266121	19.8349	186.364	41.5025	237.843	7.67291	117.289	95.3885	35.3857	51.1162	368.678	86.8067	39.2858	-1	-1	-1	-1	-1	-1	-1	-1	-1	-1	-1	-1	-1	-1	2	3	34	11	18	154	848	8
EVB11	L	63.672	-18.4108	5	53.3	50.3693	13.5082	13.5434	5.76981	10.3785	2.71901	0.425071	2.79666	0.222424	0.267572	20.0115	187.763	41.3996	232.299	7.79225	125.747	97.1918	37.7809	54.544	390.79	89.7267	41.5011	-1	-1	-1	-1	-1	-1	-1	-1	-1	-1	-1	-1	-1	-1	2	3	31	2	25	138	857	5.8
EVB12	L	63.672	-18.4108	5	53.3	50.326	13.5221	13.5479	5.83233	10.3543	2.71024	0.428431	2.78737	0.223098	0.268252	19.9106	187.203	41.2709	232.065	7.88772	127.469	102.412	38.2755	56.4864	392.269	83.6213	42.1006	-1	-1	-1	-1	-1	-1	-1	-1	-1	-1	-1	-1	-1	-1	1	3	25	4	24	306	703	10.8
[truncated: 8 more columns]
