# Supplementary material for: Mush Disaggregation in Basaltic Magma Chambers: Evidence from the ad 1783 Laki Eruption
Source: Oxford University Press journal article supplement (doi:10.1093/petrology/egs061), 2012-09-27
Supplement: egs061_Supplementary_Data.zip [file EA2.xls]

## Sheet: Sheet1
Electronic Appendix 2
Details of point counting repeats. Errors estimated either directlt from repeats (SEE) or from theory as described in text. DRE is dense rock equivalent
				raw counts					DRE			mass fractions
	type		n	plg	ol	cpx	ves	gmass	plg vol%	ol vol%	cpx vol%	plg	ol	cpx	total
LAK01	3	average	3	68.3333	14.3333	32.6667	118.333	810	59.6736	12.252	28.0744	7.31648	1.87203	4.15144	13.3399
		stdev		3.51188	5.50757	8.02081	21.5716	29.5466	4.79658	3.54849	3.57163	0.469332	0.716916	1.05802	2.00602
		SEE		2.02759	3.1798	4.63081	12.4544	17.0587	2.76931	2.04872	2.06208	0.270969	0.413911	0.61085	1.15818
		P		5.13934	38.4249	24.5535	18.2295	3.64773	8.03803	28.9625	12.722	6.41472	38.2962	25.4857	15.0377
95% conf		%+ (2σ)		25.437	65.9327	39.6635	18.1784	2.35346
		%- (2σ)		21.6823	44.7203	30.9609	16.3013	2.63018
69% conf		%+ (1σ)		13.2307	34.1264	20.5848	9.47316	1.27131
		%- (1σ)		11.8791	26.3187	17.4261	8.80036	1.37051
LAK02	2	average	3	82.6667	10	39	98.6667	807.333	62.5683	7.8689	29.5628	8.6757	1.30081	4.87852	14.855
		stdev		15.1438	4.58258	11.1355	13.0512	40.5257	5.6916	4.46118	7.6083	1.0763	0.644479	1.42597	0.942048
		SEE		8.74325	2.64575	6.4291	7.5351	23.3975	3.28605	2.57566	4.39266	0.621405	0.37209	0.823284	0.543892
		P		18.3191	45.8258	28.5526	13.2275	5.0197	9.09662	56.6938	25.7361	12.406	49.5444	29.2296	6.34161
95% conf		%+ (2σ)		22.6876	83.0822	35.6562	20.3663	2.51052
		%- (2σ)		19.6971	51.9382	28.4957	17.971	2.77616
69% conf		%+ (1σ)		11.8069	42.9408	18.5137	10.6052	1.35203
		%- (1σ)		10.7322	31.3827	15.9208	9.74561	1.44717
LAK03	3	average	4	114	13.25	77.25	49.5	767.25	55.7245	6.2793	37.9962	11.5446	1.65282	9.24948	22.4469
		stdev		8.64099	9.97914	6.13052	21.7639	36.0035	1.80175	4.44743	5.13988	1.08786	1.25018	0.520856	1.75311
		SEE		4.32049	4.98957	3.06526	10.8819	18.0017	0.900875	2.22371	2.56994	0.54393	0.625092	0.260428	0.876553
		P		7.57981	75.3143	7.93595	43.9674	4.69253	3.23332	70.8269	13.5274	9.42308	75.6394	5.63119	7.81
95% conf		%+ (2σ)		18.6809	69.3452	23.6832	30.9357	3.19608
		%- (2σ)		16.6761	46.2422	20.413	25.4393	3.41997
69% conf		%+ (1σ)		9.73045	35.8778	12.3201	16.0716	1.70588
		%- (1σ)		9.01179	27.3605	11.1443	14.0869	1.78587
LAK04	1	average	3	56	16.6667	27.3333	210.667	759.333	56.4037	16.821	26.7752	6.45576	2.35316	3.77873	12.5877
		stdev		6.245	1.52753	11.1505	29.4845	49.6521	7.33665	2.4326	7.75551	0.72023	0.29199	1.71344	2.19916
		SEE		3.60555	0.881917	6.43774	17.0229	28.6667	4.23581	1.40446	4.47765	0.415825	0.16858	0.989257	1.26969
		P		11.1518	9.16515	40.7945	13.9958	6.53891	13.0074	14.4616	28.9653	11.1564	12.4084	45.3444	17.4708
95% conf		%+ (2σ)		28.583	59.8954	44.1203	12.3142	2.34
		%- (2σ)		23.8904	41.8975	33.5917	11.5965	2.64231
69% conf		%+ (1σ)		14.8631	31.0246	22.8912	6.43958	1.26827
		%- (1σ)		13.1705	24.4195	19.0597	6.18313	1.37677
LAK05	1	average	4	48	8.25	35.5	255.75	692.5	52.5377	9.17685	38.2855	6.06004	1.28091	5.35411	12.6951
		stdev		9.55685	3.77492	9.25563	38.0033	49	7.05961	4.44274	5.21449	1.18891	0.619384	1.55352	2.50828
		SEE		4.77842	1.88746	4.62781	19.0016	24.5	3.5298	2.22137	2.60724	0.594455	0.309692	0.776758	1.25414
		P		19.9101	45.7566	26.0722	14.8595	7.07581	13.4372	48.4125	13.62	19.6188	48.3551	29.0154	19.7579
95% conf		%+ (2σ)		31.2524	94.119	37.532	10.4427	2.4528
		%- (2σ)		25.7105	56.0518	29.7127	10.0398	2.78418
69% conf		%+ (1σ)		16.2506	48.624	19.4965	5.47546	1.33209
		%- (1σ)		14.2481	34.4215	16.6608	5.33156	1.45112
LAK06	2	average	3	147.667	8.66667	32.6667	117.333	722.667	78.3591	4.50833	17.1325	16.0665	1.15765	4.24688	21.4711
		stdev		7.57188	5.68624	11.2398	16.2583	50.9346	7.43631	2.75211	5.08468	0.76935	0.784124	1.58119	1.99955
		SEE		4.37163	3.28295	6.48931	9.38675	29.4071	4.29336	1.58893	2.93564	0.444184	0.452714	0.9129	1.15444
		P		5.12768	65.6105	34.4076	13.8565	7.04815	9.49004	61.0451	29.6785	4.78852	67.7343	37.2318	9.31276
95% conf		%+ (2σ)		15.7732	91.2313	39.6483	18.2514	3.26521
		%- (2σ)		14.4105	54.9915	30.9556	16.3621	3.50568
69% conf		%+ (1σ)		8.22821	47.1265	20.578	9.51182	1.74501
		%- (1σ)		7.74047	33.6265	17.4228	8.83466	1.83097
				raw counts					DRE			mass fractions
	type		n	plg	ol	cpx	ves	gmass	plg vol%	ol vol%	cpx vol%	plg	ol	cpx	total
LAK08	1	average	3	24.3333	2.66667	23.6667	183.667	829.333	49.9306	5.76389	44.3056	2.76396	0.363614	3.20488	6.33246
		stdev		4.04145	1.1547	14.2244	13.0128	56.1456	13.7411	3.70537	15.7582	0.560753	0.136741	1.99385	1.85103
		SEE		2.33333	0.666667	8.21246	7.51295	32.4157	7.9334	2.13929	9.09802	0.323751	0.0789476	1.15115	1.06869
		P		16.6087	43.3013	60.1031	7.08502	6.76997	27.5203	64.2859	35.5672	20.288	37.6061	62.2131	29.2308
95% conf		%+ (2σ)		47.3973	208.845	48.2121	13.5942	1.53371
		%- (2σ)		35.4261	81.9741	35.8738	12.6523	1.85676
69% conf		%+ (1σ)		24.5805	107.206	25.0007	7.10144	0.848463
		%- (1σ)		20.2162	57.7858	20.5007	6.76464	0.965104
LAK09	2	average	3	21.6667	7.33333	24.3333	292.333	682.333	40.3	13.965	45.735	2.97373	1.20042	3.91098	8.08513
		stdev		5.50757	1.52753	2.08167	29.1947	64.2599	7.30689	3.92074	3.72277	0.984604	0.15564	0.546641	1.3185
		SEE		3.1798	0.881917	1.20185	16.8556	37.1005	4.21863	2.26364	2.14934	0.568461	0.089859	0.315604	0.761236
		P		25.4196	20.8299	8.55479	9.9868	9.41767	18.1312	28.0755	8.13987	33.1101	12.9655	13.9771	16.3077
95% conf		%+ (2σ)		50.7127	101.76	47.2016	9.15888	1.90527
		%- (2σ)		37.2747	58.6597	35.3697	8.95095	2.28425
69% conf		%+ (1σ)		26.3061	52.5502	24.4949	4.81426	1.0518
		%- (1σ)		21.3967	36.4142	20.1803	4.74	1.1886
LAK10	2	average	3	67.6667	17.3333	42.6667	107	790.667	52.8812	13.6674	33.4514	7.28612	2.27059	5.44385	15.0006
		stdev		8.32666	4.04145	2.3094	10.8167	26.1024	4.09104	3.5818	2.08255	1.0141	0.480269	0.421953	0.80239
		SEE		4.8074	2.33333	1.33333	6.245	15.0702	2.36196	2.06795	1.20236	0.585489	0.277283	0.243615	0.46326
		P		12.3054	23.3161	5.41266	10.109	3.30131	7.73629	26.2068	6.22561	13.9182	21.1517	7.75101	5.34907
95% conf		%+ (2σ)		25.5782	58.5042	33.7562	19.3411	2.52438
		%- (2σ)		21.7844	41.2016	27.295	17.1988	2.79664
69% conf		%+ (1σ)		13.3042	30.3025	17.5334	10.0757	1.36037
		%- (1σ)		11.9384	23.9578	15.1961	9.30732	1.4579
LAK11	1	average	3	40.3333	4	28.6667	274.333	694	55.8321	5.601	38.5669	5.21233	0.628325	4.40125	10.2419
		stdev		7.76745	1	10.0664	13.0512	39.9625	4.2301	1.46584	5.5836	0.906832	0.129912	1.51924	2.45992
		SEE		4.48454	0.57735	5.81187	7.5351	23.0723	2.44225	0.846302	3.22369	0.523559	0.0750045	0.877133	1.42024
		P		19.2581	25	35.1155	4.75742	5.75828	7.57647	26.171	14.4777	17.3978	20.6759	34.5184	24.0182
95% conf		%+ (2σ)		34.7036	155	42.7294	9.80489	2.1917
		%- (2σ)		27.9528	72.7194	32.8238	9.49757	2.54249
69% conf		%+ (1σ)		18.0367	79.778	22.1827	5.14631	1.19793
		%- (1σ)		15.5923	48.3156	18.5798	5.03655	1.32417
LAK12	2	average	3	160.333	18.6667	80.6667	47	738.333	61.6777	7.20839	31.1139	15.8223	2.26356	9.34045	27.4263
		stdev		20.4287	3.78594	18.1475	13.1149	49.6924	5.60931	1.50474	6.9626	2.48294	0.58858	1.64648	1.75355
		SEE		11.7945	2.18581	10.4775	7.57188	28.6899	3.23854	0.868761	4.01986	1.43352	0.339817	0.950597	1.01241
		P		12.7414	20.2818	22.497	27.904	6.73035	9.09455	20.8748	22.3778	15.6927	26.0024	17.6274	6.3937
95% conf		%+ (2σ)		15.1119	55.9374	23.1064	31.9397	3.64694
		%- (2σ)		13.8533	39.9034	19.9868	26.0948	3.83922
69% conf		%+ (1σ)		7.88047	28.9737	12.0199	16.589	1.93836
		%- (1σ)		7.43026	23.1029	10.8988	14.4773	2.00699
LAK13	2	average	3	42	9.66667	20	267.667	727.667	58.8034	13.5726	27.6239	5.22713	1.46617	2.96605	9.65935
		stdev		4.58258	2.51661	5.56776	11.0604	39.4631	7.04962	3.68423	5.90642	0.682595	0.379583	0.907885	1.19267
		SEE		2.64575	1.45297	3.21455	6.38575	22.784	4.0701	2.12709	3.41007	0.394097	0.219152	0.524168	0.688588
		P		10.9109	26.0339	27.8388	4.13217	5.42323	11.9885	27.1445	21.3815	13.0587	25.8895	30.6093	12.3473
95% conf		%+ (2σ)		33.9137	84.7977	53.3886	10.1253	2.07477
		%- (2σ)		27.4361	52.6351	38.6558	9.75986	2.41401
69% conf		%+ (1σ)		17.625	43.8375	27.6782	5.30966	1.13475
		%- (1σ)		15.2809	31.8889	22.2889	5.17916	1.25684
				raw counts					DRE			mass fractions
	type		n	plg	ol	cpx	ves	gmass	plg vol%	ol vol%	cpx vol%	plg	ol	cpx	total
LAK14	2	average	3	44.6667	6	36.6667	360	581	50.2232	7.49924	42.2775	6.65	1.08782	6.42101	14.1588
		stdev		15.8219	2.64575	7.76745	43.0349	39.128	7.17725	4.96831	6.11045	2.57231	0.484585	1.30596	3.24105
		SEE		9.13479	1.52753	4.48454	24.8462	22.5906	4.14379	2.86845	3.52787	1.48513	0.279775	0.753996	1.87122
		P		35.4222	44.0959	21.184	11.9541	6.73459	14.2907	66.2508	14.4532	38.6814	44.5464	20.3389	22.8907
95% conf		%+ (2σ)		32.4189	116.51	36.5862	7.11016	2.83255
		%- (2σ)		26.531	63.2246	29.1821	7.1738	3.21374
69% conf		%+ (1σ)		16.8675	60.1209	19.022	3.75888	1.53971
		%- (1σ)		14.7376	40.0436	16.3372	3.78162	1.67673
LAK15	2	average	3	62.3333	8.33333	32	295.333	654	60.7787	7.89458	31.3267	8.1706	1.3907	5.00743	14.5687
		stdev		8.3865	5.50757	2	27.3922	74.6659	5.27114	4.97984	2.46767	0.976017	1.03345	0.777329	2.47241
		SEE		4.84195	3.1798	1.1547	15.8149	43.1084	3.04329	2.87511	1.42471	0.563504	0.59666	0.448791	1.42745
		P		13.4543	66.0908	6.25	9.27502	11.4168	8.67267	63.0793	7.87719	11.9455	74.3114	15.5235	16.9707
95% conf		%+ (2σ)		26.6086	93.4572	39.9358	9.17003	2.73084
		%- (2σ)		22.5681	55.8278	31.1819	8.95012	3.06406
69% conf		%+ (1σ)		13.8512	48.2887	20.7413	4.8181	1.47859
		%- (1σ)		12.395	34.2528	17.5621	4.73956	1.59819
LAK16	2	average	3	35.3333	20.6667	18	259.333	709.333	47.7206	28.34	23.9394	4.5134	3.18525	2.76128	10.4599
		stdev		4.04145	2.51661	6.245	32.1921	73.4597	0.532851	5.99811	5.7173	0.900135	0.127567	1.19759	1.97012
		SEE		2.33333	1.45297	3.60555	18.5861	42.412	0.307642	3.46301	3.30088	0.519693	0.0736507	0.691427	1.13745
		P		11.4381	12.1772	34.6944	12.4134	10.3562	1.11661	21.1648	23.8824	19.9436	4.00492	43.3707	18.8349
95% conf		%+ (2σ)		37.6382	52.2919	56.9881	10.3251	2.16031
		%- (2σ)		29.7782	38.0902	40.492	9.93912	2.50405
69% conf		%+ (1σ)		19.5514	27.1146	29.5352	5.41456	1.18036
		%- (1σ)		16.7008	21.9224	23.4893	5.2767	1.30404
LAK17	2	average	3	64.6667	9.33333	38.3333	160.333	732.333	58.0156	8.49771	33.4867	7.57467	1.33931	5.32201	14.236
		stdev		11.1505	2.51661	12.6623	15.0444	30.8923	3.14475	2.39644	4.54787	1.31693	0.377897	1.76921	3.2396
		SEE		6.43774	1.45297	7.31057	8.68588	17.8357	1.81562	1.38359	2.62571	0.76033	0.218179	1.02146	1.87038
		P		17.243	26.9637	33.032	9.38319	4.21834	5.42053	28.201	13.5811	17.386	28.2157	33.2433	22.7564
95% conf		%+ (2σ)		26.177	86.8229	35.9112	14.8053	2.55816
		%- (2σ)		22.2307	53.388	28.6848	13.6546	2.85754
69% conf		%+ (1σ)		13.6197	44.8715	18.6531	7.73154	1.38243
		%- (1σ)		12.1982	32.4399	16.0353	7.31978	1.48978
LAK18	1	average	3	33	3	30.3333	267.667	715.667	50.0436	4.53789	45.4185	4.19991	0.465152	4.53705	9.20211
		stdev		3.4641	2	6.4291	13.7961	30.0888	7.69667	2.91719	6.8356	0.569518	0.301526	0.779583	0.328879
		SEE		2	1.1547	3.71184	7.9652	17.3718	4.44367	1.68424	3.94654	0.328812	0.174086	0.450093	0.189879
		P		10.4973	66.6667	21.1948	5.15422	4.2043	15.3799	64.285	15.0502	13.5603	64.823	17.1826	3.57396
95% conf		%+ (2σ)		39.2336	191.167	41.3015	10.0621	2.0293
		%- (2σ)		30.7497	79.3594	31.9827	9.71307	2.37876
69% conf		%+ (1σ)		20.3757	98.2215	21.4438	5.27835	1.11244
		%- (1σ)		17.2961	54.9182	18.0571	5.15368	1.23831
LAK19	1	average	3	25.3333	5.33333	9.33333	370.667	618.333	63.684	14.0347	22.2813	3.84394	0.9676	1.71066	6.52221
		stdev		2.3094	3.51188	6.4291	22.1209	37.072	6.88189	10.6815	14.4853	0.487543	0.596499	1.19956	1.02062
		SEE		1.33333	2.02759	3.71184	12.7715	21.4035	3.97326	6.16698	8.36306	0.281483	0.344389	0.692568	0.589253
		P		9.11606	65.8478	68.8832	5.96786	5.99547	10.8063	76.108	65.0109	12.6834	61.6473	70.1226	15.6483
95% conf		%+ (2σ)		45.9035	126.368	86.5656	6.80106	1.81007
		%- (2σ)		34.6843	65.9608	53.3567	6.90188	2.24242
69% conf		%+ (1σ)		23.8358	65.169	44.7686	3.59971	1.00975
		%- (1σ)		19.7465	42.3165	32.4167	3.63575	1.16635
				raw counts					DRE			mass fractions
	type		n	plg	ol	cpx	ves	gmass	plg vol%	ol vol%	cpx vol%	plg	ol	cpx	total
LAK20	1	average	3	26.6667	4	16.3333	80	892	58.2898	8.91397	32.7962	2.82574	0.517993	2.04995	5.39368
		stdev		4.72582	1	8.96289	3.60555	9.64365	10.2118	3.07113	13.2427	0.478383	0.126241	1.12153	1.4941
		SEE		2.72845	0.57735	5.17472	2.08167	5.56776	5.8958	1.77312	7.64568	0.276195	0.072885	0.647515	0.862618
		P		17.7218	25	54.8748	4.50694	1.08113	17.519	34.453	40.3787	16.9295	24.3711	54.7101	27.7009
95% conf		%+ (2σ)		44.8792	155.19	60.7398	23.1434	1.3735
		%- (2σ)		34.0006	72.7255	42.2834	20.0302	1.67946
69% conf		%+ (1σ)		23.2762	79.8469	31.4519	12.0428	0.761949
		%- (1σ)		19.3163	48.3213	24.6767	10.9237	0.872498
LAK21	1	average	3	25.6667	5.33333	13.3333	209.333	767.333	57.7537	12.5528	29.6935	3.14751	0.800031	1.93172	5.87926
		stdev		4.93288	2.3094	4.04145	17.6163	11.9304	6.96001	6.93211	5.02452	0.597565	0.347863	0.547242	0.697568
		SEE		2.848	1.33333	2.33333	10.1708	6.88799	4.01837	4.00226	2.90091	0.345004	0.200839	0.31595	0.402741
		P		19.219	43.3013	30.3109	8.41542	1.55478	12.0512	55.2238	16.9212	18.9853	43.4812	28.3292	11.8649
95% conf		%+ (2σ)		45.7891	126.589	68.9086	12.2363	1.54488
		%- (2σ)		34.5533	65.9732	46.0916	11.55	1.89737
69% conf		%+ (1σ)		23.7573	65.2522	35.6693	6.40282	0.858692
		%- (1σ)		19.664	42.327	27.2568	6.15755	0.986167
LAK22	2	average	3	35.3333	4	25.3333	344.667	656.667	54.9199	6.25252	38.8276	4.89578	0.673293	4.09522	9.6643
		stdev		5.03322	1.73205	8.14453	10.2144	36.46	10.1121	2.84667	11.0648	0.954311	0.293837	1.16337	0.354982
		SEE		2.90593	1	4.70225	5.89727	21.0502	5.83824	1.64353	6.38829	0.550972	0.169647	0.671672	0.204949
		P		14.245	43.3013	32.1495	2.96355	5.55229	18.4125	45.5284	28.4974	19.4925	43.6418	28.408	3.67312
95% conf		%+ (2σ)		37.5325	154.933	46.0211	7.77961	2.17799
		%- (2σ)		29.74	72.7172	34.7193	7.74151	2.55459
69% conf		%+ (1σ)		19.5039	79.7542	23.8875	4.10048	1.19469
		%- (1σ)		16.6774	48.3136	19.7687	4.08687	1.33039
LAK26	2	average	3	86	5.33333	47.3333	97	784.333	61.9871	3.81646	34.1964	9.2387	0.704929	6.00011	15.9437
		stdev		7.93725	2.3094	7.0946	9.53939	30.6159	3.78078	1.5117	5.23227	1.11981	0.327937	0.737713	1.08767
		SEE		4.58258	1.33333	4.09607	5.50757	17.6761	2.18283	0.872782	3.02085	0.646524	0.189335	0.425919	0.627964
		P		9.22937	43.3013	14.9886	9.83442	3.90343	6.0993	39.6101	15.3006	12.1209	46.5206	12.295	6.82189
95% conf		%+ (2σ)		22.1254	126.704	31.7196	20.5553	2.64157
		%- (2σ)		19.2885	65.9795	25.9706	18.1183	2.90723
69% conf		%+ (1σ)		11.517	65.2953	16.4803	10.7041	1.4209
		%- (1σ)		10.4978	42.3324	14.4031	9.82939	1.51602
LAK27	3	average	5	166.2	18	70.6	110.8	643	64.9207	7.3026	27.7767	18.1808	2.41521	9.14447	29.7405
		stdev		27.8514	6.67083	13.5941	19.0447	41.1035	4.82684	3.22813	4.75358	3.07547	0.929786	1.76006	3.26851
		SEE		12.4555	2.98329	6.07947	8.51704	18.3821	2.15863	1.44366	2.12586	1.37539	0.415813	0.787125	1.46172
		P		16.7578	37.0602	19.2551	17.1883	6.39246	7.43497	44.2052	17.1136	16.916	38.4972	19.2473	10.9901
95% conf		%+ (2σ)		14.575	57.1226	24.9013	18.8913	4.09076
		%- (2σ)		13.4487	40.5231	21.31	16.8606	4.28989
69% conf		%+ (1σ)		7.60842	29.5926	12.9554	9.84418	2.17397
		%- (1σ)		7.20551	23.5099	11.663	9.11598	2.24507
LAK28	3	average	5	214.4	21	81	70	642	67.5513	6.90078	25.5479	21.8616	2.64322	9.80903	34.3139
		stdev		36.6101	6.96419	13.435	15.8745	37.4233	3.81192	2.94948	2.01919	3.04915	0.931138	1.48818	3.54649
		SEE		16.3725	3.11448	6.00833	7.0993	16.7362	1.70474	1.31905	0.903009	1.36362	0.416418	0.665536	1.58604
		P		17.0756	33.1628	16.5865	22.6779	5.82917	5.64301	42.7413	7.90353	13.9475	35.2274	15.1716	10.3355
95% conf		%+ (2σ)		12.3969	51.9742	22.997	25.1143	4.43873
		%- (2σ)		11.6327	37.8705	19.9177	21.4436	4.59519
69% conf		%+ (1σ)		6.47603	26.9342	11.9657	13.0615	2.35096
		%- (1σ)		6.20306	21.7807	10.859	11.7405	2.40676
				raw counts					DRE			mass fractions
	type		n	plg	ol	cpx	ves	gmass	plg vol%	ol vol%	cpx vol%	plg	ol	cpx	total
LAK29	2	average	4	113.75	13.5	51.75	58.5	783.75	63.6916	7.38598	28.9225	11.6675	1.69531	6.30506	19.6679
		stdev		12.2848	10.5987	18.0993	9.46925	34.2771	5.82715	5.74907	9.95213	1.30064	1.32906	2.25054	2.41277
		SEE		6.14241	5.29937	9.04963	4.73462	17.1385	2.91358	2.87454	4.97607	0.650322	0.664528	1.12527	1.20639
		P		10.7998	78.5092	34.9744	16.1867	4.37347	9.14902	77.8376	34.4097	11.1476	78.3962	35.6942	12.2676
95% conf		%+ (2σ)		18.6924	68.5183	30.1125	27.9787	2.96088
		%- (2σ)		16.6875	45.8776	24.8928	23.4451	3.19891
69% conf		%+ (1σ)		9.73695	35.4534	15.6466	14.5431	1.58437
		%- (1σ)		9.01825	27.1097	13.7626	12.9088	1.66947
LAK30	1	average	3	26.6667	6.33333	14.3333	195.333	793.333	57.5	13.7634	28.7366	3.15533	0.90825	2.00003	6.06361
		stdev		4.50925	5.03322	8.73689	14.7422	12.2202	9.01388	12.6822	10.6611	0.508559	0.722151	1.1803	1.5647
		SEE		2.60342	2.90593	5.04425	8.51143	7.05534	5.20416	7.32205	6.15521	0.293617	0.416934	0.681446	0.903382
		P		16.9097	79.4719	60.9551	7.54722	1.54036	15.6763	92.1438	37.0996	16.1175	79.5102	59.0142	25.8048
95% conf		%+ (2σ)		44.7675	112.511	65.846	12.9348	1.54672
		%- (2σ)		33.9665	61.9968	44.7039	12.1213	1.88589
69% conf		%+ (1σ)		23.2271	58.0423	34.09	6.76257	0.857683
		%- (1σ)		19.2948	39.0485	26.3074	6.47178	0.980241
LAK31	1	average	3	34.3333	8.33333	15.3333	27.3333	937	59.4952	15.5945	24.9103	3.42253	1.02154	1.80849	6.25257
		stdev		9.45163	1.52753	9.07377	15.5027	8.544	7.52687	7.29829	12.1862	0.867926	0.207186	1.06358	1.47567
		SEE		5.4569	0.881917	5.23874	8.95048	4.93288	4.34564	4.21367	7.03571	0.501097	0.119619	0.614057	0.851981
		P		27.529	18.3303	59.1768	56.7172	0.911847	12.6512	46.8004	48.9204	25.3592	20.2816	58.8104	23.6011
95% conf		%+ (2σ)		38.5604	93.6992	63.2465	44.2631	1.45845
		%- (2σ)		30.276	55.8535	43.4608	33.636	1.74314
69% conf		%+ (1σ)		20.0101	48.3844	32.7379	22.9543	0.803284
		%- (1σ)		17.0055	34.2723	25.4661	19.0876	0.905913
LAK32	2	average	3	31	19.3333	18	68	906	45.62	28.2284	26.1516	3.15472	2.40688	2.1656	7.72719
		stdev		2.64575	9.07377	7.93725	23.3024	7	3.17369	11.5901	10.2965	0.224084	1.12146	0.931248	0.996937
		SEE		1.52753	5.23874	4.58258	13.4536	4.04145	1.83233	6.69154	5.94467	0.129375	0.647477	0.537656	0.575582
		P		8.53468	46.9333	44.0959	34.2682	0.772627	6.9568	41.0582	39.3723	7.10314	46.5941	43.0019	12.9017
95% conf		%+ (2σ)		40.9919	54.7136	57.1952	25.5763	1.63773
		%- (2σ)		31.7396	39.2872	40.5398	21.767	1.92339
69% conf		%+ (1σ)		21.2671	28.3449	29.6235	13.2995	0.897346
		%- (1σ)		17.9067	22.6999	23.5209	11.9284	1.00016
LAK33	1	average	3	30.3333	9.33333	19.3333	15.6667	960	51.8633	18.4067	29.73	2.95147	1.12541	2.209	6.28588
		stdev		6.50641	5.7735	14.2244	4.50925	10.3923	3.73609	16.2974	19.7223	0.566634	0.727255	1.6111	1.4242
		SEE		3.75648	3.33333	8.21246	2.60342	6	2.15703	9.40931	11.3867	0.327146	0.419881	0.930169	0.822261
		P		21.4497	61.859	73.5744	28.7824	1.08253	7.20372	88.5407	66.3381	19.1984	64.6212	72.9335	22.6571
95% conf		%+ (2σ)		41.5765	86.9782	54.7512	62.4167	1.43671
		%- (2σ)		32.0737	53.4071	39.2963	43.0649	1.71473
69% conf		%+ (1σ)		21.5659	44.9337	28.3611	32.309	0.790895
		%- (1σ)		18.1137	32.4539	22.706	25.1999	0.8911
LAK34	2	average	3	29	17	19.6667	179.667	791.667	44.9237	27.8252	27.2511	3.37519	2.38635	2.68691	8.44844
		stdev		7.93725	6.08276	14.2945	19.3993	32.8075	10.4214	14.9529	16.9422	1.04253	0.801847	1.91442	2.00338
		SEE		4.58258	3.51188	8.25295	11.2002	18.9414	6.01678	8.63304	9.78156	0.601905	0.462947	1.10529	1.15665
		P		27.3698	35.781	72.684	10.7974	4.14411	23.1979	53.7386	62.1705	30.8881	33.6015	71.2501	23.713
95% conf		%+ (2σ)		42.554	59.1548	54.02	13.7443	1.83065
		%- (2σ)		32.6893	41.5375	38.9627	12.7839	2.15288
69% conf		%+ (1σ)		22.0829	30.6434	27.9976	7.18084	1.00404
		%- (1σ)		18.4961	24.1804	22.4886	6.83739	1.12009
				raw counts					DRE			mass fractions
	type		n	plg	ol	cpx	ves	gmass	plg vol%	ol vol%	cpx vol%	plg	ol	cpx	total
LAK35	2	average	3	33.6667	7	23.3333	220	732.667	52.224	11.0374	36.7387	4.18631	1.06749	3.43499	8.68879
		stdev		9.07377	2	6.65833	25.0599	13.5031	7.49225	3.02986	9.8165	1.07318	0.305816	0.911018	1.12585
		SEE		5.23874	1.1547	3.84419	14.4684	7.79601	4.32565	1.74929	5.66756	0.619602	0.176563	0.525976	0.650011
		P		26.9518	28.5714	28.5357	11.3909	1.84301	14.3464	27.451	26.7198	25.6355	28.6481	26.5217	12.9575
95% conf		%+ (2σ)		38.7812	105.08	48.5306	11.7559	1.94854
		%- (2σ)		30.4705	59.714	36.0751	11.1524	2.29381
69% conf		%+ (1σ)		20.1405	54.242	25.1733	6.15508	1.06941
		%- (1σ)		17.1246	37.236	20.6288	5.9394	1.1938
LAK36	1	average	3	47.3333	13.6667	17.6667	127.667	845	60.9065	17.9505	21.143	5.10286	1.79784	2.26038	9.16108
		stdev		13.3167	1.1547	12.741	24.5832	35.6791	12.6735	3.44925	15.0058	1.50943	0.178688	1.63237	2.58401
		SEE		7.68838	0.666667	7.35603	14.1931	20.5994	7.31703	1.99143	8.66359	0.871472	0.103166	0.942447	1.49188
		P		28.1338	8.44903	72.1189	19.2558	4.22238	20.8081	19.2154	70.9728	29.5801	9.93909	72.2165	28.2064
95% conf		%+ (2σ)		31.7205	67.9519	57.8181	17.3297	1.87973
		%- (2σ)		25.971	45.6339	40.8618	15.6399	2.17457
69% conf		%+ (1σ)		16.4807	35.1654	29.9486	9.03369	1.02558
		%- (1σ)		14.4033	26.9425	23.7331	8.42831	1.13159
LAK37	1	average	3	27	1.33333	6	950.333	240.667	78.5953	4.16667	17.238	10.5373	0.437115	2.7643	13.7388
		stdev		3.60555	2.3094	2.64575	252.595	85.1959	8.56201	7.21688	6.4333	3.84473	0.757105	1.59843	4.07982
		SEE		2.08167	1.33333	1.52753	145.836	49.1878	4.94328	4.16667	3.71427	2.21976	0.437115	0.922854	2.35549
		P		13.3539	173.205	44.0959	26.5796	35.3999	10.8938	173.205	37.3204	36.4867	173.205	57.8241	29.6957
95% conf		%+ (2σ)		42.2161	356.446	114.874		4.18783
		%- (2σ)		33.0793	94.4504	63.1133		5.13916
69% conf		%+ (1σ)		22.0732	182.73	59.4966		2.34549
		%- (1σ)		18.7374	75.8231	39.9524		2.6917
LAK38	2	average	3	54.3333	9	19.6667	354.667	647	65.5599	10.8964	23.5437	7.38899	1.47091	3.22066	12.0806
		stdev		4.72582	4.58258	8.5049	42.336	43.3013	3.85661	5.82393	9.59788	0.580637	0.667653	1.49049	1.44761
		SEE		2.72845	2.64575	4.91031	24.4427	25	2.22661	3.36245	5.54134	0.335231	0.38547	0.860535	0.835777
		P		8.69782	50.9175	43.2453	11.9368	6.69262	5.88257	53.4483	40.7663	7.85814	45.3905	46.279	11.983
95% conf		%+ (2σ)		28.8829	88.7809	53.8489	7.60241	2.49514
		%- (2σ)		24.1468	54.1513	38.9204	7.57876	2.85343
69% conf		%+ (1σ)		15.0308	45.893	27.9242	4.00774	1.35856
		%- (1σ)		13.3215	33.0024	22.4609	3.99931	1.48737
LAK39	1	average	3	31.3333	4.33333	18.3333	680	374.667	57.958	8.095	33.947	7.34053	1.18949	5.06388	13.5939
		stdev		3.51188	3.05505	0.57735	80.895	49.7427	5.42409	5.78326	0.606204	1.47173	0.778639	0.622934	1.54094
		SEE		2.02759	1.76383	0.333333	46.7047	28.7189	3.1316	3.33896	0.349992	0.849706	0.449548	0.359651	0.889661
		P		11.2081	70.5012	3.14918	11.8963	13.2765	9.35865	71.4423	1.78574	20.0494	65.46	12.3015	11.3355
95% conf		%+ (2σ)		39.5057	145.586	55.4614		3.42134
		%- (2σ)		31.1672	70.8093	39.9598		4.02497
69% conf		%+ (1σ)		20.5853	75.0877	28.8253		1.88523
		%- (1σ)		17.5523	46.5578	23.139		2.10341
LAK40	3	average	3	58.6667	16.3333	26	360.667	609.667	58.9385	16.5673	24.4942	8.20631	2.79801	4.26865	15.273
		stdev		14.2244	4.16333	14.7309	18.4481	50.659	7.63828	3.79092	11.4264	2.26631	0.821709	2.39772	4.71543
		SEE		8.21246	2.4037	8.5049	10.651	29.248	4.40996	2.18869	6.59702	1.30846	0.474414	1.38433	2.72245
		P		24.2461	25.4898	56.6574	5.11501	8.30929	12.9597	22.882	46.6493	27.6167	29.3676	56.1705	30.8743
95% conf		%+ (2σ)		27.5164	60.461	45.2724	7.36221	2.8963
		%- (2σ)		23.2203	42.224	34.3033	7.37453	3.24754
69% conf		%+ (1σ)		14.3261	31.3342	23.5025	3.88509	1.56854
		%- (1σ)		12.7767	24.6369	19.5064	3.88948	1.69464
				raw counts					DRE			mass fractions
	type		n	plg	ol	cpx	ves	gmass	plg vol%	ol vol%	cpx vol%	plg	ol	cpx	total
LAK41	3	average	3	39.3333	11.3333	27.6667	688.333	322.667	50.348	15.2425	34.4094	9.86802	3.29863	8.45717	21.6238
		stdev		4.50925	5.50757	11.5902	34.7755	72.2103	1.63784	8.65552	9.87097	2.51025	1.38055	4.60018	5.99701
		SEE		2.60342	3.1798	6.69162	20.0776	41.6907	0.94561	4.99727	5.69901	1.44929	0.797061	2.65591	3.46238
		P		11.4642	48.5962	41.8924	5.05213	22.3792	3.25304	56.7854	28.6868	25.4382	41.8523	54.3938	27.7333
95% conf		%+ (2σ)		34.0483	75.4994	42.5888		4.68272
		%- (2σ)		27.829	49.1811	33.0243		5.25006
69% conf		%+ (1σ)		17.7729	39.1619	22.1897		2.54836
		%- (1σ)		15.5168	29.4098	18.704		2.75281
LAK42	1	average	3	71.3333	25	41	219.667	709.667	51.9039	18.4314	29.6647	8.25198	3.53174	5.61923	17.403
		stdev		16.8028	8.544	11.3578	43.3859	7.57188	2.12651	5.46792	3.38355	1.64841	1.08669	1.39783	3.34129
		SEE		9.70109	4.93288	6.55744	25.0488	4.37163	1.22774	3.15691	1.95349	0.951711	0.627403	0.807035	1.9291
		P		23.5553	34.176	27.702	19.7508	1.06696	4.09701	29.6663	11.406	19.976	30.7693	24.8757	19.1996
95% conf		%+ (2σ)		24.6655	46.5798	34.4834	11.9189	2.88861
		%- (2σ)		21.159	34.9832	27.7825	11.2692	3.17229
69% conf		%+ (1σ)		12.8373	24.1617	17.915	6.23562	1.55371
		%- (1σ)		11.5754	19.9356	15.4896	6.00348	1.6553
EVB01	1	average	3	37	5	24	235.333	778	55.3501	8.19111	36.4588	4.35734	0.716072	3.3496	8.42301
		stdev		10.4403	2.64575	4.3589	11.5902	19.4679	5.75753	5.49335	1.15415	1.2414	0.375071	0.619274	1.57667
		SEE		6.02771	1.52753	2.51661	6.69162	11.2398	3.32411	3.17159	0.666349	0.716723	0.216547	0.357538	0.91029
		P		28.217	52.915	18.1621	4.92503	2.5023	10.402	67.0648	3.16563	28.4899	52.379	18.488	18.7186
95% conf		%+ (2σ)		36.688	132.446	47.7576	11.3266	1.86662
		%- (2σ)		29.1692	67.4845	35.6358	10.7696	2.19324
69% conf		%+ (1σ)		19.0545	68.2421	24.7696	5.92889	1.02358
		%- (1σ)		16.3296	43.618	20.3493	5.7299	1.14121
EVB02	2	average	3	45.3333	2.66667	33	124.333	840	57.515	4.02346	38.4615	4.90395	0.353192	4.22452	9.48166
		stdev		14.0119	1.52753	21.166	4.50925	52.5738	6.14422	2.75792	8.88231	1.56066	0.208046	2.6999	4.02628
		SEE		8.08977	0.881917	12.2202	2.60342	30.3535	3.54737	1.59229	5.12821	0.901046	0.120115	1.55879	2.32457
		P		30.9086	57.2822	64.1394	3.62674	6.25878	10.6828	68.546	23.094	31.8245	58.9045	63.9102	42.4638
95% conf		%+ (2σ)		32.551	208.888	39.4159	17.6161	1.91794
		%- (2σ)		26.515	81.9747	30.8132	15.8648	2.21242
69% conf		%+ (1σ)		16.9102	107.221	20.4573	9.18218	1.04557
		%- (1σ)		14.7283	57.7864	17.3352	8.55471	1.15141
EVB03	2	average	3	40.3333	5	26.6667	38	930.667	55.7741	7.03793	37.188	4.01481	0.606123	3.1398	7.76073
		stdev		7.23418	3.60555	6.02771	6.245	39.8037	3.94486	4.85769	7.63701	0.823322	0.442728	0.757451	1.16731
		SEE		4.17665	2.08167	3.4801	3.60555	22.9807	2.27757	2.80459	4.40923	0.475345	0.255609	0.437315	0.673949
		P		17.936	72.111	22.6039	16.4342	4.2769	7.07293	69.0216	20.5362	20.5071	73.0426	24.1242	15.0413
95% conf		%+ (2σ)		35.0097	132.592	44.9396	36.2844	1.6378
		%- (2σ)		28.0715	67.4917	34.019	28.8725	1.91455
69% conf		%+ (1σ)		18.1754	68.2962	23.3028	18.834	0.896026
		%- (1σ)		15.6642	43.6243	19.3279	16.1494	0.995585
EVB04	2	average	3	52.3333	5.66667	29	72	879	60.0733	6.89227	33.0345	5.38105	0.70947	3.54283	9.63335
		stdev		9.71253	2.51661	8.18535	13	29.5466	2.71385	3.64206	4.84928	1.00342	0.304721	1.03553	1.66572
		SEE		5.60753	1.45297	4.72582	7.50555	17.0587	1.56684	2.10274	2.79974	0.579327	0.175931	0.597865	0.961704
		P		18.559	44.4108	28.2254	18.0556	3.36138	4.51757	52.8426	14.6795	18.6474	42.9505	29.229	17.2912
95% conf		%+ (2σ)		29.9146	121.542	42.6737	24.7017	1.90106
		%- (2σ)		24.7593	64.5709	32.7277	21.1473	2.18069
69% conf		%+ (1σ)		15.544	62.6494	22.136	12.8475	1.03442
		%- (1σ)		13.6835	41.1522	18.5202	11.5687	1.13486
				raw counts					DRE			mass fractions
	type		n	plg	ol	cpx	ves	gmass	plg vol%	ol vol%	cpx vol%	plg	ol	cpx	total
EVB05	2	average	3	47	5	32.6667	75.6667	879.667	55.1822	5.84039	38.9774	4.82884	0.624995	3.97787	9.43171
		stdev		14.4222	2	7.57188	21.1266	25.5408	2.33946	1.39775	2.14452	1.45706	0.23426	0.881398	2.50225
		SEE		8.32666	1.1547	4.37163	12.1974	14.746	1.35069	0.806993	1.23814	0.841232	0.13525	0.508875	1.44467
		P		30.6855	40	23.1792	27.9206	2.90347	4.23952	23.9325	5.50196	30.174	37.4818	22.1575	26.5302
95% conf		%+ (2σ)		31.9032	132.561	39.7047	23.9712	1.87454
		%- (2σ)		26.0795	67.4902	30.975	20.623	2.15563
69% conf		%+ (1σ)		16.5723	68.2848	20.6032	12.4695	1.02075
		%- (1σ)		14.4681	43.623	17.4348	11.2655	1.12174
EVB06	2	average	3	50	8.33333	26	56.3333	894.667	60.0837	10.758	29.1583	5.05274	1.03594	3.10631	9.19499
		stdev		12.49	1.1547	13.7477	12.7017	15.2753	5.80078	4.67225	9.03632	1.14588	0.165145	1.6188	2.58061
		SEE		7.2111	0.666667	7.93725	7.33333	8.81917	3.34908	2.69752	5.21712	0.661576	0.0953463	0.934617	1.48992
		P		24.98	13.8564	52.8759	22.5474	1.70737	9.6545	43.4305	30.9906	22.6785	15.9416	52.1134	28.0654
95% conf		%+ (2σ)		30.7582	93.6865	45.616	28.6382	1.84056
		%- (2σ)		25.3194	55.8523	34.4066	23.8921	2.11807
69% conf		%+ (1σ)		15.9793	48.3793	23.6535	14.8831	1.00238
		%- (1σ)		14.0156	34.2713	19.5718	13.1716	1.10209
EVB07	2	average	3	45	3.66667	26.6667	167.333	785.333	58.9634	4.45254	36.584	5.22926	0.528154	3.65555	9.41296
		stdev		13.7477	3.05505	4.16333	30.0888	48.1802	8.6825	2.99942	10.9097	1.75135	0.457914	0.616466	2.25198
		SEE		7.93725	1.76383	2.4037	17.3718	27.8169	5.01285	1.73171	6.29873	1.01114	0.264377	0.355917	1.30018
		P		30.5505	83.3196	15.6125	17.9813	6.135	14.7252	67.3641	29.821	33.4914	86.7009	16.8639	23.9242
95% conf		%+ (2σ)		32.6171	165.139	44.7922	14.4267	1.97519
		%- (2σ)		26.577	74.7556	33.9741	13.341	2.29087
69% conf		%+ (1σ)		16.9492	84.9356	23.238	7.53419	1.07886
		%- (1σ)		14.7654	50.2528	19.2996	7.1458	1.19241
EVB08	2	average	3	40.3333	20	24.6667	64	871	47.6227	23.4681	28.9092	4.19109	2.52918	3.03233	9.7526
		stdev		5.50757	4	4.6188	31.9531	37	7.78288	4.03908	4.16802	0.680316	0.476024	0.577328	0.668583
		SEE		3.1798	2.3094	2.66667	18.4481	21.362	4.49345	2.33196	2.40641	0.39278	0.274833	0.33332	0.386007
		P		13.6551	20	18.7249	49.9267	4.24799	16.3428	17.211	14.4176	16.2324	18.8212	19.0391	6.85543
95% conf		%+ (2σ)		34.9611	53.5615	47.0834	26.5016	1.89621
		%- (2σ)		28.0527	38.699	35.2315	22.4229	2.17932
69% conf		%+ (1σ)		18.1534	27.7525	24.4122	13.7794	1.03242
		%- (1σ)		15.6528	22.3171	20.0929	12.3104	1.13413
EVB09	2	average	3	35.3333	3.66667	23.6667	177.667	807.333	56.0053	5.72751	38.2672	4.07819	0.514328	3.21505	7.80757
		stdev		7.57188	1.52753	0.57735	36.9098	72.9475	4.42337	1.87238	5.65895	1.09971	0.227128	0.201373	1.38555
		SEE		4.37163	0.881917	0.333333	21.3099	42.1162	2.55384	1.08102	3.2672	0.634919	0.131132	0.116263	0.799948
		P		21.4298	41.6598	2.43951	20.7747	9.03561	7.89813	32.691	14.788	26.9657	44.1601	6.26344	17.7463
95% conf		%+ (2σ)		37.7606	165.149	48.2008	13.8794	1.75441
		%- (2σ)		29.8225	74.7559	35.8704	12.8902	2.07407
69% conf		%+ (1σ)		19.6064	84.939	24.9958	7.24989	0.963667
		%- (1σ)		16.7279	50.253	20.4986	6.89614	1.07884
EVB10	2	average	3	34	11	17.6667	153.667	847.667	54.519	17.9074	27.5737	3.70997	1.45432	2.30156	7.46586
		stdev		8	3	8.0829	20.502	62.6605	1.76094	4.66397	6.21971	0.853701	0.30143	1.09041	1.9852
		SEE		4.6188	1.73205	4.66667	11.8369	36.177	1.01668	2.69275	3.59095	0.492884	0.174031	0.629547	1.14615
		P		23.5294	27.2727	45.7523	13.3419	7.39211	3.22997	26.045	22.5567	23.011	20.7265	47.3768	26.5904
95% conf		%+ (2σ)		38.6987	78.0747	57.805	15.3693	1.67298
		%- (2σ)		30.3827	49.9562	40.8587	14.0868	1.9797
69% conf		%+ (1σ)		20.0877	40.3712	29.943	8.01907	0.919017
		%- (1σ)		17.0708	29.96	23.7312	7.56015	1.02952
				raw counts					DRE			mass fractions
	type		n	plg	ol	cpx	ves	gmass	plg vol%	ol vol%	cpx vol%	plg	ol	cpx	total
EVB11	2	average	3	30.6667	2.33333	24.6667	138	857.333	53.4349	3.88386	42.6812	3.33364	0.308565	3.17389	6.81609
		stdev		5.7735	2.08167	5.50757	17.3494	6.1101	9.4775	3.364	6.23921	0.631621	0.274983	0.686033	1.05611
		SEE		3.33333	1.20185	3.1798	10.0167	3.52767	5.47183	1.94221	3.60221	0.364666	0.158762	0.396081	0.609747
		P		18.8266	89.2143	22.328	12.572	0.712687	17.7365	86.6148	14.6182	18.9469	89.1168	21.6149	15.4944
95% conf		%+ (2σ)		41.1994	231.092	47.0421	16.4797	1.58628
		%- (2σ)		31.8781	84.8154	35.2195	14.9723	1.89413
69% conf		%+ (1σ)		21.3787	118.522	24.3941	8.59397	0.873741
		%- (1σ)		17.9924	61.1348	20.0852	8.0542	0.984736
EVB12	1	average	3	25	4	24	306	702.667	46.3466	7.99467	45.6587	3.23807	0.649916	3.72562	7.6136
		stdev		10.8167	1	6.08276	11.1355	39.3743	12.0315	3.07906	9.95286	1.18338	0.191727	0.86915	1.18392
		SEE		6.245	0.57735	3.51188	6.4291	22.7327	6.9464	1.77769	5.74628	0.683222	0.110694	0.501804	0.683535
		P		43.2666	25	25.3448	3.63906	5.60355	25.9599	38.5138	21.7984	36.5457	29.5003	23.329	15.55
95% conf		%+ (2σ)		46.4539	154.984	47.6366	8.88423	1.84559
		%- (2σ)		34.9462	72.7188	35.6012	8.70031	2.2157
69% conf		%+ (1σ)		24.1065	79.7724	24.7167	4.67002	1.01913
		%- (1σ)		19.9122	48.3151	20.3272	4.60433	1.15273
