# Supplementary material for: Mush Disaggregation in Basaltic Magma Chambers: Evidence from the ad 1783 Laki Eruption
Source: Oxford University Press journal article supplement (doi:10.1093/petrology/egs061), 2012-09-27
Supplement: egs061_Supplementary_Data.zip [file EA3.xls]

## Sheet: Sheet1
Electronic Appendix 3
Accuracy and precision estimates for geochemical measurements presented in paper.
Table EA3.1. Precision estimates from XRF spectrometry major element analyses, based on repeats on different disks of the same unknown sample, and repeats on the same disk of the same unknown sample.
	SiO2	Al2O3	Fe2O3	MgO	CaO	Na2O	K2O	TiO2	MnO	P2O5
repeats on different disks of the same sample
LAK21-r1	49.74	13.25	15.09	5.79	10.26	2.51	0.42	2.78	0.23	0.27
LAK21-r2	49.79	13.3	15.08	5.78	10.24	2.49	0.42	2.77	0.23	0.26
LAK21-r3	50.02	13.33	15.15	5.8	10.28	2.48	0.43	2.79	0.23	0.26
LAK21-r4	49.91	13.22	15.12	5.84	10.26	2.47	0.43	2.77	0.22	0.27
LAK21-r5	49.74	13.23	15.03	5.78	10.24	2.47	0.42	2.78	0.22	0.26
LAK21-r6	49.98	13.23	15.13	5.82	10.29	2.49	0.42	2.79	0.22	0.27
LAK21-r7	49.97	13.35	15.12	5.81	10.28	2.49	0.42	2.79	0.22	0.27
LAK21-r8	49.67	13.19	15.04	5.75	10.2	2.47	0.42	2.77	0.23	0.26
average	49.85	13.26	15.1	5.8	10.26	2.48	0.42	2.78	0.23	0.26
stdev	0.13	0.06	0.04	0.03	0.03	0.01	0	0.01	0	0
%P	0.27	0.43	0.29	0.48	0.29	0.57	0.74	0.35	1.41	0.72
repeats on one disk of the same sample
LAK21-r8	49.71	13.21	15.03	5.81	10.21	2.43	0.42	2.78	0.23	0.27
LAK21-r8	49.73	13.24	15.03	5.77	10.22	2.53	0.42	2.77	0.22	0.27
LAK21-r8	49.71	13.22	15.05	5.78	10.24	2.45	0.42	2.77	0.23	0.26
LAK21-r8	49.73	13.22	15.05	5.78	10.2	2.41	0.42	2.78	0.23	0.26
LAK21-r8	49.71	13.23	15.05	5.78	10.2	2.46	0.42	2.77	0.23	0.27
LAK21-r8	49.68	13.2	15.06	5.78	10.2	2.49	0.42	2.77	0.23	0.27
LAK21-r8	49.75	13.17	15.05	5.77	10.22	2.42	0.42	2.78	0.23	0.26
LAK21-r8	49.73	13.18	15.06	5.8	10.19	2.47	0.42	2.77	0.23	0.26
LAK21-r8	49.75	13.19	15.04	5.78	10.21	2.46	0.42	2.77	0.22	0.26
average	49.72	13.21	15.05	5.78	10.21	2.46	0.42	2.77	0.23	0.26
stdev	0.02	0.02	0.01	0.01	0.02	0.04	0	0	0	0
%P	0.04	0.18	0.07	0.23	0.15	1.51	0.38	0.16	0.59	0.57
Table EA3.2 Accuracy estimates from XRF spectrometry major element analyses, based on repeats on standard material of known composition. a Wilson (1997). b USGS certificate of analysis
	SiO2	Al2O3	Fe2O3	MgO	CaO	Na2O	K2O	TiO2	MnO	P2O5
BHVO1a	49.94	13.8	12.23	7.23	11.4	-	0.52	2.71	0.17	0.27
n	14	14	14	14	14	-	14	14	14	14
average	50.33	13.68	12.36	7.17	11.46	-	0.53	2.73	0.17	0.29
stdev	0.05	0.08	0.02	0.04	0.03	-	0	0.01	0	0.01
%P	0.09	0.57	0.15	0.54	0.26	-	0.42	0.19	1.13	2.59
%A	0.77	0.91	1.07	0.85	0.48	-	1.71	0.59	0.34	4.21
BIR1b	47.96	15.5	11.3	9.7	13.3	1.82	-	0.96	0.18	-
n	4	4	4	4	4	4	-	4	4	-
average	47.79	15.53	11.37	9.51	13.21	1.8	-	0.94	0.17	-
stdev	0.04	0.05	0.01	0.02	0.02	0.01	-	0	0	-
%P	0.07	0.3	0.05	0.17	0.15	0.72	-	0.18	0.34	-
%A	0.36	0.18	0.57	2	0.72	1.39	-	2.29	2.04	-
Table EA3.3. Precision estimates from XRF spectrometry trace element analyses, based on multiple repeats on different unknown samples. σr is the 1 sigma standard deviation of the repeat measurements.
	Nb	Zr	Y	Sr	Rb	Zn	Cu	Ni	Cr	V	Ba	Sc
LAK04
n	8	8	8	8	8	8	8	8	8	8	8	8
average	19.8	181.51	40.14	233.4	7.88	128.46	97.31	42.51	71.85	395.2	81.63	44.39
σr	0.093	0.314	0.169	0.37	0.149	1.45	0.57	0.41	1	2.6	2.25	0.67
P%	0.47	0.17	0.42	0.16	1.89	1.13	0.59	0.97	1.39	0.66	2.76	1.52
LAK10
n	8	8	8	8	8	8	8	8	8	8	8	8
average	19.69	183.18	40.71	236.39	8.06	119.21	92.58	38.53	62.69	378.13	86.75	40.84
σr	0.155	0.276	0.125	0.34	0.213	0.99	0.59	0.66	1.15	1.46	2.33	0.9
P%	0.79	0.15	0.31	0.14	2.65	0.83	0.63	1.73	1.84	0.39	2.69	2.2
LAK13
n	8	8	8	8	8	8	8	8	8	8	8	8
average	20.19	186.28	40.89	233.99	8.15	127.9	93.73	39.91	64.2	394.7	86.96	42.7
σr	0.083	0.249	0.203	0.3	0.214	0.92	0.59	0.61	0.76	2.3	4.23	0.6
P%	0.41	0.13	0.5	0.13	2.62	0.72	0.63	1.54	1.18	0.58	4.86	1.42
LAK18
n	8	8	8	8	8	8	8	8	8	8	8	8
average	20.16	185.53	41.03	232.99	8.04	128.04	97.8	39.26	60.91	395.61	85.08	43.11
σr	0.106	0.306	0.175	0.336	0.169	0.69	0.63	0.77	0.85	2.69	2.66	0.85
P%	0.53	0.16	0.43	0.14	2.1	0.54	0.64	1.96	1.4	0.68	3.13	1.97
LAK26
n	8	8	8	8	8	8	8	8	8	8	8	8
average	19.48	181.71	40.31	236.58	8	116.73	94.56	39.7	65.53	368.96	86.84	40.84
σr	0.046	0.569	0.196	0.396	0.141	0.77	0.68	0.3	0.56	2.13	2.9	0.59
P%	0.24	0.31	0.49	0.17	1.77	0.66	0.72	0.75	0.85	0.58	3.34	1.45
combined
σr	0.1	0.34	0.17	0.35	0.18	0.96	0.61	0.55	0.86	2.24	2.87	0.72
P%	0.49	0.19	0.43	0.15	2.2	0.78	0.64	1.39	1.33	0.58	3.36	1.71
Table EA3.4. Accuracy estimates from XRF spectrometry trace element analyses, based on repeats on standard material of known composition, where nd is not determined. a Gladney et al. (1983). b Wilson (1997). c Jochum et al. (1990). d Godfrey Fitton (pers comms, 2007). e USGS certificate of analysis.
BCR1	Nb	Zr	Y	Sr	Rb	Zn	Cu	Ni	Cr	V	Ba	Sc
BCR1a	nd	191	nd	nd	nd	nd	nd	nd	16	404	678	nd
	6	6	6	6	6	6	6	6	6	6	6	6
average	13.2	192.3	38.6	338	47.4	127.5	20.2	14.9	16	402.5	680.9	33.8
stdev	0.1	0.8	0.2	0.9	0.2	0.8	0.6	0.4	0.9	1.9	3.2	0.7
P%	0.39	0.42	0.57	0.26	0.4	0.59	2.76	2.47	5.7	0.46	0.46	2.04
A%	nd	0.68	nd	nd	nd	nd	nd	nd	0.1	0.36	0.43	nd
BHVO1b	19.8c	179	28	403	9.0d	105	136	121	nd	317	139	31.8
	6	6	6	6	6	7	7	7	7	7	7	7
average	20	174.5	27.6	396.5	9.1	104.4	135.9	119	287.5	311.8	134.5	33
stdev	0.1	1.8	0.2	2.5	0.7	0.9	0.6	0.8	0.8	1.6	2.5	0.6
P%	0.42	1.04	0.88	0.63	7.95	0.87	0.41	0.67	0.27	0.52	1.86	1.76
A%	0.75	2.57	1.51	1.635	1.28	0.59	0.11	1.68	nd	1.66	3.33	3.76
BIR1e	0.6	18	16	110	0.3	70	125	170	370	310	7	44
	6	6	6	6	6	6	6	6	6	6	6	6
average	0.6	17	16.5	108.7	0.3	66.2	125.9	155.5	375	320	8.1	43.1
stdev	0.1	0.3	0.1	0.4	0.2	0.4	0.6	1	1.2	2.4	1.6	0.7
P%	8.15	1.7	0.71	0.32	61.24	0.63	0.51	0.62	0.33	0.76	19.6	1.53
A%	5.26	6.19	2.93	1.2	6.25	5.79	0.68	9.32	1.33	3.11	13.22	2.13
Table EA3.5.	Precision estimates for electron microprobe analyses from closely spaced (10 µm apart) repeat measurements on olivine and plagioclase crystals and matrix glass, and more widely spaced (30 µm apart) measurements on clinopyroxene, where n = number of repeats, = average of repeats and σr = 1σ standard deviation on repeats. Mean and standard deviations are given in wt%, and precision (100[σr /]) in %…
	plg		n = 9			cpx		n = 16			olv		n = 5		gls		n = 11
		σr		P%			σr		P%			σr	P%			σr		P%
SiO2	46.06	0.21		0.46		51.65	0.21		0.4		38.1	0.07	0.18		49.26	0.32		0.65
TiO2	-	-		-		0.76	0.02		2.51		-	-	-		3.08	0.03		1.01
Al2O3	33.23	0.13		0.4		2.16	0.04		2.03		-	-	-		12.74	0.09		0.72
Cr2O3	-	-		-		0.21	0.01		5.1		-	-	-		-	-		-
FeO	0.57	0.01		1.25		7.69	0.05		0.68		20.98	0.18	0.86		14.38	0.28		1.95
MnO	-	-		-		0.21	0.01		6.51		0.33	0.01	3.36		0.25	0.01		5.52
MgO	0.11	0.01		5.15		16.23	0.06		0.34		40.44	0.13	0.31		5.5	0.07		1.29
CaO	17.46	0.08		0.48		20.19	0.04		0.21		0.29	0.01	2.05		9.65	0.05		0.49
Na2O	1.63	0.02		1.2		0.27	0.01		3.94		-	-	-		2.77	0.21		7.4
K2O	-	-		-		-	-		-		-	-	-		0.46	0.01		2.74
P2O5	-	-		-		-	-		-		-	-	-		0.42	0.02		4.26
NiO	-	-		-		-	-		-		0.12	0.01	5.71		-	-		-
Table EA3.6. Precision and accuracy estimates for REE from ICP-MS based on repeat analysis of basalt standard BCR1. * Valerie Olive (pers comms, 2006).
	La	Ce	Pr	Nd	Sm	Eu	Tb	Gd	Dy	Ho	Er	Tm	Yb	Lu
Certified values*	24.9	53.7	6.8	28.8	6.59	1.95	1.05	6.68	6.34	1.26	3.63	0.56	3.38	0.51
BCR1 1	24.46	51.53	6.77	28.4	6.42	1.93	0.96	6.66	6.44	1.23	3.56	0.51	3.27	0.49
BCR1 2	24.3	51.42	6.75	28.26	6.4	1.93	0.96	6.61	6.42	1.23	3.53	0.5	3.25	0.49
BCR1 3	24.35	51.28	6.72	28.24	6.37	1.92	0.95	6.6	6.4	1.23	3.48	0.5	3.27	0.49
BCR1 4	24.42	51.52	6.74	28.36	6.36	1.93	0.95	6.63	6.4	1.23	3.49	0.5	3.23	0.49
BCR1 5	24.43	51.59	6.76	28.42	6.4	1.93	0.95	6.64	6.44	1.23	3.49	0.5	3.25	0.49
BCR1 6	24.34	51.37	6.72	28.1	6.38	1.93	0.95	6.6	6.37	1.21	3.49	0.5	3.21	0.49
BCR1 7	24.51	51.71	6.75	28.37	6.39	1.96	0.96	6.68	6.43	1.23	3.51	0.5	3.27	0.49
average	24.4	51.49	6.74	28.31	6.39	1.93	0.96	6.63	6.41	1.23	3.51	0.5	3.25	0.49
stdev	0.07	0.14	0.02	0.11	0.02	0.01	0	0.03	0.03	0.01	0.03	0	0.02	0
P%	0.3	0.28	0.27	0.4	0.31	0.54	0.5	0.45	0.43	0.52	0.81	0.57	0.68	0.41
A%	2	4.12	0.81	1.72	3.06	0.89	8.92	0.72	-1.15	2.63	3.42	10.57	3.83	3.9
