# Supplementary material for: Mush Disaggregation in Basaltic Magma Chambers: Evidence from the ad 1783 Laki Eruption
Source: Oxford University Press journal article supplement (doi:10.1093/petrology/egs061), 2012-09-27
Supplement: egs061_Supplementary_Data.zip [file EA4_new.xls]

## Sheet: LAK
Electronic Appendix 4
Electron probe analyses from individual points on tephra glass (gls), plagioclase, clinopyroxene and olivine.
For crystals, sample refers to the hand specimen number, mount to whether the sample was in a thin section (TS) or probe mount (PM), no. is the crystal number, with the suffix c referring to crystal cores, r to crystal rims and GM to groundmass crystals.
phase	mount	sample	no.	SiO2	TiO2	Al2O3	Cr2O3	FeO	MnO	MgO	CaO	Na2O	K2O	P2O5	NiO	Total	Mg# (Fe2+)
gls	TS	LAKt07	g1	49.217	3.118	12.777	0.016	14.525	0.26	5.482	9.679	2.814	0.468	0.431	0.01	98.797	42.7805
gls	TS	LAKt07	g2	49.765	3.018	12.837	0.022	14.043	0.228	5.431	9.599	2.891	0.476	0.434	0.01	98.755	43.3788
gls	TS	LAKt07	g3	49.517	3.084	12.733	0.029	14.26	0.244	5.472	9.696	2.797	0.477	0.444	0.017	98.772	43.187
gls	TS	LAKt07	g4	49.323	3.084	12.786	0.015	13.984	0.247	5.469	9.571	3.053	0.448	0.414	0.02	98.414	43.6537
gls	TS	LAKt07	g5	49.119	3.128	12.675	0.016	14.26	0.268	5.492	9.654	2.848	0.474	0.447	0.02	98.4	43.2766
gls	TS	LAKt07	g6	49.162	3.102	12.733	0.01	14.422	0.255	5.47	9.745	2.764	0.467	0.423	0	98.552	42.9011
gls	TS	LAKt07	g7	49.245	3.07	12.718	0.026	14.489	0.255	5.507	9.65	2.818	0.443	0.43	0.011	98.664	42.9527
gls	TS	LAKt07	g8	48.542	3.045	12.497	0.049	15.049	0.249	5.703	9.672	2.811	0.461	0.431	0.019	98.528	42.8805
gls	TS	LAKt07	g9	49.059	3.073	12.777	0.016	14.448	0.239	5.491	9.631	2.728	0.445	0.382	0.011	98.299	42.9509
gls	TS	LAKt07	g10	49.574	3.092	12.78	0.029	14.346	0.222	5.523	9.658	2.211	0.468	0.421	0.031	98.354	43.2671
gls	TS	LAKt07	g11	49.282	3.073	12.802	0.023	14.354	0.255	5.474	9.62	2.777	0.474	0.409	0.016	98.561	43.0349
		LAKt07	average	49.255	3.08064	12.7377	0.0228182	14.38	0.247455	5.50127	9.65227	2.77382	0.463727	0.424182	0.015	98.561	43.1123
gls	TS	LAKt23	g1	49.082	3.099	12.914	0.029	13.996	0.279	5.586	9.736	2.757	0.459	0.476	0.019	98.432	44.1539
gls	TS	LAKt23	g2	48.742	3.068	13	0.035	14.053	0.271	5.61	9.616	2.754	0.452	0.41	0.015	98.027	44.1594
gls	TS	LAKt23	g3	49.23	3.104	12.88	0.041	14.181	0.259	5.646	9.694	2.771	0.479	0.454	0.009	98.749	44.0936
gls	TS	LAKt23	g4	48.75	3.091	12.838	0.031	14.308	0.264	5.538	9.655	2.727	0.47	0.414	0.004	98.087	43.3989
gls	TS	LAKt23	g5	48.909	3.105	12.938	0.018	13.864	0.238	5.595	9.647	2.634	0.451	0.402	0.027	97.829	44.4274
gls	TS	LAKt23	g6	48.589	3.103	12.734	0.005	13.894	0.245	5.573	9.722	2.524	0.455	0.394	0.029	97.266	44.2768
gls	TS	LAKt23	g7	49.146	3.111	12.957	0.023	13.957	0.257	5.666	9.77	2.738	0.452	0.423	0.037	98.536	44.5738
gls	TS	LAKt23	g8	48.847	3.089	12.879	0.025	13.84	0.248	5.613	9.669	2.704	0.463	0.448	0.037	97.862	44.5495
gls	TS	LAKt23	g9	49.006	3.102	12.947	0.023	13.963	0.228	5.6	9.698	2.688	0.469	0.429	0.047	98.199	44.2739
gls	TS	LAKt23	g10	48.491	3.132	13.228	0.024	14.251	0.26	5.311	9.473	2.712	0.449	0.439	0.019	97.789	42.4713
gls	TS	LAKt23	g12	48.529	3.122	12.947	0.033	14.134	0.248	5.636	9.683	2.747	0.472	0.405	0.014	97.97	44.1317
gls	TS	LAKt23	g13	49.102	3.128	12.93	0.034	13.896	0.245	5.561	9.705	2.684	0.462	0.429	0.001	98.178	44.2201
		LAKt23	average	48.8686	3.1045	12.9327	0.02675	14.0281	0.2535	5.57792	9.67233	2.70333	0.461083	0.426917	0.0215	98.178	44.0618
gls	TS	LAKt24	g1	48.664	3.385	12.542	0.032	15.579	0.257	4.882	9.355	2.36	0.518	0.419	0.008	98	38.3013
gls	TS	LAKt24	g2	49.156	3.372	12.897	0.032	15.156	0.247	4.695	9.254	2.311	0.523	0.474	0.01	98.129	38.0292
gls	TS	LAKt24	g3	49.866	3.363	12.783	0.013	13.543	0.253	4.563	9.427	3.311	0.542	0.429	0.032	98.126	40.028
gls	TS	LAKt24	g4	49.092	3.474	12.612	0.021	14.953	0.26	4.694	9.032	2.656	0.527	0.465	0.018	97.803	38.3425
gls	TS	LAKt24	g5	49.118	3.146	12.821	0.017	14.117	0.246	5.494	9.699	2.697	0.47	0.405	0.001	98.233	43.5331
gls	TS	LAKt24	g6	49.371	3.169	12.819	0.02	13.532	0.258	5.37	9.415	2.813	0.495	0.44	0.025	97.727	44.0129
gls	TS	LAKt24	g7	48.732	3.393	12.608	0.007	15.601	0.272	4.845	9.366	2.274	0.5	0.465	0.006	98.067	38.0884
gls	TS	LAKt24	g8	48.946	3.134	12.886	0.021	14.309	0.219	5.537	9.598	2.698	0.45	0.444	0.024	98.266	43.3927
		LAKt24	average	49.1181	3.3045	12.746	0.020375	14.5987	0.2515	5.01	9.39325	2.64	0.503125	0.442625	0.0155	98.266	40.4702
gls	TS	LAKt25	g1	48.954	3.158	12.812	0.003	14.038	0.257	5.595	9.697	2.865	0.469	0.428	0.024	98.301	44.1197
gls	TS	LAKt25	g2	48.675	3.125	12.689	0.018	14.175	0.22	5.677	9.609	2.888	0.465	0.422	0.008	97.972	44.239
gls	TS	LAKt25	g3	48.374	3.143	12.717	0.016	14.276	0.237	5.545	9.551	2.742	0.457	0.436	0.023	97.517	43.4849
gls	TS	LAKt25	g4	47.951	3.203	12.636	0.037	15.161	0.257	5.275	9.455	2.711	0.435	0.452	0.022	97.595	40.802
gls	TS	LAKt25	g5	48.872	3.133	12.756	0.022	14.149	0.25	5.568	9.588	2.806	0.483	0.409	0.026	98.06	43.8065
gls	TS	LAKt25	g6	48.567	3.187	12.465	0.025	14.618	0.245	5.597	9.499	2.696	0.522	0.387	0.017	97.824	43.1328
gls	TS	LAKt25	g7	48.949	3.201	12.833	0.025	13.856	0.276	5.368	9.323	2.612	0.45	0.468	0.025	97.385	43.4215
		LAKt25	average	48.6203	3.16429	12.7011	0.0208571	14.3247	0.248857	5.51786	9.53171	2.76	0.468714	0.428857	0.0207143	97.8077	43.2866
phase	mount	sample	no.	SiO2	TiO2	Al2O3	Cr2O3	FeO	MnO	MgO	CaO	Na2O	K2O	P2O5	NiO	Total	An	An xtal av	An core	An rim	µm from core	type (c=clot, I=individual crystal)
plg	TS	LAK05	plg1r	51.801		29.513		0.79	0.017	0.172	13.217	3.976	0.124			99.686	64.751	68.0427	71.3344	64.751		c
plg	TS	LAK05	plg1c	49.938		30.685		0.758	0.009	0.185	14.667	3.257	0.085			99.642	71.3344					c
plg	TS	LAK05	plg2r	48.541		31.547		0.752	0.03	0.163	15.593	2.665	0.055			99.391	76.3778	76.9374	77.4971	76.3778		c
plg	TS	LAK05	plg2c	48.519		31.673		0.687	0.019	0.157	15.817	2.538	0.036			99.491	77.4971					c
plg	TS	LAK05	plg3r	47.012		32.974		0.734	0.012	0.147	16.864	1.941	0.048			99.753	82.7621	79.868	76.9738	82.7621		c
plg	TS	LAK05	plg3c	48.6		31.718		0.555	0.009	0.238	15.94	2.635	0.052			99.783	76.9738					c
plg	TS	LAK05	plg4r	49.249		31.113		0.836	0.026	0.178	15.071	2.931	0.061			99.518	73.9682	75.3332	76.6982	73.9682		c
plg	TS	LAK05	plg4c	48.257		31.322		0.702	0.012	0.165	15.57	2.614	0.051			98.736	76.6982					c
plg	TS	LAK05	plg5r	48.142		31.6		0.734	0.013	0.153	15.724	2.552	0.057			99.013	77.2977	82.1215	81.6827	77.2977		l
plg	TS	LAK05	plg5	46.577		32.775		0.658	0.012	0.131	17.094	1.883	0.027			99.17	83.3792					l
plg	TS	LAK05	plg5	45.921		33.5		0.671	0.01	0.119	17.57	1.564	0.033			99.407	86.1264					l
plg	TS	LAK05	plg5c	46.871		32.263		0.647	0.012	0.126	16.68	2.067	0.047			98.728	81.6827					l
plg	TS	LAK06	plg1r	51.297		29.339		0.802	0.039	0.188	13.56	3.853	0.096			99.242	66.0418	80.272	85.6749	66.0418	501.424	c
plg	TS	LAK06	plg1	48.837		30.88		0.809	0.014	0.185	15.464	2.728	0.06			99.024	75.8016				487.872	c
plg	TS	LAK06	plg1	50.001		30.163		0.777	0.028	0.186	14.473	3.282	0.061			99.03	70.9038				474.32	c
plg	TS	LAK06	plg1	48.913		30.698		0.749	0.014	0.176	15.362	2.773	0.059			98.797	75.3776				460.768	c
plg	TS	LAK06	plg1	49.354		30.85		0.755	0.015	0.171	14.934	2.976	0.073			99.178	73.4962				447.216	c
plg	TS	LAK06	plg1	49.664		30.61		0.748	0.014	0.178	14.858	3.087	0.069			99.271	72.6756				433.664	c
plg	TS	LAK06	plg1	48.199		31.276		0.749	0.026	0.152	15.703	2.583	0.063			98.783	77.0615				406.56	c
plg	TS	LAK06	plg1	48.012		31.094		0.713	0.028	0.16	15.533	2.575	0.066			98.215	76.9236				393.008	c
plg	TS	LAK06	plg1	47.28		32.104		0.703	0.014	0.141	16.365	2.187	0.043			98.862	80.526				379.456	c
plg	TS	LAK06	plg1	48.037		31.697		0.713	0.02	0.155	16.005	2.446	0.048			99.139	78.3356				365.904	c
plg	TS	LAK06	plg1	47.773		31.847		0.671	0	0.15	16.189	2.356	0.044			99.051	79.1543				352.352	c
plg	TS	LAK06	plg1	47.568		31.963		0.674	0.001	0.147	16.301	2.275	0.038			98.987	79.8369				338.8	c
plg	TS	LAK06	plg1	48.36		31.57		0.693	0.031	0.157	15.77	2.559	0.047			99.224	77.3009				325.248	c
plg	TS	LAK06	plg1	48.198		31.709		0.678	0.022	0.147	15.966	2.438	0.048			99.238	78.3498				311.696	c
plg	TS	LAK06	plg1	48.516		31.389		0.69	0.014	0.158	15.608	2.657	0.045			99.103	76.4493				298.144	c
plg	TS	LAK06	plg1	48.229		31.344		0.661	0.033	0.167	15.587	2.543	0.049			98.639	77.206				284.592	c
plg	TS	LAK06	plg1	48.407		31.66		0.669	0.03	0.149	15.774	2.591	0.041			99.358	77.0865				271.04	c
plg	TS	LAK06	plg1	47.696		32.192		0.692	0.019	0.139	16.287	2.28	0.043			99.376	79.7877				257.488	c
plg	TS	LAK06	plg1	48.156		32.056		0.659	0.025	0.143	16.028	2.443	0.05			99.594	78.3808				243.936	c
plg	TS	LAK06	plg1	48.177		31.488		0.664	0.014	0.153	15.821	2.55	0.044			98.925	77.4191				230.384	c
plg	TS	LAK06	plg1	48.261		31.581		0.669	0.015	0.141	15.821	2.439	0.056			98.995	78.1876				216.832	c
plg	TS	LAK06	plg1	47.693		32.188		0.668	0.025	0.142	16.266	2.297	0.04			99.355	79.6467				203.28	c
plg	TS	LAK06	plg1	46.768		32.772		0.642	0.007	0.126	17.007	1.857	0.022			99.221	83.5009				189.728	c
plg	TS	LAK06	plg1	45.661		33.564		0.603	0.008	0.109	17.829	1.4	0.024			99.21	87.5582				162.624	c
plg	TS	LAK06	plg1	45.621		33.693		0.578	0.007	0.105	17.927	1.415	0.014			99.363	87.5017				149.072	c
plg	TS	LAK06	plg1	45.666		33.543		0.565	0.021	0.106	17.795	1.402	0.033			99.14	87.5218				135.52	c
plg	TS	LAK06	plg1	45.823		33.533		0.591	0.015	0.094	17.806	1.439	0.017			99.331	87.2414				121.968	c
plg	TS	LAK06	plg1	45.902		33.445		0.569	0.006	0.108	17.58	1.585	0.013			99.215	85.9732				108.416	c
plg	TS	LAK06	plg1	46.044		33.075		0.566	0.009	0.122	17.547	1.643	0.024			99.041	85.5109				94.864	c
plg	TS	LAK06	plg1	46.149		33.28		0.566	0.001	0.105	17.474	1.621	0.014			99.22	85.6259				81.312	c
plg	TS	LAK06	plg1	45.573		33.115		0.558	0.015	0.109	17.29	1.608	0.033			98.325	85.5946				67.76	c
plg	TS	LAK06	plg1	46.26		33.419		0.559	0.019	0.104	17.424	1.638	0.016			99.443	85.4614				54.208	c
plg	TS	LAK06	plg1	46.06		33.224		0.575	0.003	0.11	17.522	1.634	0.024			99.166	85.5612				40.656	c
plg	TS	LAK06	plg1	46.047		33.097		0.571	0.014	0.11	17.51	1.599	0.025			98.977	85.8183				27.104	c
plg	TS	LAK06	plg1	46.212		33.403		0.559	0.024	0.108	17.397	1.657	0.03			99.398	85.2981				13.552	c
plg	TS	LAK06	plg1c	46.144		33.222		0.575	0.02	0.106	17.479	1.615	0.031			99.206	85.6749				0	c
plg	TS	LAK06	plg2r	47.952		30.893		0.784	0.009	0.193	15.611	2.667	0.047			98.202	76.385	84.1196	84.8109	76.385	371.956	c
plg	TS	LAK06	plg2	48.478		31.285		0.729	0	0.193	15.642	2.632	0.05			99.046	76.658				357.65	c
plg	TS	LAK06	plg2	47.954		31.731		0.763	0.029	0.176	15.977	2.476	0.047			99.196	78.0981				343.344	c
plg	TS	LAK06	plg2	48.365		31.486		0.746	0.007	0.177	15.726	2.579	0.044			99.161	77.1147				329.038	c
plg	TS	LAK06	plg2	48.076		31.693		0.732	0.012	0.177	15.97	2.467	0.052			99.199	78.1528				314.732	c
plg	TS	LAK06	plg2	48.708		30.876		0.679	0.007	0.194	15.359	2.839	0.057			98.754	74.9347				300.426	c
plg	TS	LAK06	plg2	45.44		33.228		0.641	0.005	0.134	17.986	1.337	0.018			98.8	88.1431				271.814	c
plg	TS	LAK06	plg2	45.438		33.423		0.594	0.002	0.11	17.834	1.389	0.024			98.812	87.6469				257.508	c
plg	TS	LAK06	plg2	45.715		33.511		0.569	0.029	0.11	17.77	1.479	0.026			99.214	86.9101				243.202	c
plg	TS	LAK06	plg2	45.902		33.321		0.525	0.006	0.111	17.501	1.584	0.029			98.986	85.9264				228.896	c
plg	TS	LAK06	plg2	46.056		33.188		0.524	0	0.106	17.532	1.574	0.025			99.016	86.0241				214.59	c
plg	TS	LAK06	plg2	45.853		33.438		0.572	0.002	0.096	17.604	1.518	0.024			99.116	86.5019				200.284	c
plg	TS	LAK06	plg2	45.843		33.029		0.562	0	0.113	17.609	1.502	0.023			98.692	86.6284				185.978	c
plg	TS	LAK06	plg2	45.826		33.462		0.526	0.014	0.113	17.669	1.469	0.029			99.117	86.9224				171.672	c
plg	TS	LAK06	plg2	45.559		33.357		0.521	0.004	0.102	17.615	1.473	0.023			98.655	86.8566				157.366	c
plg	TS	LAK06	plg2	45.418		32.91		0.558	0.003	0.134	17.756	1.496	0.019			98.3	86.7705				143.06	c
plg	TS	LAK06	plg2	45.401		33.204		0.565	0	0.139	17.62	1.469	0.032			98.447	86.8908				128.754	c
plg	TS	LAK06	plg2	45.441		33.033		0.533	0.016	0.132	17.742	1.47	0.025			98.417	86.9615				114.448	c
plg	TS	LAK06	plg2	45.478		33.265		0.565	0.007	0.154	17.859	1.46	0.029			98.824	87.1127				100.142	c
plg	TS	LAK06	plg2	45.532		33.002		0.537	0.024	0.146	17.629	1.571	0.022			98.476	86.1131				57.224	c
plg	TS	LAK06	plg2	45.815		32.753		0.569	0	0.142	17.513	1.574	0.018			98.383	86.0111				42.918	c
plg	TS	LAK06	plg2	45.507		33.144		0.541	0.019	0.127	17.68	1.461	0.021			98.513	86.9914				28.612	c
plg	TS	LAK06	plg2	46.286		32.62		0.568	0.009	0.14	17.185	1.768	0.038			98.629	84.3047				14.306	c
plg	TS	LAK06	plg2c	46.032		33.031		0.579	0.04	0.156	17.339	1.716	0.033			98.929	84.8109				0	c
plg	TS	LAK11	plg3r	48.301		31.574		0.786	0.025	0.161	15.758	2.659	0			99.301	76.6076	77.5554	78.0208	76.6076		c
plg	TS	LAK11	plg3	47.612		31.635		0.773	0.01	0.152	16.011	2.49	0.012			98.74	78.0379					c
plg	TS	LAK11	plg3c	47.612		31.635		0.709	0.014	0.152	15.995	2.49	0.012			98.899	78.0208					c
plg	TS	LAK11	plg4r	48.262		31.399		0.764	0.005	0.156	15.766	2.677	0.02			99.089	76.4956	74.3941	72.2925	76.4956		c
plg	TS	LAK11	plg4c	48.923		30.483		0.733	0	0.174	14.887	3.153	0.014			98.444	72.2925					c
plg	TS	LAK12	plg1r	51.413		29.227		0.8	0.009	0.194	13.295	3.877	0.087			98.967	65.4575	74.9229	76.6998	65.4575	256.392	l
plg	TS	LAK12	plg1	50.457		29.531		0.781	0.008	0.171	13.986	3.521	0.075			98.586	68.7014				245.709	l
plg	TS	LAK12	plg1	51.704		29.008		0.733	0.01	0.203	13.144	3.978	0.086			98.941	64.613				235.026	l
plg	TS	LAK12	plg1	48.843		30.9		0.783	0.035	0.169	15.304	2.817	0.052			98.94	75.0134				224.343	l
plg	TS	LAK12	plg1	48.589		31.102		0.75	0.022	0.18	15.443	2.728	0.046			98.91	75.7766				213.66	l
plg	TS	LAK12	plg1	48.705		31.029		0.733	0.008	0.171	15.375	2.774	0.046			98.885	75.3866				202.977	l
plg	TS	LAK12	plg1	48.811		30.765		0.714	0.01	0.165	15.138	2.822	0.061			98.54	74.775				192.294	l
plg	TS	LAK12	plg1	49.067		30.901		0.739	0.016	0.176	15.149	2.913	0.06			99.06	74.1856				181.611	l
plg	TS	LAK12	plg1	48.307		31.243		0.749	0.033	0.162	15.691	2.623	0.041			98.878	76.7751				170.928	l
plg	TS	LAK12	plg1	49.153		30.361		0.711	0.016	0.169	15.099	2.941	0.053			98.544	73.9383				160.245	l
plg	TS	LAK12	plg1	46.845		32.396		0.702	0.008	0.136	16.83	1.984	0.031			98.957	82.4181				149.562	l
plg	TS	LAK12	plg1	46.887		32.266		0.74	0	0.136	16.647	2.053	0.041			98.787	81.7547				138.879	l
plg	TS	LAK12	plg1	48.097		31.099		0.723	0.03	0.158	15.67	2.488	0.043			98.339	77.6807				128.196	l
plg	TS	LAK12	plg1	49.996		30.163		0.707	0.019	0.178	14.495	3.268	0.062			98.938	71.0232				117.513	l
plg	TS	LAK12	plg1	48.063		31.543		0.722	0.021	0.169	15.762	2.489	0.06			98.864	77.7751				85.464	l
plg	TS	LAK12	plg1	48.433		31.089		0.698	0.016	0.18	15.497	2.581	0.06			98.59	76.841				74.781	l
plg	TS	LAK12	plg1	48.715		30.626		0.696	0.018	0.179	15.343	2.836	0.063			98.515	74.935				53.415	l
plg	TS	LAK12	plg1	48.619		31.161		0.732	0.009	0.177	15.409	2.704	0.05			98.896	75.8982				42.732	l
plg	TS	LAK12	plg1	48.112		31.075		0.705	0.017	0.171	15.584	2.62	0.056			98.365	76.6733				21.366	l
plg	TS	LAK12	plg1	48.163		31.06		0.737	0.016	0.164	15.725	2.587	0.057			98.551	77.0589				10.683	l
plg	TS	LAK12	plg1c	48.29		31.259		0.738	0.025	0.151	15.619	2.622	0.054			98.795	76.6998				0	l
plg	TS	LAK12	plg3r	52.286		29.015		0.777	0.027	0.173	12.91	4.166	0.098			99.531	63.1331	74.0507	78.7843	63.1331	481.045	l
plg	TS	LAK12	plg3	51.067		29.582		0.736	0.008	0.189	13.736	3.715	0.092			99.178	67.1401				460.13	l
plg	TS	LAK12	plg3	50.757		30.025		0.758	0.025	0.193	14.007	3.572	0.084			99.473	68.4238				439.215	l
plg	TS	LAK12	plg3	48.08		31.584		0.735	0.005	0.169	15.997	2.419	0.041			99.074	78.515				397.385	l
plg	TS	LAK12	plg3	48.608		31.442		0.687	0.012	0.183	15.628	2.659	0.045			99.304	76.4588				376.47	l
plg	TS	LAK12	plg3	48.581		31.336		0.711	0.005	0.174	15.569	2.682	0.054			99.145	76.235				355.555	l
plg	TS	LAK12	plg3	48.688		31.271		0.713	0.024	0.173	15.534	2.681	0.066			99.18	76.2009				334.64	l
plg	TS	LAK12	plg3	48.291		31.483		0.73	0.027	0.171	15.778	2.583	0.046			99.152	77.1456				313.725	l
plg	TS	LAK12	plg3	48.672		31.166		0.702	0.026	0.176	15.53	2.756	0.044			99.113	75.6922				292.81	l
plg	TS	LAK12	plg3	49.969		30.148		0.703	0.024	0.193	14.426	3.349	0.062			98.931	70.4174				271.895	l
plg	TS	LAK12	plg3	50.094		30.344		0.724	0.019	0.207	14.419	3.297	0.085			99.238	70.7323				250.98	l
plg	TS	LAK12	plg3	49.801		30.405		0.674	0.016	0.205	14.593	3.267	0.064			99.063	71.168				230.065	l
plg	TS	LAK12	plg3	49.062		31.035		0.72	0.007	0.184	15.227	2.843	0.054			99.175	74.7457				209.15	l
plg	TS	LAK12	plg3	48.366		31.121		0.708	0.011	0.178	15.696	2.596	0.053			98.765	76.9647				188.235	l
plg	TS	LAK12	plg3	48.8		29.717		1.028	0.009	0.407	15.355	2.794	0.095			98.323	75.2288				167.32	l
plg	TS	LAK12	plg3	48.492		31.071		0.728	0.016	0.171	15.382	2.693	0.052			98.638	75.9406				146.405	l
plg	TS	LAK12	plg3	49.525		30.426		0.749	0.017	0.174	14.685	3.142	0.067			98.827	72.0884				125.49	l
plg	TS	LAK12	plg3	48.685		31.045		0.728	0.013	0.16	15.368	2.807	0.057			98.909	75.158				83.66	l
plg	TS	LAK12	plg3	48.256		31.427		0.734	0.022	0.159	15.788	2.528	0.046			98.993	77.5339				62.745	l
plg	TS	LAK12	plg3	47.698		31.628		0.705	0.02	0.16	16.128	2.4	0.037			98.813	78.7843				41.83	l
plg	TS	LAK12	plg3	48.253		31.248		0.704	0.018	0.171	15.648	2.531	0.052			98.659	77.3576				20.915	l
plg	TS	LAK20	plg1r	48.018		31.384		0.774	0.021	0.164	15.888	2.484	0.055			98.831	77.947	76.439	72.4554	77.947		c
plg	TS	LAK20	plg1	47.917		31.766		0.697	0.03	0.158	16.065	2.372	0.05			99.101	78.9148					c
plg	TS	LAK20	plg1c	49.917		30.742		0.714	0.016	0.181	14.885	3.127	0.063			99.686	72.4554					c
plg	TS	LAK20	plg2r	51.111		29.316		0.795	0.013	0.194	13.634	3.711	0.093			98.926	66.9992	69.5948	72.1904	66.9992		c
plg	TS	LAK20	plg2c	49.749		30.371		0.758	0.017	0.194	14.708	3.131	0.08			99.053	72.1904					c
plg	TS	LAK20	plg3r	47.993		31.387		0.779	0.027	0.165	15.848	2.555	0.046			98.835	77.4147	81.6822	82.9349	77.4147		c
plg	TS	LAK20	plg3	46.322		33.031		0.656	0.019	0.129	17.327	1.73	0.027			99.261	84.697					c
plg	TS	LAK20	plg3c	46.923		32.335		0.671	0.025	0.138	16.868	1.918	0.025			98.926	82.9349					c
plg	TS	LAK20	plg6r	48.275		31.608		0.728	0	0.169	15.937	2.55	0.042			99.343	77.5466	76.837	76.1274	77.5466		c
plg	TS	LAK20	plg6c	48.579		31.008		0.728	0.017	0.182	15.627	2.708	0.056			98.947	76.1274					c
plg	TS	LAK20	plg5rGM	52.343		29.177		0.887	0.037	0.18	13.006	4.175	0.118			100.003	63.2552	63.3538	63.4524	63.2552		l
plg	TS	LAK20	plg5cGM	52.262		28.823		0.858	0	0.182	12.985	4.133	0.102			99.423	63.4524					l
plg	TS	LAK28	plg2r	50.142		29.49		0.89	0.015	0.162	13.958	3.674	0.1			98.494	67.7358	72.3184	74.1361	67.7358	142.273	c
plg	TS	LAK28	plg2	50.115		29.423		0.828	0.013	0.164	13.995	3.523	0.1			98.215	68.703				133.904	c
plg	TS	LAK28	plg2	47.717		30.955		0.831	0.021	0.131	15.729	2.577	0.058			98.067	77.1318				125.535	c
plg	TS	LAK28	plg2	48.911		30.15		0.819	0.026	0.14	14.915	3.227	0.077			98.309	71.8635				117.166	c
plg	TS	LAK28	plg2	48.637		30.261		0.836	0.015	0.106	15.084	3.08	0.09			98.157	73.0191				108.797	c
plg	TS	LAK28	plg2	50.834		29.057		0.826	0.028	0.177	13.558	3.832	0.107			98.467	66.161				100.428	c
plg	TS	LAK28	plg2	50.433		29.525		0.799	0.03	0.162	13.97	3.695	0.096			98.766	67.6299				92.059	c
plg	TS	LAK28	plg2	50.045		29.334		0.797	0.033	0.138	13.987	3.549	0.112			98.053	68.5324				75.321	c
plg	TS	LAK28	plg2	48.305		30.499		0.802	0.022	0.17	15.319	2.814	0.065			98.041	75.0517				58.583	c
plg	TS	LAK28	plg2	48.509		31.043		0.728	0.02	0.159	15.605	2.617	0.061			98.785	76.7179				41.845	c
plg	TS	LAK28	plg2	48.583		30.732		0.748	0.015	0.157	15.054	2.645	0.074			98.054	75.8754				33.476	c
plg	TS	LAK28	plg2	48.372		30.591		0.715	0.013	0.174	15.367	2.765	0.054			98.109	75.4372				25.107	c
plg	TS	LAK28	plg2	48.342		30.503		0.748	0.009	0.183	15.27	2.894	0.069			98.064	74.4623				16.738	c
plg	TS	LAK28	plg2	48.856		30.406		0.748	0.01	0.181	15.167	2.924	0.065			98.393	74.1361				8.369	c
plg	TS	LAK28	plg3r	48.022		30.928		0.669	0.01	0.184	15.664	2.657	0.054			98.223	76.5137	77.762	74.7946	76.5137	64.204	c
plg	TS	LAK28	plg3	47.595		31.167		0.653	0	0.168	15.98	2.466	0.04			98.087	78.1704				48.153	c
plg	TS	LAK28	plg3	47.116		31.897		0.639	0.014	0.156	16.559	2.263	0.047			98.704	80.1727				32.102	c
plg	TS	LAK28	plg3	47.174		31.714		0.653	0.004	0.153	16.262	2.366	0.044			98.401	79.1587				16.051	c
plg	TS	LAK28	plg3c	48.744		30.9		0.616	0	0.183	15.39	2.866	0.068			98.79	74.7946				0	c
plg	TS	LAK28	plg5	48.72		30.267		0.825	0.001	0.11	14.958	3.016	0.076			98.005	73.2668	81.7378	82.7833	73.2668	158.367	c
plg	TS	LAK28	plg5	46.445		31.894		0.77	0.013	0.085	16.794	1.998	0.048			98.076	82.2848				100.779	c
plg	TS	LAK28	plg5	46.102		32.113		0.783	0.005	0.101	16.961	1.896	0.039			98.02	83.1746				86.382	c
plg	TS	LAK28	plg5	46.243		32.167		0.746	0.016	0.099	16.865	1.975	0.046			98.175	82.5139				57.588	c
plg	TS	LAK28	plg5	45.941		32.37		0.763	0.017	0.095	17.143	1.769	0.038			98.159	84.2648				43.191	c
plg	TS	LAK28	plg5	46.289		32.318		0.763	0.016	0.088	16.9	1.92	0.036			98.359	82.947				28.794	c
plg	TS	LAK28	plg5	46.194		32.318		0.75	0.022	0.096	16.882	1.956	0.048			98.288	82.6673				14.397	c
plg	TS	LAK28	plg5c	46.417		32.362		0.755	0.014	0.087	16.95	1.948	0.05			98.6	82.7833				0	c
plg	TS	LAK28	plg6	48.124		30.939		0.747	0.009	0.128	15.5	2.819	0.067			98.368	75.2379	78.1356	84.9515	-75.2379	376.006	c
plg	TS	LAK28	plg6	47.623		31.319		0.72	0.006	0.13	15.957	2.53	0.058			98.362	77.7051				331.77	c
plg	TS	LAK28	plg6	47.831		31.166		0.751	0.017	0.132	15.931	2.517	0.068			98.445	77.766				309.652	c
plg	TS	LAK28	plg6	46.552		32.18		0.624	0.018	0.162	17.073	1.939	0.046			98.611	82.9517				265.416	c
plg	TS	LAK28	plg6	47.933		31.072		0.632	0.019	0.201	15.609	2.512	0.048			98.046	77.4457				243.298	c
plg	TS	LAK28	plg6	48.4		30.78		0.631	0.001	0.228	15.413	2.818	0.055			98.352	75.1396				221.18	c
plg	TS	LAK28	plg6	49.044		30.475		0.63	0.018	0.227	15.146	3.018	0.055			98.644	73.4978				199.062	c
plg	TS	LAK28	plg6	48.475		30.743		0.642	0.005	0.214	15.388	2.774	0.049			98.324	75.4023				176.944	c
plg	TS	LAK28	plg6	49.221		30.418		0.645	0.009	0.23	14.89	3.073	0.056			98.581	72.8084				154.826	c
plg	TS	LAK28	plg6	47.863		31.21		0.661	0.026	0.21	15.863	2.511	0.056			98.426	77.7333				132.708	c
plg	TS	LAK28	plg6	47.864		31.187		0.634	0.002	0.208	15.821	2.596	0.045			98.379	77.105				110.59	c
plg	TS	LAK28	plg6	46.568		32.013		0.625	0.012	0.176	16.87	1.949	0.036			98.274	82.7085				88.472	c
plg	TS	LAK28	plg6	46.489		32.292		0.634	0.02	0.165	16.888	1.942	0.026			98.484	82.7751				66.354	c
plg	TS	LAK28	plg6	45.877		32.617		0.648	0.036	0.164	17.387	1.702	0.026			98.475	84.9515				44.236	c
plg	TS	LAK28	plg6	47.669		31.426		0.645	0.01	0.192	16.062	2.387	0.043			98.466	78.8066				22.118	c
plg	TS	LAK28	plg1r	49.887		30.073		0.826	0.015	0.135	14.391	3.428	0.095			98.91	69.8783	81.6746	84.0897	69.8783	222.736	l
plg	TS	LAK28	plg1	47.38		31.732		0.651	0.003	0.178	16.348	2.289	0.042			98.665	79.7844				167.052	l
plg	TS	LAK28	plg1	47.505		31.648		0.627	0.015	0.166	16.331	2.329	0.048			98.715	79.4866				139.21	l
plg	TS	LAK28	plg1	47.641		31.838		0.638	0.014	0.161	16.245	2.38	0.05			99.008	79.0438				111.368	l
plg	TS	LAK28	plg1	46.988		32.027		0.639	0.015	0.16	16.659	2.101	0.034			98.658	81.4183				83.526	l
plg	TS	LAK28	plg1	46.616		32.561		0.646	0.013	0.145	17.006	1.9	0.035			98.952	83.1822				55.684	l
plg	TS	LAK28	plg1	46.279		32.657		0.605	0.032	0.144	17.361	1.737	0.032			98.886	84.67				27.842	l
plg	TS	LAK28	plg1c	46.289		32.607		0.645	0.01	0.141	17.187	1.797	0.025			98.737	84.0897				0	l
plg	TS	LAK28	plg1	46.134		32.644		0.611	0	0.138	17.288	1.765	0.043			98.636	84.4059				27.842	l
plg	TS	LAK28	plg1	45.874		32.948		0.601	0.026	0.136	17.411	1.654	0.03			98.698	85.3309				55.684	l
plg	TS	LAK28	plg1	46.102		32.757		0.631	0.017	0.144	17.387	1.677	0.03			98.768	85.1397				83.526	l
plg	TS	LAK28	plg1	46.17		32.857		0.603	0.012	0.134	17.315	1.745	0.034			98.9	84.5757				111.368	l
plg	TS	LAK28	plg1	46.382		32.743		0.627	0.017	0.154	17.21	1.818	0.037			99.01	83.9517				139.21	l
plg	TS	LAK28	plg1	46.115		32.777		0.637	0.001	0.143	17.261	1.79	0.036			98.785	84.1991				167.052	l
plg	TS	LAK28	plg1r	48.386		31.349		0.717	0.03	0.181	15.658	2.738	0.059			99.155	75.9628				222.736	l
plg	TS	LAK28	plg4r	53.959		26.891		0.888	0.015	0.121	10.942	5.354	0.221			98.521	53.0375	64.2163	75.912	53.0375	406.714	l
plg	TS	LAK28	plg4	51.017		28.523		0.801	0.004	0.161	13.191	4.154	0.096			98.018	63.6996				363.902	l
plg	TS	LAK28	plg4	47.989		30.677		0.744	0.011	0.178	15.586	2.733	0.072			98.027	75.912				278.278	l
plg	TS	LAK29	plg2r	45.796		33.142		0.581	0.001	0.101	17.623	1.484	0.028			98.769	86.7766	86.4321	87.1657	86.7766	373.52	c
plg	TS	LAK29	plg2	45.692		33.166		0.577	0.004	0.101	17.566	1.533	0.031			98.671	86.3612				360.64	c
plg	TS	LAK29	plg2	45.737		33.037		0.585	0.001	0.109	17.496	1.566	0.029			98.567	86.0606				347.76	c
plg	TS	LAK29	plg2	46.019		32.95		0.586	0.01	0.116	17.381	1.679	0.027			98.775	85.1203				334.88	c
plg	TS	LAK29	plg2	45.548		33.133		0.606	0.023	0.104	17.654	1.473	0.021			98.562	86.8818				322	c
plg	TS	LAK29	plg2	45.686		33.263		0.588	0.017	0.11	17.611	1.489	0.031			98.796	86.7301				309.12	c
plg	TS	LAK29	plg2	45.791		33.102		0.593	0.009	0.114	17.602	1.52	0.021			98.753	86.4852				296.24	c
plg	TS	LAK29	plg2	45.463		33.149		0.605	0.02	0.104	17.734	1.451	0.028			98.568	87.1032				283.36	c
plg	TS	LAK29	plg2	45.536		33.2		0.586	0.018	0.106	17.65	1.471	0.025			98.597	86.8947				270.48	c
plg	TS	LAK29	plg2	45.478		33.159		0.587	0.013	0.112	17.66	1.46	0.028			98.504	86.9863				257.6	c
plg	TS	LAK29	plg2	45.496		33.271		0.589	0.026	0.106	17.628	1.464	0.023			98.612	86.9347				244.72	c
plg	TS	LAK29	plg2	45.586		33.064		0.583	0.023	0.102	17.583	1.525	0.027			98.494	86.4341				231.84	c
plg	TS	LAK29	plg2	45.681		32.963		0.579	0.003	0.115	17.622	1.506	0.014			98.494	86.6062				218.96	c
plg	TS	LAK29	plg2	45.518		32.858		0.572	0.009	0.116	17.549	1.545	0.01			98.177	86.2577				206.08	c
plg	TS	LAK29	plg2	45.563		32.862		0.584	0.006	0.103	17.474	1.555	0.024			98.174	86.1299				193.2	c
plg	TS	LAK29	plg2	46.068		32.933		0.623	0	0.119	17.367	1.597	0.034			98.741	85.7335				180.32	c
plg	TS	LAK29	plg2	45.924		32.928		0.594	0.012	0.106	17.378	1.646	0.027			98.628	85.3678				167.44	c
plg	TS	LAK29	plg2	46.123		32.803		0.606	0.014	0.109	17.27	1.655	0.033			98.619	85.2212				154.56	c
plg	TS	LAK29	plg2	46.114		32.774		0.588	0.012	0.117	17.269	1.703	0.026			98.606	84.8567				141.68	c
plg	TS	LAK29	plg2	46.101		32.76		0.63	0.028	0.109	17.281	1.631	0.03			98.573	85.4122				128.8	c
plg	TS	LAK29	plg2	45.674		33.126		0.622	0.011	0.116	17.577	1.559	0.026			98.714	86.1694				115.92	c
plg	TS	LAK29	plg2	45.67		33.129		0.582	0.002	0.107	17.688	1.522	0.026			98.726	86.5267				103.04	c
plg	TS	LAK29	plg2	45.654		33.013		0.598	0.012	0.103	17.685	1.478	0.025			98.577	86.8631				90.16	c
plg	TS	LAK29	plg2	45.56		33.177		0.569	0.007	0.104	17.764	1.439	0.032			98.658	87.2151				77.28	c
plg	TS	LAK29	plg2	45.484		33.061		0.589	0.013	0.104	17.777	1.445	0.017			98.49	87.1768				51.52	c
plg	TS	LAK29	plg2	45.274		32.917		0.563	0.021	0.101	17.614	1.49	0.04			98.026	86.7244				38.64	c
plg	TS	LAK29	plg2	45.433		33.044		0.579	0.028	0.102	17.679	1.455	0.025			98.35	87.0373				25.76	c
plg	TS	LAK29	plg2	45.465		33.025		0.607	0.029	0.092	17.625	1.417	0.021			98.283	87.299				12.88	c
plg	TS	LAK29	plg2c	45.69		33.312		0.608	0.002	0.108	17.784	1.447	0.022			98.983	87.1657				0	c
plg	TS	LAK29	plg3r	51.959		29.19		0.781	0.008	0.178	13.176	3.965	0.096			99.42	64.7433	79.0032	82.9682	64.7433		c
plg	TS	LAK29	plg3	48.492		30.787		0.756	0.019	0.168	15.504	2.61	0.062			98.428	76.6497					c
plg	TS	LAK29	plg3	48.468		31.211		0.733	0.02	0.178	15.658	2.554	0.057			98.912	77.21					c
plg	TS	LAK29	plg3	48.469		31.324		0.728	0.004	0.168	15.548	2.595	0.07			98.94	76.8032					c
plg	TS	LAK29	plg3	47.618		31.911		0.717	0.014	0.157	16.158	2.256	0.053			98.922	79.8301					c
plg	TS	LAK29	plg3	47.471		32.001		0.7	0.032	0.152	16.533	2.081	0.04			99.04	81.4481					c
plg	TS	LAK29	plg3	47.279		32.123		0.722	0.007	0.145	16.392	2.06	0.044			98.809	81.4719					c
plg	TS	LAK29	plg3	47.38		31.992		0.731	0.011	0.159	16.47	2.083	0.038			98.889	81.3758					c
plg	TS	LAK29	plg3	47.206		32.407		0.703	0.01	0.164	16.721	1.973	0.034			99.232	82.4045					c
plg	TS	LAK29	plg3	48.297		31.863		0.711	0.025	0.165	16.094	2.353	0.033			99.562	79.0781					c
plg	TS	LAK29	plg3	47.473		32.554		0.721	0.025	0.155	16.846	1.911	0.036			99.751	82.9682					c
plg	TS	LAK29	plg3	47.97		31.946		0.707	0.002	0.162	16.24	2.222	0.032			99.307	80.1541					c
plg	TS	LAK29	plg3	47.561		32.299		0.714	0	0.162	16.429	2.108	0.03			99.325	81.1562					c
plg	TS	LAK29	plg3	47.289		32.523		0.691	0.012	0.146	16.757	1.969	0.032			99.451	82.465					c
plg	TS	LAK29	plg3	47.463		32.542		0.71	0.017	0.159	16.665	2.026	0.04			99.656	81.9673					c
plg	TS	LAK29	plg3	49.159		31.248		0.709	0.031	0.185	15.364	2.756	0.061			99.546	75.4939					c
plg	TS	LAK29	plg3	48.302		31.866		0.731	0.012	0.172	16.034	2.38	0.05			99.577	78.8265					c
plg	TS	LAK29	plg3r	47.972		31.151		0.793	0.032	0.166	15.569	2.425	0.056			98.221	78.0115					c
plg	TS	LAK29	plg1rGM	52.999		28.524		0.917	0.018	0.179	12.319	4.44	0.128			99.624	60.5246	65.446	66.5563	60.5246	113.175	l
plg	TS	LAK29	plg1GM	51.913		29.127		0.884	0.022	0.195	13.228	3.968	0.106			99.521	64.816				100.6	l
plg	TS	LAK29	plg1GM	51.8		29.24		0.865	0.02	0.208	13.337	3.96	0.085			99.587	65.0488				88.025	l
plg	TS	LAK29	plg1GM	51.548		29.316		0.888	0.018	0.208	13.407	3.883	0.082			99.417	65.6121				75.45	l
plg	TS	LAK29	plg1GM	50.65		29.028		0.75	0.029	0.192	13.515	3.717	0.09			98.045	66.7693				62.875	l
plg	TS	LAK29	plg1GM	50.118		29.579		0.791	0.012	0.185	13.993	3.515	0.083			98.339	68.7488				37.725	l
plg	TS	LAK29	plg1GM	51.625		29.164		0.82	0.021	0.189	13.337	3.895	0.088			99.212	65.4241				25.15	l
plg	TS	LAK29	plg1GM	51.719		29.307		0.81	0.019	0.201	13.373	3.89	0.084			99.479	65.5141				12.575	l
plg	TS	LAK29	plg1cGM	51.164		29.509		0.821	0	0.195	13.631	3.785	0.092			99.257	66.5563				0	l
plg	PM	LAKt07	plg1c	52.28		28.378		1.3	0.012	0.356	12.694	4.28	0.111			99.587	62.1063					n/a
plg	PM	LAKt07	plg1r	53.179		28.113		0.974	0.014	0.287	11.901	4.729	0.141			99.469	58.1709					n/a
plg	PM	LAKt07	plg2c	51.977		28.95		0.95	0.007	0.184	12.845	4.258	0.106			99.356	62.505					n/a
plg	PM	LAKt07	plg2r	51.771		28.968		0.937	0.013	0.203	12.963	4.206	0.103			99.238	63.006					n/a
plg	PM	LAKt07	plg3c	52.064		29.13		1.021	0.024	0.191	12.872	4.302	0.096			99.777	62.3131					n/a
plg	PM	LAKt07	plg3c	52.139		28.752		1.02	0.018	0.199	12.678	4.336	0.098			99.32	61.7701					n/a
plg	PM	LAKt07	plg3r	52.181		29.029		0.924	0.019	0.177	12.649	4.328	0.095			99.473	61.7596					n/a
plg	PM	LAKt07	plg3r	52.221		28.843		0.948	0	0.179	12.68	4.412	0.115			99.497	61.3627					n/a
plg	PM	LAKt07	plg4c	53.114		28.595		1.021	0.028	0.198	12.125	4.586	0.127			99.893	59.3667					n/a
plg	PM	LAKt07	plg4r	51.665		29.228		0.994	0.018	0.18	13.052	4.064	0.109			99.39	63.9607					n/a
plg	PM	LAKt07	plg5c	53.042		28.309		0.927	0	0.179	12.083	4.726	0.127			99.479	58.5552					n/a
plg	PM	LAKt07	plg5r	53.232		28.511		0.973	0.002	0.19	12.139	4.574	0.131			99.842	59.4577					n/a
plg	PM	LAKt23	plg1r	52.399		28.496		1.084	0.019	0.207	12.596	4.45	0.116			99.47	61.0011					n/a
plg	PM	LAKt23	plg1c	51.647		29.265		0.956	0.022	0.199	13.204	4.14	0.098			99.615	63.8004					n/a
plg	PM	LAKt23	plg2r	51.842		28.777		1.061	0.015	0.256	12.798	4.325	0.104			99.308	62.0521					n/a
plg	PM	LAKt23	plg2c	51.615		29.2		0.993	0.02	0.196	13.169	4.136	0.096			99.526	63.7614					n/a
plg	PM	LAKt23	plg3r	51.277		28.987		0.981	0.012	0.22	13.006	4.209	0.109			98.909	63.0665					n/a
plg	PM	LAKt23	plg3c	51.508		28.866		1.022	0.004	0.266	13.181	4.171	0.104			99.257	63.5875					n/a
plg	PM	LAKt23	plg4r	52.082		28.85		1.059	0.03	0.215	12.866	4.345	0.111			99.65	62.0683					n/a
plg	PM	LAKt23	plg4c	51.827		28.95		0.984	0.015	0.205	12.872	4.333	0.104			99.384	62.1443					n/a
plg	PM	LAKt23	plg5r	49.093		28.425		0.771	0.022	0.171	12.12	4.145	0.079			94.896	61.771					n/a
plg	PM	LAKt23	plg6r	51.684		28.404		1.216	0.011	0.263	12.516	4.418	0.103			98.726	61.0213					n/a
plg	PM	LAKt23	plg6c	51.824		29.123		0.948	0.026	0.197	12.964	4.225	0.105			99.475	62.9026					n/a
plg	PM	LAKt23	plg7r	52.144		28.616		1.05	0.026	0.211	12.646	4.438	0.112			99.345	61.1595					n/a
plg	PM	LAKt24	plg1r	52.558		28.496		1.018	0.039	0.207	12.382	4.668	0.12			99.589	59.4451					n/a
plg	PM	LAKt24	plg1c	51.858		29.111		0.98	0.02	0.212	13.07	4.226	0.098			99.675	63.087					n/a
plg	PM	LAKt24	plg3c	49.402		30.937		0.994	0.027	0.162	15.057	3.084	0.069			99.784	72.9582					n/a
plg	PM	LAKt24	plg4r	51.688		29.048		1.131	0.013	0.222	12.995	4.105	0.086			99.42	63.6278					n/a
plg	PM	LAKt24	plg4c	51.564		29.009		1.091	0.02	0.206	13.024	4.183	0.097			99.294	63.2429					n/a
plg	PM	LAKt24	plg5r	50.611		29.274		1	0	0.197	13.467	4.044	0.096			98.777	64.7916					n/a
plg	PM	LAKt24	plg5c	51.365		28.769		1.059	0.012	0.213	12.954	4.274	0.101			98.845	62.6151					n/a
plg	PM	LAKt24	plg6r	52.054		27.787		1.767	0.019	0.363	12.469	4.619	0.121			99.534	59.8676					n/a
plg	PM	LAKt24	plg6c	51.883		28.649		0.989	0.026	0.193	12.622	4.453	0.115			99.033	61.0342					n/a
plg	PM	LAKt24	plg7r	51.927		28.748		1.119	0.009	0.204	12.797	4.352	0.104			99.356	61.9036					n/a
plg	PM	LAKt24	plg7c	51.187		28.877		1.109	0.009	0.182	12.904	4.287	0.113			98.76	62.4533					n/a
plg	PM	LAKt24	plg8r	51.196		29.142		0.998	0.025	0.187	13.066	4.24	0.104			99.04	63.0028					n/a
plg	PM	LAKt24	plg8r	51.833		28.762		0.975	0.034	0.193	12.864	4.37	0.1			99.225	61.9295					n/a
plg	PM	LAKt24	plg8c	51.813		29.07		0.939	0.006	0.189	13.019	4.233	0.097			99.442	62.9573					n/a
plg	PM	LAKt24	plg10rtoMI	48.026		31.788		0.884	0.008	0.155	16.121	2.483	0.047			99.56	78.2031					n/a
plg	PM	LAKt24	plg10rtoMI	48.4		31.741		0.859	0.027	0.169	15.81	2.688	0.053			99.801	76.4719					n/a
plg	PM	LAKt24	plg10rtoMI	48.952		31.077		0.813	0.032	0.187	15.278	3.004	0.055			99.454	73.7566					n/a
plg	PM	LAKt24	plg10rtoMI	49.659		30.56		0.797	0.008	0.192	14.735	3.391	0.069			99.468	70.599					n/a
plg	PM	LAKt24	plg10rtoMI	49.021		31.103		0.772	0.005	0.187	15.219	3.056	0.054			99.457	73.3475					n/a
plg	PM	LAKt24	plg10rtoMI	48.335		31.334		0.804	0.025	0.195	15.587	2.795	0.064			99.181	75.5006					n/a
plg	PM	LAKt24	plg10rtoMI	48.335		31.285		0.784	0.001	0.173	15.569	2.832	0.059			99.068	75.235					n/a
plg	PM	LAKt24	plg10rtoMI	48.318		31.538		0.804	0	0.185	15.716	2.72	0.05			99.391	76.1502					n/a
plg	PM	LAKt24	plg10rtoMI	47.926		31.611		0.828	0.016	0.176	15.815	2.663	0.043			99.126	76.6453					n/a
plg	PM	LAKt24	plg10rtoMI	47.996		31.149		0.833	0.016	0.193	15.875	2.609	0.044			98.776	77.077					n/a
plg	PM	LAKt24	plg10MItoc	47.833		31.455		0.806	0.026	0.176	15.931	2.585	0.059			98.92	77.3017					n/a
plg	PM	LAKt24	plg10MItoc	47.722		31.437		0.832	0.015	0.18	15.653	2.767	0.05			98.702	75.764					n/a
plg	PM	LAKt24	plg10MItoc	47.749		31.317		0.82	0	0.195	15.738	2.704	0.051			98.614	76.2825					n/a
plg	PM	LAKt25	plg1r	51.21		29.441		0.982	0.01	0.18	13.453	4.004	0.1			99.46	64.9944					n/a
plg	PM	LAKt25	plg1c	52.08		28.657		1.023	0.01	0.203	12.677	4.471	0.105			99.323	61.0416					n/a
plg	PM	LAKt25	plg2c	52.33		28.41		0.984	0.021	0.18	12.415	4.541	0.125			99.11	60.1722					n/a
plg	PM	LAKt25	plg2r	51.928		28.767		0.974	0.041	0.196	12.788	4.356	0.105			99.245	61.8654					n/a
plg	PM	LAKt25	plg5r	50.909		28.638		0.944	0.034	0.181	13.287	4.073	0.084			98.215	64.3203					n/a
plg	PM	LAKt25	plg5c	51.179		28.294		0.986	0.017	0.208	12.821	4.363	0.113			98.072	61.8883					n/a
phase	mount	sample	no.	SiO2	TiO2	Al2O3	Cr2O3	FeO	MnO	MgO	CaO	Na2O	K2O	P2O5	NiO	Total	Mg# (Fe2+)	Mg# xtal av	Mg# core	Mg# rim	µm from core	type
cpx	TS	LAK01	cpx2r	49.086	1.775	2.792	0.041	13.374	0.338	14.156	17.831	0.281			0.031	99.705	65.3635	72.7181	73.4526	65.3635		c
cpx	TS	LAK01	cpx2	50.749	1.007	2.003	0.063	10.742	0.278	15.84	18.568	0.251			0.027	99.527	72.4443					c
cpx	TS	LAK01	cpx2	50.013	1.123	3.035	0.096	9.807	0.238	15.8	18.932	0.28			0.011	99.334	74.1761					c
cpx	TS	LAK01	cpx2	51.069	0.826	2.345	0.095	9.69	0.269	16.911	18.182	0.268			0.028	99.683	75.6779					c																								phase	mount	sample	no.
cpx	TS	LAK01	cpx2	49.408	1.505	4.537	0.037	11.607	0.271	14.49	17.378	0.358			0.038	99.63	68.9991					c																								cpx	TS	LAK01	cpx2r
cpx	TS	LAK01	cpx2	48.984	1.445	4.062	0.073	10.177	0.271	15.295	18.822	0.312			0.022	99.461	72.8223					c																								cpx	TS	LAK01	cpx2
cpx	TS	LAK01	cpx2	50.098	1.056	3.426	0.199	8.904	0.239	15.891	19.545	0.299			0.026	99.683	76.0875					c																								cpx	TS	LAK01	cpx2
cpx	TS	LAK01	cpx2	48.695	1.653	4.316	0.098	10.628	0.28	15.384	18.213	0.322			0.026	99.615	72.0726					c																								cpx	TS	LAK01	cpx2
cpx	TS	LAK01	cpx2	49.059	1.444	4.117	0.17	10.043	0.275	15.821	18.229	0.321			0.022	99.5	73.7437					c																								cpx	TS	LAK01	cpx2
cpx	TS	LAK01	cpx2	50.622	1.043	2.916	0.148	9.986	0.249	16.801	17.984	0.258			0.033	100.04	74.9976					c																								cpx	TS	LAK01	cpx2
cpx	TS	LAK01	cpx2	48.816	1.517	4.118	0.112	10.955	0.277	15.983	17.257	0.31			0.016	99.362	72.2312					c																								cpx	TS	LAK01	cpx2
cpx	TS	LAK01	cpx2	49.198	1.327	3.789	0.145	10.521	0.277	16.173	17.743	0.299			0.012	99.485	73.2668					c																								cpx	TS	LAK01	cpx2
cpx	TS	LAK01	cpx2c	49.124	1.408	3.81	0.134	10.087	0.249	15.654	18.486	0.285			0.026	99.263	73.4526					c																								cpx	TS	LAK01	cpx2
cpx	TS	LAK01	cpx1r	50.271	1.311	2.796	0.099	11.261	0.29	15.617	17.97	0.273			0.007	99.894	71.2026	76.4006	77.4936	71.2026	228	l																								cpx	TS	LAK01	cpx2
cpx	TS	LAK01	cpx1	50.47	1.276	2.788	0.131	10.199	0.258	15.653	18.746	0.271			0.034	99.826	73.2355				216	l																								cpx	TS	LAK01	cpx2
cpx	TS	LAK01	cpx1	49.965	1.168	3.53	0.102	9.546	0.233	15.594	19.294	0.353			0.017	99.803	74.4405				204	l																								cpx	TS	LAK01	cpx2
cpx	TS	LAK01	cpx1	50.154	1.102	3.468	0.122	9.004	0.236	15.71	19.705	0.331			0.028	99.859	75.6734				192	l																								cpx	TS	LAK01	cpx2c
cpx	TS	LAK01	cpx1	50.156	1.087	3.408	0.177	8.955	0.229	15.961	19.491	0.316			0.034	99.813	76.0635				180	l																								cpx	TS	LAK01	cpx1r
cpx	TS	LAK01	cpx1	50.065	1.17	3.544	0.199	8.767	0.221	15.903	19.77	0.33			0.027	99.995	76.3821				168	l																								cpx	TS	LAK01	cpx1
cpx	TS	LAK01	cpx1	49.942	1.189	3.547	0.267	8.684	0.216	15.796	19.885	0.334			0.037	99.898	76.4319				156	l																								cpx	TS	LAK01	cpx1
cpx	TS	LAK01	cpx1	49.693	1.299	3.794	0.301	8.96	0.227	15.807	19.575	0.315			0.042	100.011	75.8763				144	l																								cpx	TS	LAK01	cpx1
cpx	TS	LAK01	cpx1	49.698	1.258	3.698	0.35	8.743	0.217	15.774	19.863	0.286			0.032	99.918	76.2845				132	l																								cpx	TS	LAK01	cpx1
cpx	TS	LAK01	cpx1	49.869	1.2	3.545	0.379	8.513	0.191	15.858	20.047	0.298			0.008	99.909	76.858				120	l																								cpx	TS	LAK01	cpx1
cpx	TS	LAK01	cpx1	50.459	1.06	3.188	0.308	8.119	0.211	15.877	20.55	0.303			0.019	100.095	77.7108				108	l																								cpx	TS	LAK01	cpx1
cpx	TS	LAK01	cpx1	50.517	1.028	3.101	0.355	7.965	0.199	15.848	20.804	0.303			0.056	100.178	78.0094				96	l																								cpx	TS	LAK01	cpx1
cpx	TS	LAK01	cpx1	50.497	1.014	3.152	0.35	7.844	0.219	15.679	20.901	0.297			0.024	99.978	78.088				84	l																								cpx	TS	LAK01	cpx1
cpx	TS	LAK01	cpx1	50.355	1.018	3.173	0.333	8.022	0.21	15.899	20.611	0.315			0.033	99.968	77.9421				72	l																								cpx	TS	LAK01	cpx1
cpx	TS	LAK01	cpx1	50.348	1.058	3.327	0.353	8.263	0.214	16.055	19.932	0.29			0.015	99.856	77.5992				60	l																								cpx	TS	LAK01	cpx1
cpx	TS	LAK01	cpx1	50.484	1.057	3.263	0.333	8.087	0.2	15.724	20.708	0.284			0.036	100.177	77.6113				36	l																								cpx	TS	LAK01	cpx1
cpx	TS	LAK01	cpx1	50.323	1.112	3.337	0.332	8.222	0.216	15.833	20.298	0.293			0.022	99.988	77.4433				24	l																								cpx	TS	LAK01	cpx1
cpx	TS	LAK01	cpx1	50.323	1.039	3.184	0.311	8.337	0.234	15.893	20.013	0.288			0.026	99.649	77.2662				12	l																								cpx	TS	LAK01	cpx1
cpx	TS	LAK01	cpx1c	50.248	1.055	3.181	0.341	8.145	0.2	15.73	20.115	0.293			0.027	99.336	77.4936				0	l																								cpx	TS	LAK01	cpx1
cpx	TS	LAK01	cpx3r	51.623	0.707	1.76	0.07	10.146	0.289	17.424	17.342	0.26			0.027	99.648	75.3803	76.8435	78.3067	75.3803		l																								cpx	TS	LAK01	cpx1
cpx	TS	LAK01	cpx3c	50.784	0.811	2.433	0.184	7.991	0.218	16.179	20.42	0.276			0.029	99.324	78.3067					l																								cpx	TS	LAK01	cpx1
cpx	TS	LAK01	cpx4r	51.021	0.781	2.229	0.061	9.521	0.257	16.829	18.253	0.277			0.027	99.256	75.9115	75.2044	74.4973	75.9115		l																								cpx	TS	LAK01	cpx1
cpx	TS	LAK01	cpx4c	51.231	0.786	2.18	0.059	10.206	0.299	16.722	17.96	0.281			0.02	99.743	74.4973					l																								cpx	TS	LAK01	cpx1c
cpx	TS	LAK04	cpx2r	49.99	1.111	3.542	0.142	9.028	0.228	15.463	19.467	0.316			0.013	99.3	75.3311	79.311	81.0172	75.3311		c																								cpx	TS	LAK01	cpx3r
cpx	TS	LAK04	cpx2	50.789	0.891	2.934	0.357	7.687	0.198	15.957	20.283	0.281			0.023	99.4	78.7278					c																								cpx	TS	LAK01	cpx3c
cpx	TS	LAK04	cpx2	51.331	0.742	2.6	0.252	7.043	0.223	16.402	20.821	0.254			0.025	99.693	80.5902					c																								cpx	TS	LAK01	cpx4r
cpx	TS	LAK04	cpx2	51.625	0.748	2.624	0.258	6.913	0.161	16.411	20.913	0.245			0.048	99.945	80.8884					c																								cpx	TS	LAK01	cpx4c
cpx	TS	LAK04	cpx2c	51.611	0.723	2.512	0.28	6.891	0.173	16.496	20.865	0.259			0.033	99.842	81.0172					c																								cpx	TS	LAK04	cpx2r
cpx	TS	LAK04	cpx1rGM	52.101	0.649	1.637	0.076	11.181	0.321	18.684	14.545	0.172			0.029	99.395	74.8698	74.2971	73.7245	74.8698		c																								cpx	TS	LAK04	cpx2
cpx	TS	LAK04	cpx1cGM	52.724	0.543	1.259	0.075	12.629	0.334	19.875	11.88	0.149			0.021	99.49	73.7245					c																								cpx	TS	LAK04	cpx2
cpx	TS	LAK04	cpx3cGM	51.489	0.709	2.212	0.208	8.121	0.244	16.553	19.765	0.284			0.039	99.622	78.4205	78.4205	78.4205	78.4205		c																								cpx	TS	LAK04	cpx2
cpx	TS	LAK05	cpx3r	50.155	0.944	2.493	0.078	9.487	0.246	15.899	19.202	0.294			0.022	98.82	74.924	74.3125	73.7009	74.924		c																								cpx	TS	LAK04	cpx2c
cpx	TS	LAK05	cpx3c	49.383	1.369	3.79	0.156	9.819	0.227	15.434	18.76	0.307			0.03	99.274	73.7009					c																								cpx	TS	LAK04	cpx1rGM
cpx	TS	LAK05	cpx4r	49.255	1.226	2.778	0.118	10.22	0.231	15.111	19.151	0.286			0.026	98.402	72.4981	73.7224	72.5452	72.4981		l																								cpx	TS	LAK04	cpx1cGM
cpx	TS	LAK05	cpx4	50.052	1.1	3.638	0.199	8.751	0.214	15.186	19.995	0.324			0.037	99.496	75.5735					l																								cpx	TS	LAK04	cpx3cGM
cpx	TS	LAK05	cpx4	49.747	1.144	3.356	0.181	8.899	0.235	15.451	19.829	0.312			0.038	99.192	75.5832					l																								cpx	TS	LAK05	cpx3r
cpx	TS	LAK05	cpx4	49.054	1.402	3.873	0.162	9.6	0.233	15.057	19.211	0.315			0.045	98.952	73.6588					l																								cpx	TS	LAK05	cpx3c
cpx	TS	LAK05	cpx4	48.992	1.54	3.678	0.124	10.467	0.276	15.459	18.123	0.274			0.04	98.972	72.4759					l																								cpx	TS	LAK05	cpx4r
cpx	TS	LAK05	cpx4c	48.352	1.658	3.995	0.115	10.316	0.231	15.289	18.442	0.3			0.007	98.704	72.5452					l																								cpx	TS	LAK05	cpx4
cpx	TS	LAK05	cpx2rGM	51.458	0.86	1.818	0.075	10.868	0.286	16.25	17.732	0.251			0.021	99.617	72.7207	73.3024	73.8841	72.7207		c																								cpx	TS	LAK05	cpx4
cpx	TS	LAK05	cpx2cGM	51.829	0.815	1.802	0.08	10.097	0.254	16.022	18.651	0.243			0.028	99.82	73.8841					c																								cpx	TS	LAK05	cpx4
cpx	TS	LAK05	cpx1rGM	50.389	0.974	2.727	0.102	9.291	0.258	15.869	19.17	0.293			0.02	99.092	75.279	74.8247	74.3704	75.279		l																								cpx	TS	LAK05	cpx4
cpx	TS	LAK05	cpx1cGM	48.829	1.576	4.336	0.281	9.368	0.216	15.247	18.953	0.327			0.012	99.144	74.3704					l																								cpx	TS	LAK05	cpx4c
cpx	TS	LAK06	cpx1r	51.941	0.777	2.142	0.087	10.93	0.302	16.788	16.754	0.357			0.024	100.102	73.2508	76.6011	77.7407	73.2508	85.59	c																								cpx	TS	LAK05	cpx2rGM
cpx	TS	LAK06	cpx1	52.165	0.697	1.848	0.107	9.249	0.273	17.313	18.039	0.252			0.015	99.957	76.9443				76.08	c																								cpx	TS	LAK05	cpx2cGM
cpx	TS	LAK06	cpx1	50.754	1.011	3.041	0.108	10.732	0.257	16.872	16.754	0.289			0.032	99.85	73.7043				66.57	c																								cpx	TS	LAK05	cpx1rGM
cpx	TS	LAK06	cpx1	50.245	1.168	3.419	0.236	8.728	0.241	15.781	19.612	0.313			0.025	99.768	76.3235				57.06	c																								cpx	TS	LAK05	cpx1cGM
cpx	TS	LAK06	cpx1	50.464	1.065	3.352	0.253	8.604	0.218	15.848	19.708	0.296			0.035	99.841	76.657				47.55	c																								cpx	TS	LAK06	cpx1r
cpx	TS	LAK06	cpx1	50.284	1.14	3.556	0.306	8.495	0.171	15.695	19.874	0.323			0.027	99.873	76.7115				38.04	c																								cpx	TS	LAK06	cpx1
cpx	TS	LAK06	cpx1	50.665	1.075	3.317	0.378	8.325	0.22	15.82	19.967	0.296			0.009	100.073	77.2106				28.53	c																								cpx	TS	LAK06	cpx1
cpx	TS	LAK06	cpx1	51.397	0.827	2.622	0.304	7.838	0.204	16.192	20.218	0.287			0.034	99.921	78.6468				19.02	c																								cpx	TS	LAK06	cpx1
cpx	TS	LAK06	cpx1	51.134	0.855	2.711	0.336	7.774	0.183	16.228	20.433	0.285			0.029	99.968	78.8212				9.51	c																								cpx	TS	LAK06	cpx1
cpx	TS	LAK06	cpx1c	50.961	0.925	2.941	0.311	8.178	0.211	16.02	20.035	0.301			0.028	99.91	77.7407				0	c																								cpx	TS	LAK06	cpx1
cpx	TS	LAK06	cpx2r	51.407	0.999	1.92	0.078	10.311	0.256	15.385	19.135	0.251			0.034	99.775	72.6793	74.6247	72.8211	72.6793	90.3103	c																								cpx	TS	LAK06	cpx1
cpx	TS	LAK06	cpx2	50.271	1.25	2.964	0.137	10.308	0.254	15.258	18.591	0.278			0.047	99.359	72.5202				82.1003	c																								cpx	TS	LAK06	cpx1
cpx	TS	LAK06	cpx2	51.043	1.054	2.504	0.116	10.676	0.273	15.908	17.931	0.271			0.018	99.795	72.6523				73.8903	c																								cpx	TS	LAK06	cpx1
cpx	TS	LAK06	cpx2	51.439	0.853	2.405	0.109	9.463	0.253	16.092	18.898	0.266			0.05	99.829	75.1973				65.6803	c																								cpx	TS	LAK06	cpx1c
cpx	TS	LAK06	cpx2	50.209	1.054	3.649	0.158	9.059	0.221	15.311	19.474	0.337			0.044	99.517	75.083				57.4703	c
cpx	TS	LAK06	cpx2	50.514	1.053	3.447	0.172	8.956	0.222	15.451	19.601	0.333			0.021	99.77	75.4652				49.2603	c																								phase	mount	sample	no.
cpx	TS	LAK06	cpx2	50.442	1.11	3.234	0.182	8.92	0.213	15.407	19.751	0.304			0.006	99.568	75.487				41.0503	c																								cpx	TS	LAK06	cpx2r
cpx	TS	LAK06	cpx2	50.817	0.973	2.832	0.157	8.521	0.249	15.749	19.998	0.289			0.02	99.606	76.7183				32.8403	c																								cpx	TS	LAK06	cpx2
cpx	TS	LAK06	cpx2	50.503	1.054	3.281	0.169	8.715	0.226	15.548	19.566	0.314			0.008	99.383	76.0808				24.6303	c																								cpx	TS	LAK06	cpx2
cpx	TS	LAK06	cpx2	50.25	1.146	3.412	0.165	9.084	0.258	15.433	19.481	0.308			0.015	99.551	75.1798				16.42	c																								cpx	TS	LAK06	cpx2
cpx	TS	LAK06	cpx2	50.574	1.022	2.938	0.154	9.036	0.236	15.714	19.538	0.303			0.027	99.541	75.6128				8.211	c																								cpx	TS	LAK06	cpx2
cpx	TS	LAK06	cpx2c	49.223	1.326	3.826	0.1	9.974	0.243	14.989	19.168	0.343			0.014	99.205	72.8211				0	c																								cpx	TS	LAK06	cpx2
cpx	TS	LAK06	cpx4r	52.424	0.89	1.299	0.046	12.354	0.323	16.167	17.036	0.211			0.021	100.771	69.9984	74.4176	76.2552	69.9984	240.825	c																								cpx	TS	LAK06	cpx2
cpx	TS	LAK06	cpx4	52.249	0.77	1.828	0.058	9.959	0.258	17.085	17.806	0.241			0.027	100.282	75.3609				228.15	c																								cpx	TS	LAK06	cpx2
cpx	TS	LAK06	cpx4	51.017	1.047	3.008	0.044	9.78	0.231	15.522	19.259	0.346			0.014	100.269	73.8879				215.475	c																								cpx	TS	LAK06	cpx2
cpx	TS	LAK06	cpx4	49.992	1.162	3.336	0.075	9.57	0.241	15.425	19.371	0.352			0.006	99.529	74.1846				202.8	c																								cpx	TS	LAK06	cpx2
cpx	TS	LAK06	cpx4	50.356	1.096	3.136	0.125	8.996	0.242	15.316	19.723	0.298			0.022	99.31	75.2194				190.125	c																								cpx	TS	LAK06	cpx2
cpx	TS	LAK06	cpx4	50.219	1.182	3.501	0.14	9.196	0.198	15.463	19.487	0.321			0.038	99.745	74.9868				177.45	c																								cpx	TS	LAK06	cpx2c
cpx	TS	LAK06	cpx4	50.079	1.172	3.621	0.184	9.17	0.221	15.589	19.37	0.307			0.04	99.755	75.1916				164.775	c																								cpx	TS	LAK06	cpx4r
cpx	TS	LAK06	cpx4	49.766	1.384	3.796	0.264	9.042	0.214	15.423	19.684	0.334			0	99.908	75.2541				152.1	c																								cpx	TS	LAK06	cpx4
cpx	TS	LAK06	cpx4	51.749	0.783	2.033	0.213	8.766	0.269	17.253	18.563	0.225			0.033	99.886	77.8222				139.425	c																								cpx	TS	LAK06	cpx4
cpx	TS	LAK06	cpx4	50.144	1.318	3.339	0.229	9.286	0.224	15.34	19.752	0.279			0.008	99.917	74.6529				126.75	c																								cpx	TS	LAK06	cpx4
cpx	TS	LAK06	cpx4	49.239	1.615	3.946	0.189	9.828	0.24	15.13	19.107	0.316			0.023	99.634	73.2956				114.075	c																								cpx	TS	LAK06	cpx4
cpx	TS	LAK06	cpx4	49.247	1.44	3.852	0.207	10.061	0.256	15.655	18.259	0.296			0.023	99.296	73.5041				101.4	c																								cpx	TS	LAK06	cpx4
cpx	TS	LAK06	cpx4	50.437	1.291	3.251	0.231	10.995	0.291	17.489	16.043	0.252			0.026	100.306	73.9305				88.725	c																								cpx	TS	LAK06	cpx4
cpx	TS	LAK06	cpx4	49.066	1.533	3.954	0.199	9.795	0.242	15.257	18.849	0.331			0.015	99.239	73.5244				76.05	c																								cpx	TS	LAK06	cpx4
cpx	TS	LAK06	cpx4	48.795	1.73	4.228	0.197	9.974	0.246	14.888	19.097	0.321			0.018	99.494	72.6871				63.375	c																								cpx	TS	LAK06	cpx4
cpx	TS	LAK06	cpx4	49.585	1.364	3.477	0.25	9.472	0.227	15.494	19.067	0.298			0.044	99.278	74.4662				50.7	c																								cpx	TS	LAK06	cpx4
cpx	TS	LAK06	cpx4	49.053	1.532	3.729	0.261	8.947	0.219	14.82	20.304	0.297			0.013	99.175	74.704				38.025	c																								cpx	TS	LAK06	cpx4
cpx	TS	LAK06	cpx4	49.483	1.459	3.742	0.201	9.422	0.246	15.069	19.498	0.305			0.03	99.454	74.0356				25.35	c																								cpx	TS	LAK06	cpx4
cpx	TS	LAK06	cpx4	49.95	1.223	3.334	0.233	8.986	0.229	15.441	19.646	0.301			0.03	99.374	75.3912				12.675	c																								cpx	TS	LAK06	cpx4
cpx	TS	LAK06	cpx4c	49.924	1.222	3.652	0.317	8.635	0.221	15.554	19.748	0.312			0.021	99.605	76.2552				0	c																								cpx	TS	LAK06	cpx4
cpx	TS	LAK06	cpx3r	51.065	1.174	2.617	0.123	10.704	0.278	15.872	17.55	0.245			0.032	99.658	72.5551	74.9971	76.0672	72.5551	139.27	l																								cpx	TS	LAK06	cpx4
cpx	TS	LAK06	cpx3	50.733	1.224	2.752	0.134	11.228	0.317	16.281	17.097	0.344			0.023	100.133	72.1078				131.94	l																								cpx	TS	LAK06	cpx4
cpx	TS	LAK06	cpx3	49.937	1.228	3.362	0.08	10.903	0.293	16.327	17.042	0.302			0.044	99.518	72.7507				124.61	l																								cpx	TS	LAK06	cpx4
cpx	TS	LAK06	cpx3	49.769	1.34	3.86	0.109	10.678	0.268	15.811	17.253	0.319			0.032	99.439	72.5269				117.28	l																								cpx	TS	LAK06	cpx4
cpx	TS	LAK06	cpx3	50.937	0.947	2.807	0.112	9.652	0.261	16.458	18.161	0.29			0.044	99.667	75.2479				109.95	l																								cpx	TS	LAK06	cpx4
cpx	TS	LAK06	cpx3	50.11	1.15	3.532	0.174	9.946	0.267	16.115	17.922	0.324			0.04	99.58	74.2845				102.62	l																								cpx	TS	LAK06	cpx4c
cpx	TS	LAK06	cpx3	51.928	0.738	1.869	0.139	8.657	0.254	16.82	19.079	0.257			0.035	99.778	77.5987				95.2903	l																								cpx	TS	LAK06	cpx3r
cpx	TS	LAK06	cpx3	51.265	1.008	2.764	0.14	9.45	0.275	16.374	18.269	0.275			0.017	99.837	75.5453				87.9603	l																								cpx	TS	LAK06	cpx3
cpx	TS	LAK06	cpx3	50.945	0.972	2.804	0.169	9.427	0.269	16.384	18.35	0.282			0.043	99.646	75.6015				80.6303	l																								cpx	TS	LAK06	cpx3
cpx	TS	LAK06	cpx3	50.803	0.927	2.736	0.156	9.307	0.229	16.416	18.632	0.28			0.028	99.515	75.8728				73.3003	l																								cpx	TS	LAK06	cpx3
cpx	TS	LAK06	cpx3	50.488	1.104	3.085	0.138	9.806	0.25	16.318	18.199	0.265			0.026	99.679	74.7911				65.9703	l																								cpx	TS	LAK06	cpx3
cpx	TS	LAK06	cpx3	52.273	0.638	1.716	0.133	9.575	0.287	17.859	17.269	0.23			0.021	100.002	76.8806				58.6403	l																								cpx	TS	LAK06	cpx3
cpx	TS	LAK06	cpx3	51.498	0.773	2.166	0.16	9.111	0.237	16.81	18.632	0.236			0.046	99.669	76.687				51.3103	l																								cpx	TS	LAK06	cpx3
cpx	TS	LAK06	cpx3	52.031	0.674	1.806	0.158	9.071	0.282	17.202	18.439	0.239			0.023	99.925	77.1742				43.9803	l																								cpx	TS	LAK06	cpx3
cpx	TS	LAK06	cpx3	50.347	1.057	3.355	0.316	9.672	0.277	16.301	18.02	0.283			0.021	99.649	75.0301				36.6503	l																								cpx	TS	LAK06	cpx3
cpx	TS	LAK06	cpx3	51.098	0.953	2.179	0.168	10.497	0.274	16.253	17.849	0.248			0.013	99.532	73.4079				29.3203	l																								cpx	TS	LAK06	cpx3
cpx	TS	LAK06	cpx3	52.505	0.578	1.609	0.106	11.849	0.33	19.751	13.33	0.168			0.021	100.248	74.8229				21.9903	l																								cpx	TS	LAK06	cpx3
cpx	TS	LAK06	cpx3	52.644	0.594	1.535	0.099	11.036	0.313	19.21	14.405	0.195			0.017	100.048	75.63				14.66	l																								cpx	TS	LAK06	cpx3
cpx	TS	LAK06	cpx3	52.333	0.633	1.542	0.123	10.91	0.336	18.715	15.162	0.196			0.037	99.985	75.3594				7.331	l																								cpx	TS	LAK06	cpx3
cpx	TS	LAK06	cpx3c	51.574	0.743	1.839	0.203	9.651	0.256	17.205	17.685	0.218			0.03	99.403	76.0672				0	l																								cpx	TS	LAK06	cpx3
cpx	TS	LAK06	cpx5r	50.36	1.14	3.303	0.136	9.153	0.228	15.664	19.196	0.297			0.027	99.505	75.3155	77.6936	78.76	75.3155	149.849	l																								cpx	TS	LAK06	cpx3
cpx	TS	LAK06	cpx5	50.23	1.083	3.206	0.102	8.98	0.215	15.709	19.289	0.294			0.02	99.129	75.7214				133.199	l																								cpx	TS	LAK06	cpx3
cpx	TS	LAK06	cpx5	50.211	1.088	3.32	0.119	8.837	0.243	15.583	19.407	0.303			0.026	99.136	75.8681				116.549	l																								cpx	TS	LAK06	cpx3
cpx	TS	LAK06	cpx5	50.529	1.032	3.141	0.246	8.352	0.223	15.767	19.719	0.281			0.027	99.317	77.0944				99.8993	l																								cpx	TS	LAK06	cpx3
cpx	TS	LAK06	cpx5	51.183	0.848	2.627	0.301	7.744	0.185	16.076	20.181	0.276			0.034	99.455	78.7285				83.2493	l																								cpx	TS	LAK06	cpx3
cpx	TS	LAK06	cpx5	51.148	0.824	2.517	0.312	7.651	0.191	16.143	20.116	0.286			0.003	99.193	78.9992				66.5993	l																								cpx	TS	LAK06	cpx3c
cpx	TS	LAK06	cpx5	51.259	0.804	2.483	0.225	7.745	0.2	16.155	20.106	0.285			0.058	99.319	78.8083				49.9493	l																								cpx	TS	LAK06	cpx5r
cpx	TS	LAK06	cpx5	51.389	0.77	2.398	0.21	7.719	0.206	16.061	19.661	0.28			0.045	98.738	78.767				33.3	l																								cpx	TS	LAK06	cpx5
cpx	TS	LAK06	cpx5	51.684	0.78	2.325	0.187	7.781	0.217	16.294	20.087	0.276			0.064	99.694	78.8739				16.648	l																								cpx	TS	LAK06	cpx5
cpx	TS	LAK06	cpx5c	51.416	0.792	2.315	0.229	7.803	0.209	16.229	19.899	0.272			0.04	99.205	78.76				0	l																								cpx	TS	LAK06	cpx5
cpx	TS	LAK11	cpx1r	51.466	0.745	1.892	0.082	9.345	0.244	16.724	18.871	0.267			0.032	99.668	76.1375	75.1933	72.6423	76.1375		c																								cpx	TS	LAK06	cpx5
cpx	TS	LAK11	cpx1	51.582	0.683	1.701	0.13	9.648	0.298	17.914	17.054	0.248			0.03	99.289	76.8002					c																								cpx	TS	LAK06	cpx5
cpx	TS	LAK11	cpx1c	49.208	1.36	3.635	0.113	10.627	0.283	15.827	17.553	0.311			0.024	98.94	72.6423					c																								cpx	TS	LAK06	cpx5
cpx	TS	LAK11	cpx3r	50.087	1.07	3.087	0.172	8.876	0.232	15.723	19.601	0.315			0.017	99.179	75.9511	74.5051	73.0591	75.9511		c																								cpx	TS	LAK06	cpx5
cpx	TS	LAK11	cpx3c	49.502	1.266	3.363	0.114	10.268	0.257	15.618	18.626	0.316			0.02	99.349	73.0591					c																								cpx	TS	LAK06	cpx5
cpx	TS	LAK11	cpx4r	49.369	1.258	3.65	0.098	9.606	0.25	15.267	19.096	0.314			0.022	98.931	73.9146	73.5735	73.2325	73.9146		c																								cpx	TS	LAK06	cpx5c
cpx	TS	LAK11	cpx4c	49.013	1.282	3.865	0.265	10.254	0.27	15.735	17.854	0.316			0.006	98.861	73.2325					c																								cpx	TS	LAK11	cpx1r
cpx	TS	LAK11	cpx5r	51.735	0.694	1.698	0.17	8.939	0.255	17.56	18.235	0.227			0.021	99.537	77.7893	77.9904	78.1915	77.7893		c																								cpx	TS	LAK11	cpx1
cpx	TS	LAK11	cpx5c	50.556	0.91	2.868	0.304	8.088	0.225	16.265	20.086	0.284			0.027	99.612	78.1915					c																								cpx	TS	LAK11	cpx1c
cpx	TS	LAK11	cpx2r	50.239	1.116	3.427	0.186	8.896	0.229	15.65	19.704	0.327			0.02	99.793	75.8248	78.6349	78.2975	75.8248		l																								cpx	TS	LAK11	cpx3r
cpx	TS	LAK11	cpx2	50.589	0.859	3.231	0.523	7.114	0.18	16.191	20.574	0.286			0.025	99.572	80.2282					l																								cpx	TS	LAK11	cpx3c
cpx	TS	LAK11	cpx2	50.009	1.018	3.622	0.388	7.472	0.165	16.107	20.046	0.264			0.027	99.119	79.3527					l																								cpx	TS	LAK11	cpx4r
cpx	TS	LAK11	cpx2	49.513	0.976	3.582	0.409	7.542	0.177	16.376	19.614	0.301			0.027	98.517	79.4711					l																								cpx	TS	LAK11	cpx4c
cpx	TS	LAK11	cpx2c	50.064	0.994	3.58	0.416	8.022	0.231	16.233	19.604	0.387			0.017	99.547	78.2975					l																								cpx	TS	LAK11	cpx5r
cpx	TS	LAK12	cpx1r	50.259	1.177	1.832	0.058	13.192	0.317	15.01	16.51	0.193			0.006	98.555	66.9812	78.1139	77.5576	66.9812	1948.24	c																								cpx	TS	LAK11	cpx5c
cpx	TS	LAK12	cpx1	50.625	0.976	2.751	0.035	10.252	0.256	15.582	18.347	0.34			0.024	99.187	73.0443				1908.48	c																								cpx	TS	LAK11	cpx2r
cpx	TS	LAK12	cpx1	51.197	0.797	2.043	0.069	9.312	0.251	16.28	18.667	0.281			0.047	98.944	75.7103				1868.72	c																								cpx	TS	LAK11	cpx2
cpx	TS	LAK12	cpx1	51.368	0.824	1.93	0.074	9.409	0.271	16.294	18.623	0.26			0.009	99.063	75.5351				1828.96	c																								cpx	TS	LAK11	cpx2
cpx	TS	LAK12	cpx1	51.547	0.816	1.822	0.119	8.819	0.254	16.718	18.738	0.225			0.013	99.071	77.1677				1749.44	c																								cpx	TS	LAK11	cpx2
cpx	TS	LAK12	cpx1	51.419	0.772	2.175	0.188	7.736	0.196	16.176	20.172	0.268			0.047	99.15	78.8494				1709.68	c																								cpx	TS	LAK11	cpx2c
cpx	TS	LAK12	cpx1	51.44	0.783	2.206	0.207	7.743	0.215	16.141	20.111	0.251			0.024	99.12	78.7982				1669.92	c
cpx	TS	LAK12	cpx1	51.501	0.772	2.201	0.206	7.707	0.216	16.206	20.199	0.268			0.041	99.316	78.9428				1630.16	c																								phase	mount	sample	no.
cpx	TS	LAK12	cpx1	51.515	0.788	2.178	0.201	7.744	0.205	16.203	20.184	0.278			0.052	99.35	78.86				1590.4	c																								cpx	TS	LAK12	cpx1r
cpx	TS	LAK12	cpx1	51.477	0.76	2.146	0.22	7.772	0.188	16.257	20.2	0.273			0.029	99.322	78.8553				1550.64	c																								cpx	TS	LAK12	cpx1
cpx	TS	LAK12	cpx1	51.526	0.78	2.148	0.209	7.74	0.219	16.266	20.206	0.278			0.036	99.408	78.9332				1510.88	c																								cpx	TS	LAK12	cpx1
cpx	TS	LAK12	cpx1	51.378	0.773	2.174	0.22	7.673	0.21	16.219	20.235	0.264			0.043	99.188	79.0295				1471.12	c																								cpx	TS	LAK12	cpx1
cpx	TS	LAK12	cpx1	51.728	0.788	2.226	0.215	7.677	0.216	16.165	20.172	0.26			0.014	99.461	78.9655				1431.36	c																								cpx	TS	LAK12	cpx1
cpx	TS	LAK12	cpx1	51.666	0.768	2.198	0.196	7.66	0.209	16.225	20.238	0.262			0.038	99.461	79.0637				1391.6	c																								cpx	TS	LAK12	cpx1
cpx	TS	LAK12	cpx1	51.749	0.753	2.137	0.226	7.707	0.231	16.224	20.248	0.274			0.036	99.584	78.9613				1351.84	c																								cpx	TS	LAK12	cpx1
cpx	TS	LAK12	cpx1	52.15	0.762	2.197	0.221	7.682	0.216	16.254	20.165	0.257			0.033	99.938	79.0458				1312.08	c																								cpx	TS	LAK12	cpx1
cpx	TS	LAK12	cpx1	51.71	0.755	2.182	0.221	7.619	0.219	16.191	20.264	0.26			0.027	99.448	79.1178				1272.32	c																								cpx	TS	LAK12	cpx1
cpx	TS	LAK12	cpx1	51.778	0.746	2.171	0.222	7.573	0.194	16.241	20.135	0.263			0.01	99.333	79.2684				1232.56	c																								cpx	TS	LAK12	cpx1
cpx	TS	LAK12	cpx1	51.835	0.727	2.097	0.212	7.633	0.208	16.289	20.176	0.285			0.044	99.508	79.1871				1192.8	c																								cpx	TS	LAK12	cpx1
cpx	TS	LAK12	cpx1	51.893	0.735	2.075	0.215	7.681	0.177	16.325	20.166	0.29			0.025	99.581	79.1201				1153.04	c																								cpx	TS	LAK12	cpx1
cpx	TS	LAK12	cpx1	51.708	0.736	2.092	0.201	7.682	0.214	16.342	20.152	0.276			0.024	99.428	79.1351				1113.28	c																								cpx	TS	LAK12	cpx1
cpx	TS	LAK12	cpx1	51.743	0.732	2.057	0.227	7.588	0.21	16.331	20.133	0.261			0.033	99.314	79.3266				1073.52	c																								cpx	TS	LAK12	cpx1
cpx	TS	LAK12	cpx1	51.824	0.73	2.042	0.225	7.616	0.214	16.402	20.1	0.267			0.011	99.43	79.3373				1033.76	c																								cpx	TS	LAK12	cpx1
cpx	TS	LAK12	cpx1	51.777	0.716	2.051	0.214	7.602	0.201	16.339	20.125	0.246			0.03	99.3	79.3044				994	c																								cpx	TS	LAK12	cpx1
cpx	TS	LAK12	cpx1	50.824	0.941	2.834	0.281	7.99	0.23	15.844	20.019	0.28			0.008	99.252	77.9513				954.24	c																								cpx	TS	LAK12	cpx1
cpx	TS	LAK12	cpx1	51.752	0.799	2.25	0.24	7.868	0.196	16.242	19.973	0.282			0.029	99.63	78.6344				874.72	c																								cpx	TS	LAK12	cpx1
cpx	TS	LAK12	cpx1	51.512	0.793	2.256	0.219	7.771	0.205	16.219	20.072	0.264			0.033	99.344	78.8184				834.96	c																								cpx	TS	LAK12	cpx1
cpx	TS	LAK12	cpx1	52.197	0.801	2.335	0.232	7.703	0.179	16.089	20.122	0.275			0.016	99.948	78.8308				795.2	c																								cpx	TS	LAK12	cpx1
cpx	TS	LAK12	cpx1	51.564	0.774	2.294	0.257	7.727	0.215	16.16	20.094	0.268			0.008	99.361	78.8523				755.44	c																								cpx	TS	LAK12	cpx1
cpx	TS	LAK12	cpx1	51.898	0.76	2.104	0.219	7.838	0.212	16.314	20.016	0.235			0.02	99.616	78.7725				715.68	c																								cpx	TS	LAK12	cpx1
cpx	TS	LAK12	cpx1	51.762	0.746	2.155	0.24	7.545	0.203	16.28	20.225	0.272			0.025	99.454	79.3685				675.92	c																								cpx	TS	LAK12	cpx1
cpx	TS	LAK12	cpx1	51.861	0.729	2.092	0.23	7.635	0.18	16.29	20.184	0.278			0.026	99.506	79.1838				636.16	c																								cpx	TS	LAK12	cpx1
cpx	TS	LAK12	cpx1	51.861	0.74	2.045	0.223	7.654	0.207	16.339	20.203	0.259			0.017	99.548	79.1923				596.4	c																								cpx	TS	LAK12	cpx1
cpx	TS	LAK12	cpx1	51.893	0.72	2.042	0.228	7.622	0.214	16.422	20.154	0.26			0.008	99.563	79.3444				556.64	c																								cpx	TS	LAK12	cpx1
cpx	TS	LAK12	cpx1	52.286	0.922	2.965	0.282	7.849	0.194	16.295	19.806	0.301			0.036	100.937	78.7296				516.88	c																								cpx	TS	LAK12	cpx1
cpx	TS	LAK12	cpx1	51.144	0.89	2.792	0.319	7.758	0.211	15.915	20.205	0.277			0.012	99.522	78.529				477.12	c																								cpx	TS	LAK12	cpx1
cpx	TS	LAK12	cpx1	50.892	0.961	2.956	0.298	8.01	0.191	15.845	20.003	0.294			0.029	99.479	77.9094				437.36	c																								cpx	TS	LAK12	cpx1
cpx	TS	LAK12	cpx1	50.836	0.982	2.882	0.298	8.173	0.224	16.02	19.652	0.294			0.019	99.381	77.7513				397.6	c																								cpx	TS	LAK12	cpx1
cpx	TS	LAK12	cpx1	50.876	0.977	2.934	0.312	8.154	0.219	15.958	19.64	0.291			0.016	99.378	77.7245				357.84	c																								cpx	TS	LAK12	cpx1
cpx	TS	LAK12	cpx1	50.737	0.967	2.982	0.321	8.091	0.232	15.832	19.459	0.291			0.021	98.932	77.7215				318.08	c																								cpx	TS	LAK12	cpx1
cpx	TS	LAK12	cpx1	50.69	0.957	2.915	0.281	8.203	0.236	15.954	19.618	0.289			0.022	99.166	77.6162				278.32	c																								cpx	TS	LAK12	cpx1
cpx	TS	LAK12	cpx1	50.986	0.963	2.963	0.31	8.228	0.219	15.959	19.703	0.28			0.03	99.642	77.5687				238.56	c																								cpx	TS	LAK12	cpx1
cpx	TS	LAK12	cpx1	50.919	0.962	2.934	0.28	8.198	0.218	16.013	19.759	0.306			0.028	99.616	77.6908				198.8	c																								cpx	TS	LAK12	cpx1
cpx	TS	LAK12	cpx1	50.954	0.972	2.935	0.307	8.08	0.226	15.964	19.701	0.282			0.022	99.442	77.8884				159.04	c																								cpx	TS	LAK12	cpx1
cpx	TS	LAK12	cpx1	51.055	0.958	2.969	0.275	8.223	0.224	15.962	19.77	0.285			0.013	99.733	77.5826				119.28	c																								cpx	TS	LAK12	cpx1
cpx	TS	LAK12	cpx1	50.957	0.972	2.896	0.294	8.076	0.222	15.967	19.793	0.269			0.007	99.454	77.9001				79.52	c																								cpx	TS	LAK12	cpx1
cpx	TS	LAK12	cpx1	51.089	0.98	2.894	0.284	8.101	0.218	15.933	19.826	0.287			0.028	99.641	77.8101				39.76	c																								cpx	TS	LAK12	cpx1
cpx	TS	LAK12	cpx1c	51.066	0.973	2.946	0.29	8.225	0.201	15.943	19.799	0.265			0.011	99.718	77.5576				0	c																								cpx	TS	LAK12	cpx1
cpx	TS	LAK12	cpx3r	51.536	0.757	2.04	0.035	10.01	0.296	16.365	17.878	0.281			0.024	99.221	74.4557	74.2617	73.2167	74.4557	223.286	c																								cpx	TS	LAK12	cpx1
cpx	TS	LAK12	cpx3	51.802	0.735	2.152	0.125	8.971	0.246	16.536	18.751	0.287			0.031	99.636	76.67				207.337	c																								cpx	TS	LAK12	cpx1
cpx	TS	LAK12	cpx3	52.131	0.72	1.821	0.068	10.262	0.292	17.472	16.672	0.247			0.014	99.699	75.22				191.388	c																								cpx	TS	LAK12	cpx1
cpx	TS	LAK12	cpx3	52.145	0.707	1.927	0.137	8.773	0.249	16.836	18.734	0.277			0.045	99.83	77.3831				175.439	c																								cpx	TS	LAK12	cpx1
cpx	TS	LAK12	cpx3	52.028	0.65	1.691	0.072	10.458	0.298	17.743	16.237	0.22			0.009	99.406	75.1542				159.49	c																								cpx	TS	LAK12	cpx1
cpx	TS	LAK12	cpx3	52.381	0.666	1.568	0.081	10.473	0.306	17.897	16.034	0.19			0.032	99.628	75.2886				143.541	c																								cpx	TS	LAK12	cpx1
cpx	TS	LAK12	cpx3	49.394	1.439	3.708	0.101	9.913	0.255	15.151	18.711	0.349			0.016	99.038	73.154				127.592	c																								cpx	TS	LAK12	cpx1
cpx	TS	LAK12	cpx3	49.958	1.25	3.476	0.119	9.967	0.264	15.519	18.386	0.305			0.012	99.255	73.517				111.643	c																								cpx	TS	LAK12	cpx1c
cpx	TS	LAK12	cpx3	49.991	1.217	3.379	0.111	10.204	0.253	15.684	18.15	0.297			0.038	99.325	73.2646				95.694	c																								cpx	TS	LAK12	cpx3r
cpx	TS	LAK12	cpx3	49.608	1.248	3.551	0.117	9.996	0.252	15.466	18.37	0.323			0.023	98.953	73.3937				79.745	c																								cpx	TS	LAK12	cpx3
cpx	TS	LAK12	cpx3	49.446	1.345	3.636	0.122	9.757	0.235	15.124	18.819	0.298			0.023	98.804	73.4296				63.796	c																								cpx	TS	LAK12	cpx3
cpx	TS	LAK12	cpx3	49.335	1.335	3.573	0.11	9.729	0.229	15.116	18.842	0.335			0.025	98.629	73.4753				47.847	c																								cpx	TS	LAK12	cpx3
cpx	TS	LAK12	cpx3	49.357	1.295	3.724	0.139	9.843	0.236	15.117	18.829	0.322			0.041	98.904	73.2489				31.898	c																								cpx	TS	LAK12	cpx3
cpx	TS	LAK12	cpx3	48.937	1.448	4.046	0.127	9.779	0.261	14.87	19.052	0.324			0.003	98.847	73.0535				15.949	c																								cpx	TS	LAK12	cpx3
cpx	TS	LAK12	cpx3c	49.053	1.25	3.9	0.123	9.987	0.23	15.313	18.256	0.34			0.029	98.481	73.2167				0	c																								cpx	TS	LAK12	cpx3
cpx	TS	LAK12	cpx2r	51.854	0.732	2.168	0.064	9.176	0.259	16.506	18.495	0.282			0.031	99.565	76.2306	76.031	75.2797	76.2306	216.588	l																								cpx	TS	LAK12	cpx3
cpx	TS	LAK12	cpx2	51.606	0.796	2.286	0.179	8.696	0.255	16.534	18.779	0.277			0.047	99.454	77.2202				198.539	l																								cpx	TS	LAK12	cpx3
cpx	TS	LAK12	cpx2	51.503	0.804	2.185	0.181	9.551	0.259	17.006	17.549	0.241			0.033	99.313	76.045				162.441	l																								cpx	TS	LAK12	cpx3
cpx	TS	LAK12	cpx2	52.116	0.638	1.745	0.146	9.859	0.291	18.094	16.28	0.23			0.012	99.413	76.5922				144.392	l																								cpx	TS	LAK12	cpx3
cpx	TS	LAK12	cpx2	51.865	0.758	1.923	0.117	9.206	0.275	16.618	18.635	0.266			0.02	99.683	76.2939				126.343	l																								cpx	TS	LAK12	cpx3
cpx	TS	LAK12	cpx2	50.958	0.988	2.79	0.15	9.062	0.246	15.91	19.317	0.288			0.026	99.736	75.7879				108.294	l																								cpx	TS	LAK12	cpx3
cpx	TS	LAK12	cpx2	52.593	0.65	1.594	0.105	11.478	0.352	19.108	13.813	0.213			0.007	99.913	74.7987				36.098	l																								cpx	TS	LAK12	cpx3
cpx	TS	LAK12	cpx2c	51.135	1.063	2.768	0.124	9.334	0.247	15.943	18.837	0.262			0.035	99.748	75.2797				0	l																								cpx	TS	LAK12	cpx3c
cpx	TS	LAK12	cpx2GM	50.109	1.336	3.483	0.119	10.059	0.25	15.65	18.287	0.302			0.03	99.625	73.5018	73.8878	74.4728	73.5018	90.245	l																								cpx	TS	LAK12	cpx2r
cpx	TS	LAK12	cpx2GM	50.639	1.077	2.947	0.148	9.132	0.228	15.569	19.4	0.286			0.034	99.459	75.2451				72.196	l																								cpx	TS	LAK12	cpx2
cpx	TS	LAK12	cpx2GM	49.406	1.525	3.966	0.16	10.152	0.246	15.205	18.353	0.312			0	99.326	72.7541				54.147	l																								cpx	TS	LAK12	cpx2
cpx	TS	LAK20	cpx1r	50.303	1.246	3.411	0.087	10.471	0.264	16.174	17.594	0.298			0.03	99.877	73.3612	74.4968	76.1617	73.3612		c																								cpx	TS	LAK12	cpx2
cpx	TS	LAK20	cpx1	49.898	1.199	3.832	0.192	10.007	0.258	15.968	17.442	0.318			0.027	99.141	73.9916					c																								cpx	TS	LAK12	cpx2
cpx	TS	LAK20	cpx1	50.206	1.21	3.572	0.261	9.946	0.232	16.275	17.995	0.295			0.032	100.024	74.4728					c																								cpx	TS	LAK12	cpx2
cpx	TS	LAK20	cpx1c	51.087	0.967	2.923	0.213	9.111	0.225	16.327	18.617	0.286			0.035	99.791	76.1617					c																								cpx	TS	LAK12	cpx2
cpx	TS	LAK20	cpx2r	49.4	1.445	3.778	0.08	11.166	0.282	15.896	17.081	0.316			0.039	99.483	71.7364	73.3137	74.891	71.7364		c																								cpx	TS	LAK12	cpx2c
cpx	TS	LAK20	cpx2c	49.541	1.307	3.863	0.245	9.2	0.234	15.391	19.223	0.339			0.034	99.378	74.891					c																								cpx	TS	LAK12	cpx2GM
cpx	TS	LAK20	cpx4r	51.039	0.959	2.771	0.127	9.135	0.232	15.853	19.304	0.286			0.018	99.726	75.5742	75.2272	74.8801	75.5742		c																								cpx	TS	LAK12	cpx2GM
cpx	TS	LAK20	cpx4c	49.974	1.348	3.85	0.287	9.435	0.263	15.775	18.629	0.293			0.036	99.89	74.8801					c																								cpx	TS	LAK12	cpx2GM
cpx	TS	LAK20	cpx5r	50.901	1.227	2.426	0.074	12.146	0.321	16.308	16.37	0.25			0.027	100.049	70.5346	72.2217	73.9088	70.5346		c
cpx	TS	LAK20	cpx5c	51.448	0.821	1.851	0.072	10.733	0.308	17.053	16.817	0.236			0.034	99.373	73.9088					c																								phase	mount	sample	no.
cpx	TS	LAK20	cpx3r	49.844	1.325	3.797	0.097	10.245	0.263	15.704	17.547	0.332			0.023	99.176	73.211	73.211	73.211	73.211		l																								cpx	TS	LAK20	cpx1r
cpx	TS	LAK20	cpx6r	50.074	1.607	3.573	0.119	10.812	0.279	15.325	17.502	0.284			0.035	99.609	71.6478	73.222	74.7961	71.6478		l																								cpx	TS	LAK20	cpx1
cpx	TS	LAK20	cpx6c	50.167	1.131	3.735	0.201	9.327	0.24	15.525	19.034	0.305			0.023	99.687	74.7961					l																								cpx	TS	LAK20	cpx1
cpx	TS	LAK28	cpx1r	50.431	1.025	2.988	0.046	10.499	0.307	16.174	17.821	0.335			0.019	99.643	73.3089	76.0097	76.7652	73.3089	160.355	c																								cpx	TS	LAK20	cpx1c
cpx	TS	LAK28	cpx1	50.63	1.131	1.969	0.051	12.18	0.317	15.009	17.797	0.28			0.014	99.378	68.7205				148.02	c																								cpx	TS	LAK20	cpx2r
cpx	TS	LAK28	cpx1	50.509	0.995	1.661	0.019	12.27	0.277	15.154	17.849	0.265			0	98.999	68.7689				135.685	c																								cpx	TS	LAK20	cpx2c
cpx	TS	LAK28	cpx1	51.411	0.775	2.149	0.078	9.271	0.222	16.445	19.082	0.267			0.014	99.716	75.9759				123.35	c																								cpx	TS	LAK20	cpx4r
cpx	TS	LAK28	cpx1	51.543	0.781	1.969	0.116	8.4	0.215	16.484	19.849	0.257			0.03	99.645	77.7713				111.015	c																								cpx	TS	LAK20	cpx4c
cpx	TS	LAK28	cpx1	51.749	0.696	1.822	0.141	8.637	0.209	17.067	18.973	0.257			0.017	99.568	77.8909				98.68	c																								cpx	TS	LAK20	cpx5r
cpx	TS	LAK28	cpx1	51.667	0.73	1.81	0.199	8.205	0.245	16.859	19.683	0.226			0.023	99.645	78.5561				86.345	c																								cpx	TS	LAK20	cpx5c
cpx	TS	LAK28	cpx1	51.536	0.727	2.106	0.222	7.855	0.216	16.655	20.039	0.261			0.009	99.627	79.0806				74.01	c																								cpx	TS	LAK20	cpx3r
cpx	TS	LAK28	cpx1	51.812	0.732	1.795	0.147	9.157	0.298	17.728	17.842	0.215			0.025	99.751	77.5365				61.675	c																								cpx	TS	LAK20	cpx6r
cpx	TS	LAK28	cpx1	51.499	0.72	2.125	0.128	9.174	0.269	17.268	17.987	0.247			0.048	99.464	77.0425				49.34	c																								cpx	TS	LAK20	cpx6c
cpx	TS	LAK28	cpx1	51.35	0.818	2.323	0.203	8.37	0.238	16.749	19.224	0.276			0.043	99.595	78.107				37.005	c																								cpx	TS	LAK28	cpx1r
cpx	TS	LAK28	cpx1	50.654	1.143	3.402	0.171	8.969	0.228	15.977	19.01	0.313			0.01	99.877	76.0533				24.67	c																								cpx	TS	LAK28	cpx1
cpx	TS	LAK28	cpx1	51.148	0.852	2.486	0.285	7.867	0.193	16.167	20.287	0.253			0.001	99.541	78.5587				12.335	c																								cpx	TS	LAK28	cpx1
cpx	TS	LAK28	cpx1c	50.228	1.105	3.304	0.221	8.354	0.192	15.481	20.081	0.308			0.036	99.309	76.7652				0	c																								cpx	TS	LAK28	cpx1
cpx	TS	LAK28	cpx4r	50.801	0.815	3.098	0.567	6.628	0.183	16.32	20.595	0.274			0.025	99.306	81.4469	80.6024	80.2385	81.4469	299.829	c																								cpx	TS	LAK28	cpx1
cpx	TS	LAK28	cpx4	50.688	0.884	3.238	0.525	6.879	0.163	16.21	20.565	0.286			0.024	99.461	80.7739				282.192	c																								cpx	TS	LAK28	cpx1
cpx	TS	LAK28	cpx4	50.376	0.857	3.171	0.503	6.939	0.171	16.193	20.648	0.281			0.011	99.151	80.6223				264.555	c																								cpx	TS	LAK28	cpx1
cpx	TS	LAK28	cpx4	50.434	0.86	3.188	0.489	6.904	0.163	16.232	20.533	0.283			0.027	99.112	80.7386				246.918	c																								cpx	TS	LAK28	cpx1
cpx	TS	LAK28	cpx4	50.673	0.866	3.187	0.462	7.108	0.174	16.221	20.475	0.277			0.033	99.476	80.2709				229.281	c																								cpx	TS	LAK28	cpx1
cpx	TS	LAK28	cpx4	49.603	0.905	3.246	0.494	7.021	0.197	16.661	20.534	0.31			0.025	98.995	80.8825				194.007	c																								cpx	TS	LAK28	cpx1
cpx	TS	LAK28	cpx4	50.472	0.903	3.216	0.486	7.026	0.204	16.067	20.369	0.278			0.031	99.052	80.3036				176.37	c																								cpx	TS	LAK28	cpx1
cpx	TS	LAK28	cpx4	50.236	0.913	3.247	0.477	7.025	0.161	16.058	20.388	0.264			0.013	98.783	80.297				158.733	c																								cpx	TS	LAK28	cpx1
cpx	TS	LAK28	cpx4	50.29	0.886	3.257	0.492	6.956	0.192	16.093	20.429	0.288			0.018	98.901	80.4869				141.096	c																								cpx	TS	LAK28	cpx1
cpx	TS	LAK28	cpx4	50.039	0.897	3.253	0.498	7.003	0.19	16.109	20.352	0.271			0.018	98.631	80.3966				123.459	c																								cpx	TS	LAK28	cpx1c
cpx	TS	LAK28	cpx4	50.68	0.862	3.135	0.514	6.911	0.169	16.978	19.933	0.324			0.021	99.527	81.4124				105.822	c																								cpx	TS	LAK28	cpx4r
cpx	TS	LAK28	cpx4	50.198	0.878	3.164	0.509	6.989	0.191	16.173	20.337	0.297			0.026	98.762	80.4905				88.185	c																								cpx	TS	LAK28	cpx4
cpx	TS	LAK28	cpx4	50.127	0.88	3.158	0.526	6.995	0.166	16.152	20.294	0.279			0.03	98.607	80.4566				70.548	c																								cpx	TS	LAK28	cpx4
cpx	TS	LAK28	cpx4	50.131	0.864	3.128	0.531	6.993	0.179	16.139	20.348	0.277			0.023	98.613	80.4484				52.911	c																								cpx	TS	LAK28	cpx4
cpx	TS	LAK28	cpx4	50.294	0.847	3.07	0.495	6.954	0.173	16.21	20.396	0.279			0.03	98.748	80.6049				35.274	c																								cpx	TS	LAK28	cpx4
cpx	TS	LAK28	cpx4	50.124	0.903	3.296	0.55	7.044	0.175	16.176	20.019	0.269			0.047	98.603	80.37				17.637	c																								cpx	TS	LAK28	cpx4
cpx	TS	LAK28	cpx4c	50.148	0.905	3.297	0.488	7.069	0.181	16.099	20.201	0.281			0.014	98.683	80.2385				0	c																								cpx	TS	LAK28	cpx4
cpx	TS	LAK28	cpx2r	50.105	1.087	3.369	0.261	9.397	0.239	16.341	18.087	0.301			0.025	99.21	75.6119	79.5971	78.8224	75.6119	454.195	l																								cpx	TS	LAK28	cpx4
cpx	TS	LAK28	cpx2	51.85	0.711	1.718	0.203	8.298	0.254	16.953	19.194	0.221			0.016	99.42	78.4597				430.29	l																								cpx	TS	LAK28	cpx4
cpx	TS	LAK28	cpx2	50.913	0.778	2.273	0.293	7.422	0.185	16.579	20.245	0.256			0.049	98.992	79.9299				406.385	l																								cpx	TS	LAK28	cpx4
cpx	TS	LAK28	cpx2	50.669	0.737	2.312	0.312	7.337	0.197	16.572	20.032	0.291			0.047	98.505	80.1073				382.48	l																								cpx	TS	LAK28	cpx4
cpx	TS	LAK28	cpx2	50.489	0.95	3.045	0.354	7.876	0.204	16.211	19.748	0.286			0.048	99.212	78.5852				358.575	l																								cpx	TS	LAK28	cpx4
cpx	TS	LAK28	cpx2	51.108	0.729	2.618	0.352	6.826	0.166	16.501	20.654	0.272			0.049	99.277	81.1672				334.67	l																								cpx	TS	LAK28	cpx4
cpx	TS	LAK28	cpx2	51.305	0.713	2.643	0.447	6.764	0.185	16.498	20.663	0.266			0.033	99.516	81.3035				310.765	l																								cpx	TS	LAK28	cpx4
cpx	TS	LAK28	cpx2	51.186	0.703	2.559	0.397	6.702	0.183	16.533	20.624	0.262			0.041	99.19	81.4751				286.86	l																								cpx	TS	LAK28	cpx4
cpx	TS	LAK28	cpx2	51.129	0.703	2.545	0.382	6.786	0.175	16.583	20.712	0.267			0.061	99.344	81.3323				262.955	l																								cpx	TS	LAK28	cpx4
cpx	TS	LAK28	cpx2	51.04	0.725	2.558	0.422	6.696	0.165	16.53	20.714	0.28			0.031	99.161	81.4859				239.05	l																								cpx	TS	LAK28	cpx4c
cpx	TS	LAK28	cpx2	50.463	0.892	3.03	0.451	7.413	0.2	16.49	19.859	0.269			0.06	99.126	79.8629				215.145	l																								cpx	TS	LAK28	cpx2r
cpx	TS	LAK28	cpx2	50.132	0.991	3.422	0.421	7.433	0.183	16.198	20.15	0.27			0.026	99.227	79.5302				191.24	l																								cpx	TS	LAK28	cpx2
cpx	TS	LAK28	cpx2	50.425	0.928	3.271	0.433	7.303	0.203	16.239	20.215	0.278			0.031	99.324	79.8567				167.335	l																								cpx	TS	LAK28	cpx2
cpx	TS	LAK28	cpx2	50.16	1.033	3.49	0.409	7.622	0.198	16.126	19.987	0.279			0.035	99.34	79.0447				143.43	l																								cpx	TS	LAK28	cpx2
cpx	TS	LAK28	cpx2	50.027	1.017	3.384	0.392	7.594	0.203	16.095	20.071	0.291			0.015	99.087	79.0738				119.525	l																								cpx	TS	LAK28	cpx2
cpx	TS	LAK28	cpx2	50.115	1.013	3.354	0.425	7.653	0.181	16.063	20.126	0.288			0.018	99.234	78.9123				95.6203	l																								cpx	TS	LAK28	cpx2
cpx	TS	LAK28	cpx2	50.229	1.003	3.365	0.405	7.571	0.203	16.044	20.13	0.26			0.04	99.251	79.0715				71.7153	l																								cpx	TS	LAK28	cpx2
cpx	TS	LAK28	cpx2	50.578	0.909	2.989	0.304	7.522	0.196	16.082	20.421	0.283			0.042	99.326	79.2177				47.81	l																								cpx	TS	LAK28	cpx2
cpx	TS	LAK28	cpx2	50.937	0.852	2.643	0.29	7.595	0.186	16.115	20.306	0.291			0.05	99.264	79.0922				23.906	l																								cpx	TS	LAK28	cpx2
cpx	TS	LAK28	cpx2c	50.736	0.856	2.639	0.3	7.692	0.209	16.058	20.388	0.276			0.025	99.18	78.8224				0	l																								cpx	TS	LAK28	cpx2
cpx	TS	LAK28	cpx3r	51.34	0.704	1.956	0.075	9.529	0.269	16.828	18.153	0.279			0.013	99.145	75.895	75.7645	74.5196	75.895	200.868	l																								cpx	TS	LAK28	cpx2
cpx	TS	LAK28	cpx3	50.938	0.833	2.171	0.122	9.329	0.264	16.624	18.474	0.279			0.021	99.056	76.0596				190.296	l																								cpx	TS	LAK28	cpx2
cpx	TS	LAK28	cpx3	51.273	0.777	1.921	0.098	9.485	0.251	17.112	17.885	0.252			0.019	99.073	76.2837				179.724	l																								cpx	TS	LAK28	cpx2
cpx	TS	LAK28	cpx3	51.116	0.84	2.211	0.087	10.408	0.292	16.954	17.079	0.224			0.036	99.249	74.3866				169.152	l																								cpx	TS	LAK28	cpx2
cpx	TS	LAK28	cpx3	51.413	0.681	1.726	0.122	9.752	0.282	17.823	17.138	0.259			0.023	99.22	76.5172				148.008	l																								cpx	TS	LAK28	cpx2
cpx	TS	LAK28	cpx3	51.354	0.68	1.591	0.088	10.51	0.311	17.865	16.393	0.233			0.021	99.047	75.1895				126.864	l																								cpx	TS	LAK28	cpx2
cpx	TS	LAK28	cpx3	51.712	0.708	1.567	0.052	10.583	0.311	17.846	16.33	0.218			0.022	99.348	75.0402				116.292	l																								cpx	TS	LAK28	cpx2
cpx	TS	LAK28	cpx3	54.335	0.655	1.61	0.064	10.751	0.326	17.904	15.37	0.212			0.041	101.267	74.8053				105.72	l																								cpx	TS	LAK28	cpx2
cpx	TS	LAK28	cpx3	51.581	0.693	1.673	0.088	10.299	0.298	17.739	16.469	0.231			0.018	99.09	75.435				95.148	l																								cpx	TS	LAK28	cpx2
cpx	TS	LAK28	cpx3	51.671	0.668	1.684	0.104	10.187	0.299	18.061	16.202	0.217			0.022	99.116	75.967				84.576	l																								cpx	TS	LAK28	cpx2c
cpx	TS	LAK28	cpx3	51.802	0.659	1.578	0.122	10.059	0.302	18.062	16.523	0.224			0.024	99.357	76.1981				74.004	l
cpx	TS	LAK28	cpx3	51.692	0.685	1.685	0.144	8.973	0.255	17.333	18.093	0.243			0.04	99.145	77.4975				63.432	l																								phase	mount	sample	no.
cpx	TS	LAK28	cpx3	51.99	0.645	1.723	0.149	9.42	0.294	17.773	17.418	0.24			0.051	99.705	77.0842				52.86	l																								cpx	TS	LAK28	cpx3r
cpx	TS	LAK28	cpx3	51.656	0.706	1.659	0.125	9.322	0.304	17.478	17.691	0.231			0.014	99.186	76.9731				42.288	l																								cpx	TS	LAK28	cpx3
cpx	TS	LAK28	cpx3	51.779	0.682	1.702	0.104	10.079	0.312	17.812	16.866	0.247			0.024	99.607	75.9081				21.144	l																								cpx	TS	LAK28	cpx3
cpx	TS	LAK28	cpx3	50.199	0.596	1.531	0.103	11.061	0.313	17.876	12.403	0.205			0.041	94.328	74.2358				10.572	l																								cpx	TS	LAK28	cpx3
cpx	TS	LAK28	cpx3c	50.918	0.954	2.42	0.183	11.462	0.311	18.802	14.362	0.234			0.039	99.686	74.5196				0	l																								cpx	TS	LAK28	cpx3
cpx	TS	LAK29	cpx3r	50.595	1.001	3.049	0.155	9.483	0.24	16.24	18.451	0.299			0	99.512	75.3284	78.1748	79.1969	75.3284		c																								cpx	TS	LAK28	cpx3
cpx	TS	LAK29	cpx3	49.861	1.196	3.615	0.204	9.587	0.243	15.961	18.129	0.312			0.018	99.126	74.7999					c																								cpx	TS	LAK28	cpx3
cpx	TS	LAK29	cpx3	49.721	1.223	3.677	0.25	9.485	0.231	15.981	18.218	0.311			0.026	99.125	75.0245					c																								cpx	TS	LAK28	cpx3
cpx	TS	LAK29	cpx3	51.067	0.838	2.499	0.244	7.714	0.203	16.098	20.306	0.295			0.03	99.293	78.8163					c																								cpx	TS	LAK28	cpx3
cpx	TS	LAK29	cpx3	51.237	0.824	2.559	0.23	7.64	0.24	15.995	20.503	0.254			0.031	99.512	78.87					c																								cpx	TS	LAK28	cpx3
cpx	TS	LAK29	cpx3	51.257	0.826	2.637	0.235	7.534	0.184	16.044	20.5	0.29			0.028	99.537	79.1524					c																								cpx	TS	LAK28	cpx3
cpx	TS	LAK29	cpx3	50.631	1.011	3.047	0.097	9.728	0.263	16.23	18.056	0.303			0.044	99.41	74.8397					c																								cpx	TS	LAK28	cpx3
cpx	TS	LAK29	cpx3	49.578	1.238	3.726	0.232	9.767	0.251	15.814	18.054	0.31			0.025	98.995	74.2713					c																								cpx	TS	LAK28	cpx3
cpx	TS	LAK29	cpx3	50.819	0.921	2.852	0.325	8.295	0.215	15.925	19.7	0.285			0.022	99.357	77.39					c																								cpx	TS	LAK28	cpx3
cpx	TS	LAK29	cpx3	51.173	0.802	2.6	0.206	7.707	0.177	16.001	20.378	0.285			0.014	99.342	78.7304					c																								cpx	TS	LAK28	cpx3
cpx	TS	LAK29	cpx3	50.917	0.838	2.753	0.252	7.473	0.202	15.957	20.359	0.277			0.017	99.044	79.1968					c																								cpx	TS	LAK28	cpx3
cpx	TS	LAK29	cpx3	50.786	0.826	2.79	0.315	7.453	0.202	16.001	20.345	0.267			0.029	99.013	79.2862					c																								cpx	TS	LAK28	cpx3c
cpx	TS	LAK29	cpx3	50.749	0.886	2.961	0.368	7.43	0.202	15.927	20.356	0.278			0.016	99.173	79.2608					c																								cpx	TS	LAK29	cpx3r
cpx	TS	LAK29	cpx3	51.126	0.833	2.831	0.35	7.392	0.182	16.063	20.361	0.297			0.018	99.453	79.484					c																								cpx	TS	LAK29	cpx3
cpx	TS	LAK29	cpx3	51.016	0.887	2.93	0.392	7.299	0.167	15.949	20.373	0.29			0.032	99.335	79.5741					c																								cpx	TS	LAK29	cpx3
cpx	TS	LAK29	cpx3	51.152	0.818	2.719	0.278	7.286	0.168	16.116	20.4	0.262			0.005	99.204	79.7717					c																								cpx	TS	LAK29	cpx3
cpx	TS	LAK29	cpx3	50.992	0.871	2.848	0.347	7.431	0.195	16.018	20.331	0.283			0.019	99.335	79.3521					c																								cpx	TS	LAK29	cpx3
cpx	TS	LAK29	cpx3	51.609	0.801	2.544	0.255	7.221	0.188	16.211	20.327	0.265			0.036	99.457	80.0101					c																								cpx	TS	LAK29	cpx3
cpx	TS	LAK29	cpx3	51.318	0.828	2.5	0.206	7.393	0.199	16.256	20.268	0.266			0.034	99.267	79.6759					c																								cpx	TS	LAK29	cpx3
cpx	TS	LAK29	cpx3	51.28	0.821	2.64	0.25	7.326	0.199	16.072	20.391	0.259			0.021	99.259	79.6389					c																								cpx	TS	LAK29	cpx3
cpx	TS	LAK29	cpx3c	51.766	0.816	2.574	0.22	7.465	0.187	15.94	20.402	0.269			0.03	99.668	79.1969					c																								cpx	TS	LAK29	cpx3
cpx	TS	LAK29	cpx1r	51.426	0.648	2.19	0.118	9.091	0.249	16.831	18.104	0.284			0.019	98.959	76.7485	74.9197	74.863	76.7485	192.831	l																								cpx	TS	LAK29	cpx3
cpx	TS	LAK29	cpx1	50.832	0.87	2.512	0.123	9.882	0.274	16.639	17.578	0.281			0.039	99.03	75.0122				182.682	l																								cpx	TS	LAK29	cpx3
cpx	TS	LAK29	cpx1	51.695	0.717	2.04	0.115	9.921	0.278	17.609	16.729	0.238			0.025	99.367	75.9873				172.533	l																								cpx	TS	LAK29	cpx3
cpx	TS	LAK29	cpx1	51.542	0.638	1.785	0.154	9.266	0.261	17.599	17.241	0.267			0.009	98.763	77.2014				162.384	l																								cpx	TS	LAK29	cpx3
cpx	TS	LAK29	cpx1	52.025	0.593	1.608	0.15	9.753	0.265	18.279	16.067	0.232			0.026	98.996	76.9663				152.235	l																								cpx	TS	LAK29	cpx3
cpx	TS	LAK29	cpx1	51.957	0.599	1.633	0.158	10.284	0.317	18.501	15.296	0.221			0.018	98.984	76.2324				142.086	l																								cpx	TS	LAK29	cpx3
cpx	TS	LAK29	cpx1	52.088	0.65	1.633	0.131	10.291	0.338	18.165	15.735	0.226			0.03	99.286	75.8863				131.937	l																								cpx	TS	LAK29	cpx3
cpx	TS	LAK29	cpx1	51.775	0.645	1.585	0.129	10.684	0.314	18.371	15.183	0.201			0.024	98.913	75.4036				121.788	l																								cpx	TS	LAK29	cpx3
cpx	TS	LAK29	cpx1	49.071	1.379	3.783	0.187	10.507	0.279	15.855	16.91	0.323			0.018	98.312	72.9023				111.639	l																								cpx	TS	LAK29	cpx3
cpx	TS	LAK29	cpx1	48.471	1.637	4.125	0.185	9.83	0.247	15.015	18.628	0.32			0.033	98.491	73.142				101.49	l																								cpx	TS	LAK29	cpx3
cpx	TS	LAK29	cpx1	49.821	1.291	3.513	0.197	9.589	0.271	15.597	18.513	0.303			0.011	99.106	74.3586				91.341	l																								cpx	TS	LAK29	cpx3
cpx	TS	LAK29	cpx1	49.71	1.32	3.765	0.229	9.488	0.235	15.388	18.813	0.322			0.036	99.306	74.3032				81.192	l																								cpx	TS	LAK29	cpx3c
cpx	TS	LAK29	cpx1	48.966	1.607	4.163	0.217	9.932	0.244	15.011	18.693	0.327			0.021	99.181	72.9335				71.043	l																								cpx	TS	LAK29	cpx1r
cpx	TS	LAK29	cpx1	49.228	1.291	4.243	0.223	9.539	0.241	15.064	18.66	0.335			0.024	98.848	73.7913				60.894	l																								cpx	TS	LAK29	cpx1
cpx	TS	LAK29	cpx1	49.726	1.261	3.947	0.197	9.597	0.24	15.274	18.651	0.311			0.025	99.228	73.9415				50.745	l																								cpx	TS	LAK29	cpx1
cpx	TS	LAK29	cpx1	49.649	1.24	4.02	0.23	9.315	0.191	15.259	18.806	0.331			0.02	99.061	74.4934				40.596	l																								cpx	TS	LAK29	cpx1
cpx	TS	LAK29	cpx1	49.794	1.19	3.855	0.236	9.669	0.262	15.725	18.009	0.322			0.014	99.078	74.356				30.447	l																								cpx	TS	LAK29	cpx1
cpx	TS	LAK29	cpx1	49.629	1.272	3.709	0.279	9.063	0.246	15.21	19.188	0.322			0	98.919	74.9507				10.149	l																								cpx	TS	LAK29	cpx1
cpx	TS	LAK29	cpx1c	49.857	1.266	3.751	0.291	9.097	0.227	15.196	19.509	0.32			0.043	99.556	74.863				0	l																								cpx	TS	LAK29	cpx1
cpx	TS	LAK29	cpx2rGM	51.982	0.74	1.796	0.09	9.176	0.269	16.74	18.721	0.254			0.032	99.8	76.4847				36.126	l																								cpx	TS	LAK29	cpx1
cpx	TS	LAK29	cpx2GM	51.873	0.709	1.806	0.091	9.017	0.263	16.863	18.747	0.244			0.03	99.644	76.9278				24.084	l																								cpx	TS	LAK29	cpx1
cpx	TS	LAK29	cpx2cGM	51.8	0.643	1.663	0.155	9.323	0.262	17.631	17.448	0.235			0.019	99.178	77.1254				0	l																								cpx	TS	LAK29	cpx1
cpx	PM	LAKt07	cpx1c	50.188	1.113	3.655	0.104	9.859	0.232	15.397	18.666	0.354			0.035	99.604	73.5754					n/a
cpx	PM	LAKt07	cpx1r	49.392	1.386	4.129	0.112	9.753	0.23	14.856	19.213	0.359			0.023	99.454	73.0873					n/a
cpx	PM	LAKt07	cpx2c	50.021	1.169	3.594	0.3	9.184	0.231	15.914	18.848	0.323			0.024	99.608	75.5463					n/a
cpx	PM	LAKt07	cpx2r	50.068	1.117	3.78	0.127	9.673	0.231	15.53	18.693	0.355			0.04	99.615	74.1094					n/a
cpx	PM	LAKt07	cpx3c	49.412	1.431	4.134	0.036	11.204	0.289	15.086	17.672	0.359			0.034	99.658	70.5936					n/a
cpx	PM	LAKt07	cpx3r	49.776	1.222	3.807	0.263	9.21	0.218	15.551	19.133	0.313			0.022	99.515	75.0647					n/a
cpx	PM	LAKt07	cpx4c	51.552	0.758	2.338	0.127	9.406	0.256	16.816	18.018	0.281			0.03	99.582	76.119					n/a
cpx	PM	LAKt07	cpx4r	51.109	0.887	2.575	0.14	8.9	0.227	16.324	19.138	0.285			0.019	99.603	76.5812					n/a
cpx	PM	LAKt07	cpx5c	50.989	0.914	2.751	0.114	9.301	0.228	16.341	18.522	0.29			0.026	99.477	75.8007					n/a
cpx	PM	LAKt07	cpx5r	51.176	0.883	2.591	0.134	9.314	0.226	16.401	18.641	0.281			0.026	99.673	75.8423					n/a
cpx	PM	LAKt07	cpx6c	50.069	1.13	3.489	0.169	9.164	0.219	15.346	19.582	0.329			0	99.498	74.9097					n/a
cpx	PM	LAKt07	cpx6r	50.366	0.96	2.881	0.256	8.735	0.217	15.841	19.445	0.303			0.028	99.032	76.3776					n/a
cpx	PM	LAKt07	cpx6	48.628	1.78	4.216	0.204	9.999	0.222	14.936	18.818	0.32			0.052	99.175	72.7013					n/a
cpx	PM	LAKt23	cpx1	51.594	0.708	1.815	0.089	9.65	0.279	17.251	17.578	0.226			0.026	99.216	76.1177					n/a
cpx	PM	LAKt23	cpx1	51.78	0.748	1.847	0.095	11.227	0.357	18.686	14.71	0.192			0.046	99.688	74.7945					n/a
cpx	PM	LAKt23	cpx2	49.42	1.416	3.944	0.112	10.025	0.271	15.308	18.479	0.322			0.017	99.314	73.1358					n/a
cpx	PM	LAKt23	cpx2	49.978	1.233	3.646	0.223	8.803	0.236	15.493	19.572	0.314			0.044	99.542	75.8326					n/a
cpx	PM	LAKt23	cpx3r	49.683	1.311	3.745	0.192	9.19	0.253	15.695	18.775	0.319			0.008	99.17	75.2773					n/a
cpx	PM	LAKt23	cpx3c	49.539	1.396	4.279	0.268	9.728	0.296	15.847	17.912	0.316			0.026	99.608	74.3874					n/a
cpx	PM	LAKt23	cpx4r	49.994	1.137	3.346	0.237	9.094	0.246	16.068	18.754	0.305			0.05	99.231	75.9044					n/a
cpx	PM	LAKt23	cpx4c	49.594	1.208	3.707	0.24	9.213	0.232	15.558	18.773	0.336			0.032	98.893	75.067					n/a
cpx	PM	LAKt23	cpx5r	49.894	1.225	3.691	0.259	9.161	0.247	15.704	18.974	0.308			0.038	99.501	75.3467					n/a
cpx	PM	LAKt23	cpx5c	49.721	1.316	3.733	0.256	9.089	0.233	15.462	19.36	0.32			0.019	99.51	75.2045					n/a
cpx	PM	LAKt23	cpx6	50.349	1.091	3.397	0.24	8.884	0.216	15.853	19.292	0.322			0.018	99.663	76.0848					n/a
cpx	PM	LAKt23	cpx7r	48.636	1.635	3.727	0.076	10.457	0.242	14.64	19.091	0.314			0.041	98.859	71.3964					n/a
cpx	PM	LAKt23	cpx7	48.156	1.663	3.919	0.101	10.821	0.244	14.796	18.752	0.305			0.037	98.793	70.9117					n/a
cpx	PM	LAKt23	cpx7c	49.685	1.214	3.69	0.173	9.86	0.29	16.145	17.952	0.323			0.003	99.335	74.4854					n/a
cpx	PM	LAKt24	cpx1r	49.842	1.15	3.506	0.169	9.277	0.242	15.832	18.895	0.329			0.018	99.26	75.2637					n/a
cpx	PM	LAKt24	cox1c	49.427	1.251	3.83	0.356	9.167	0.222	15.677	19.094	0.31			0.03	99.364	75.3025					n/a
cpx	PM	LAKt24	cpx3r	50.355	1.082	3.057	0.223	9.027	0.238	16.19	18.927	0.292			0.016	99.407	76.1769					n/a
cpx	PM	LAKt24	cpx3c	50.797	0.826	2.32	0.134	8.898	0.247	16.676	18.954	0.286			0.048	99.184	76.9657					n/a
cpx	PM	LAKt24	cpx4r	48.057	2.181	5.469	0.107	11.289	0.264	14	17.553	0.421			0.056	99.397	68.8573					n/a
cpx	PM	LAKt24	cpx4c	49.373	1.215	3.511	0.167	9.213	0.241	15.655	19.722	0.315			0.043	99.455	75.1831					n/a
cpx	PM	LAKt24	cpx5r	51.16	0.867	2.411	0.158	8.456	0.215	16.22	19.68	0.273			0.027	99.468	77.3748					n/a
cpx	PM	LAKt24	cpx5	49.534	1.248	3.278	0.307	8.903	0.227	15.848	19.19	0.311			0.05	98.898	76.0402					n/a
cpx	PM	LAKt24	cpx5c	48.947	1.321	3.755	0.328	8.906	0.232	15.574	19.249	0.302			0.03	98.645	75.7148					n/a
cpx	PM	LAKt24	cpx6r	49.73	1.125	3.108	0.1	10.463	0.266	16.067	17.867	0.316			0.015	99.057	73.2462					n/a
cpx	PM	LAKt24	cpx6c	48.603	1.52	4.143	0.254	10.13	0.273	15.934	18.102	0.306			0.024	99.287	73.7145					n/a
cpx	PM	LAKt24	cpx7r	51.12	1.066	3.585	0.098	9.968	0.25	15.511	17.808	0.42			0.041	99.868	73.505					n/a
cpx	PM	LAKt24	cpx7c	48.969	1.675	4.015	0.187	10.748	0.275	15.88	17.518	0.313			0.01	99.589	72.4834					n/a
cpx	PM	LAKt25	cpx1r	50.353	0.939	3.015	0.117	9.318	0.265	15.564	18.23	0.44			0.043	98.283	74.8615					n/a
cpx	PM	LAKt25	cpx1c	49.754	1.301	3.528	0.206	9.846	0.232	15.545	19.119	0.313			0.019	99.863	73.7865					n/a
cpx	PM	LAKt25	cpx2r	50.642	0.931	2.427	0.116	9.474	0.272	16.278	18.62	0.282			0.019	99.061	75.3895					n/a
cpx	PM	LAKt25	cox2c	50.51	0.874	2.431	0.158	8.935	0.23	16.333	19.451	0.273			0.048	99.242	76.5207					n/a
cpx	PM	LAKt25	cpx3r	50.316	0.971	2.707	0.136	8.847	0.228	15.955	19.644	0.29			0.025	99.119	76.2769					n/a
cpx	PM	LAKt25	cpx3	50.972	0.821	2.216	0.133	8.63	0.217	16.323	19.733	0.304			0.03	99.379	77.1281					n/a
cpx	PM	LAKt25	cpx3	49.068	1.468	3.983	0.181	10.042	0.286	15.63	18.323	0.318			0.028	99.328	73.5098					n/a
cpx	PM	LAKt25	cpx3	50.281	1.08	2.741	0.112	9.564	0.245	16.058	18.981	0.291			0.018	99.37	74.9591					n/a
cpx	PM	LAKt25	cpx3c	50.637	1.201	3.441	0.13	9.787	0.236	15.186	18.511	0.356			0.003	99.488	73.4495					n/a
cpx	PM	LAKt25	cpx4r	50.321	1.086	2.792	0.126	9.542	0.262	16.173	18.653	0.266			0.021	99.242	75.1358					n/a
cpx	PM	LAKt25	cpx4	49.651	1.09	3.719	0.162	9.487	0.247	15.818	18.68	0.349			0	99.202	74.8279					n/a
cpx	PM	LAKt25	cpx4	49.622	1.115	3.691	0.155	9.416	0.249	15.793	18.737	0.337			0.01	99.123	74.9395					n/a
cpx	PM	LAKt25	cpx4	49.67	1.089	3.643	0.178	9.452	0.262	15.97	18.567	0.343			0.04	99.211	75.0768					n/a
cpx	PM	LAKt25	cpx4	49.76	1.134	3.706	0.199	9.373	0.283	15.976	18.619	0.34			0.034	99.424	75.2406					n/a
cpx	PM	LAKt25	cpx4	50.312	0.932	2.89	0.163	8.949	0.223	16.433	18.894	0.294			0.048	99.139	76.6021					n/a
cpx	PM	LAKt25	cpx4	49.764	1.275	4.247	0.263	9.041	0.245	15.522	18.891	0.387			0.027	99.662	75.3751					n/a
cpx	PM	LAKt25	cpx4	49.511	1.117	3.433	0.252	9.021	0.247	16.039	18.963	0.319			0.039	98.94	76.0186					n/a
cpx	PM	LAKt25	cpx4	50.873	0.878	2.729	0.215	9.239	0.279	16.975	18.024	0.268			0.041	99.52	76.6121					n/a
cpx	PM	LAKt25	cpx4	50.253	1.07	3.308	0.297	8.928	0.266	16.22	18.997	0.297			0.024	99.66	76.4098					n/a
cpx	PM	LAKt25	cpx4	51.125	0.829	2.451	0.244	9.099	0.279	16.768	18.598	0.255			0.029	99.678	76.6658					n/a
cpx	PM	LAKt25	cpx4	51.163	0.841	2.331	0.202	9.038	0.25	16.446	18.919	0.271			0.036	99.496	76.4385					n/a
cpx	PM	LAKt25	cpx4	50.065	1.221	2.581	0.07	11.495	0.374	15.582	18.105	0.308			0.03	99.829	70.7326					n/a
cpx	PM	LAKt25	cpx4	50.205	1.198	2.595	0.043	11.913	0.378	14.685	18.138	0.329			0.032	99.518	68.7278					n/a
cpx	PM	LAKt25	cpx4	49.952	0.96	2.122	0.062	11.752	0.407	14.223	19.607	0.289			0.028	99.402	68.3319					n/a
cpx	PM	LAKt25	cpx4	49.266	1.224	2.68	0.067	11.837	0.392	14.086	19.463	0.31			0.033	99.359	67.9654					n/a
cpx	PM	LAKt25	cpx4	50.051	1.04	2.251	0.083	11.328	0.415	14.12	20.075	0.294			0.007	99.665	68.9663					n/a
cpx	PM	LAKt25	cpx4	50.069	1.071	2.237	0.074	11.41	0.371	13.511	20.639	0.276			0.021	99.678	67.8578					n/a
cpx	PM	LAKt25	cpx4c	50.064	1.133	2.329	0.122	11.642	0.371	13.366	20.501	0.28			0.009	99.816	67.1797					n/a
cpx	PM	LAKt25	cpx5r	48.647	1.391	3.784	0.094	10.148	0.231	14.84	19.376	0.333			0.021	98.865	72.2777					n/a
cpx	PM	LAKt25	cpx5c	50.623	0.942	2.772	0.144	8.991	0.266	16.052	19.467	0.302			0.06	99.619	76.094					n/a
cpx	PM	LAKt25	cpx6c	48.987	1.214	3.759	0.36	8.683	0.199	15.277	20.065	0.316			0	98.861	75.8269					n/a																					cpx	TS	LAK29	cpx1	49.821	1.291	3.513
																																														cpx	TS	LAK29	cpx1
phase	mount	sample	no.	SiO2	TiO2	Al2O3	Cr2O3	FeO	MnO	MgO	CaO	Na2O	K2O	P2O5	NiO	Total	Mg# (Fe2+)	Mg# xtal av	Mg# core	Mg# rim	µm from core	type																								cpx	TS	LAK29	cpx1
olv	TS	LAK01	ol2r	36.802	0.012	0.033	0.002	29.24	0.412	33.137	0.356	0.008			0.088	100.09	66.8928	74.0895	67.2851	66.8928		c																								cpx	TS	LAK29	cpx1
olv	TS	LAK01	ol2	37.574	0	0.01	0.015	25.248	0.366	36.732	0.293	0.015			0.099	100.351	72.1744					c																								cpx	TS	LAK29	cpx1
olv	TS	LAK01	ol2	38.089	0	0.038	0.031	22.2	0.337	39.3	0.289	0.006			0.095	100.385	75.9394					c																								cpx	TS	LAK29	cpx1
olv	TS	LAK01	ol2	37.967	0	0.04	0.021	21.153	0.319	40.254	0.294	0.022			0.125	100.195	77.2355					c																								cpx	TS	LAK29	cpx1
olv	TS	LAK01	ol2	38.249	0	0.029	0.024	20.827	0.335	40.475	0.304	0.014			0.121	100.379	77.6027					c																								cpx	TS	LAK29	cpx1
olv	TS	LAK01	ol2	38.329	0	0.044	0.035	20.63	0.346	40.718	0.296	0.005			0.131	100.535	77.8708					c																								cpx	TS	LAK29	cpx1c
olv	TS	LAK01	ol2c	38.116	0	0.058	0.014	20.834	0.341	40.751	0.3	0.007			0.123	100.543	77.7148					c																								cpx	TS	LAK29	cpx2rGM
olv	TS	LAK01	ol1r	36.721	0.003	0.055	0.024	29.24	0.443	33.731	0.305	0.015			0.081	100.618	67.2851	71.9123	74.6935	67.2851		l																								cpx	TS	LAK29	cpx2GM
olv	TS	LAK01	ol1	37.665	0.003	0.064	0.005	24.189	0.369	38.134	0.276	0.008			0.106	100.819	73.7582					l																								cpx	TS	LAK29	cpx2cGM
olv	TS	LAK01	ol1c	37.462	0	0.038	0.028	23.338	0.33	38.636	0.289	0.023			0.104	100.247	74.6935					l
olv	TS	LAK01	ol3rGM	36.279	0.025	0.042	0.023	32.046	0.463	31.489	0.318	0.024			0.078	100.787	63.6613	67.0734	70.4855	63.6613		l
olv	TS	LAK01	ol3cGM	37.068	0.002	0.056	0.02	26.825	0.38	35.932	0.276	0.011			0.097	100.668	70.4855					l
olv	TS	LAK01	ol4rGM	36.37	0.041	0.038	0	31.052	0.488	31.968	0.341	0.019			0.071	100.388	64.7325	66.16	67.5874	64.7325		l
olv	TS	LAK01	ol4cGM	36.766	0.012	0.061	0.012	29.107	0.42	34.043	0.27	0.022			0.091	100.804	67.5874					l
olv	TS	LAK01	ol5rGM	36.662	0.032	0.053	0.024	28.945	0.413	33.802	0.313	0.013			0.085	100.341	67.554	70.9945	74.4349	67.554		l
olv	TS	LAK01	ol5cGM	37.759	0.002	0.072	0.035	23.512	0.368	38.397	0.275	0.012			0.102	100.533	74.4349					l
olv	PM	LAK01a	ol1c	38.8487	0	0.0571	0.0315	25.2701	0.3484	35.1274	0.2602	0			0.0924	100.036	71.2506	66.5951	71.2506	61.9396		n/a
olv	PM	LAK01a	ol1r	37.102	0.0237	0.023	0.0053	32.1948	0.4631	29.3872	0.3159	0			0.0392	99.5542	61.9396					n/a
olv	PM	LAK01a	ol2c	38.8832	0.0068	0.0403	0	24.7732	0.359	35.8645	0.2798	0			0.0925	100.299	72.0756	69.134	72.0756	66.1923		n/a
olv	PM	LAK01a	ol2r	37.93	0.0174	0.0226	0	29.1313	0.3937	31.9912	0.2935	0			0.0423	99.822	66.1923					n/a
olv	PM	LAK01a	ol3c	40.9188	0	0.0817	0.073	13.691	0.1924	44.6394	0.291	0			0.1833	100.07	85.3223	85.2872	85.3223	85.252		n/a
olv	PM	LAK01a	ol3r	40.955	0	0.0739	0.0033	13.6097	0.173	44.1265	0.2959	0			0.1942	99.4314	85.252					n/a
olv	PM	LAK01a	ol4c	39.2084	0.0187	0.0205	0.0116	21.572	0.3377	37.8784	0.2713	0.0051			0.1022	99.4258	75.7902	71.4231	75.7902	67.0559		n/a
olv	PM	LAK01a	ol4r	37.9601	0.0274	0.0475	0.012	28.27	0.3907	32.2748	0.27	0			0.0598	99.312	67.0559					n/a
olv	PM	LAK01a	ol5c	40.7344	0	0.0538	0.0592	13.6657	0.2109	44.306	0.3061	0			0.1877	99.5238	85.2514	80.2541	85.2514	75.2567		n/a
olv	PM	LAK01a	ol5r	39.2293	0.0054	0.0977	0.0569	21.6396	0.3165	36.916	0.2575	0			0.0941	98.6129	75.2567					n/a
olv	PM	LAK01a	ol6c	41.052	0.0108	0.0886	0.0492	13.9535	0.2022	44.3182	0.3128	0			0.1888	100.176	84.991	80.6929	84.991	76.3949		n/a
olv	PM	LAK01a	ol6r	39.535	0.0009	0.0513	0.0025	21.0806	0.2807	38.2665	0.2718	0			0.1395	99.6289	76.3949					n/a
olv	PM	LAK01a	ol7c	40.7427	0.0101	0.1279	0.0393	13.6717	0.1967	44.1484	0.2879	0			0.1931	99.4179	85.2011	85.3174	85.2011	85.4337		n/a
olv	PM	LAK01a	ol7r	41.042	0	0.113	0.0136	13.5013	0.2036	44.4154	0.2825	0.0039			0.2139	99.7892	85.4337					n/a
olv	PM	LAK01a	ol8c	41	0.0022	0.0463	0.0498	13.5391	0.1648	44.3745	0.2964	0			0.2402	99.7133	85.3874	81.3674	85.3874	77.3475		n/a
olv	PM	LAK01a	ol8r	39.9944	0.0076	0.0333	0.0161	20.1524	0.2817	38.5954	0.2755	0			0.1299	99.4864	77.3475					n/a
olv	PM	LAK01a	ol9c	40.7477	0.004	0.062	0.0192	13.5522	0.202	43.7055	0.3095	0.0062			0.2011	98.8093	85.1846	76.8629	85.1846	68.5412		n/a
olv	PM	LAK01a	ol9r	37.981	0.0303	0.05	0.0348	26.962	0.3778	32.9488	0.2891	0			0.1062	98.7801	68.5412					n/a
olv	PM	LAK01a	ol10c	40.8699	0.0006	0.0334	0.0621	13.9425	0.2066	43.6257	0.2934	0			0.2107	99.2449	84.7991	85.4437	86.0882	84.7991		n/a
olv	PM	LAK01a	ol10r	41.037	0	0.0364	0.044	12.7969	0.1785	44.4163	0.2971	0			0.2216	99.0277	86.0882					n/a
olv	PM	LAK01a	ol11c	39.7931	0.008	0.0507	0.0143	19.197	0.2649	39.5499	0.2937	0			0.1261	99.2977	78.601	72.4761	78.601	66.3512		n/a
olv	PM	LAK01a	ol11r	37.9219	0.0157	0.0076	0	28.6889	0.4069	31.7301	0.2972	0			0.1093	99.1777	66.3512					n/a
olv	PM	LAK01a	ol12c	38.7868	0.0166	0.0636	0.0135	23.4046	0.3657	36.7527	0.2663	0			0.1037	99.7736	73.6821	73.7537	73.6821	73.8254		n/a
olv	PM	LAK01a	ol12r	38.9847	0.0195	0.0378	0.021	22.7494	0.3518	35.9894	0.2755	0			0.0825	98.5114	73.8254					n/a
olv	PM	LAK01b	ol1c	37.467	0.0136	0.0401	0	28.5258	0.4471	34.3399	0.2553	0			0.0601	101.149	68.2163	70.0028	68.2163	71.7893		n/a
olv	PM	LAK01b	ol1c	38.1755	0.0113	0.1438	0.0324	25.543	0.3557	36.4583	0.2554	0			0.0858	101.061	71.7893					n/a
olv	PM	LAK01b	ol2c	39.0437	0.0196	0.0643	0.0317	19.0335	0.2948	41.7725	0.2892	0.0001			0.1097	100.659	79.6452	72.7352	79.6452	65.8252		n/a
olv	PM	LAK01b	ol2r	37.182	0.0234	0.0505	0.0322	30.0169	0.3793	32.4287	0.3094	0			0.0599	100.482	65.8252					n/a
olv	PM	LAK01b	ol3c	38.6197	0.0196	0.0728	0	23.2275	0.3225	38.0954	0.2704	0			0.0425	100.67	74.5164	70.393	74.5164	66.2695		n/a
olv	PM	LAK01b	ol3r	37.234	0.0221	0.0439	0.0193	29.8929	0.4426	32.9411	0.3221	0			0.0711	100.989	66.2695					n/a
olv	PM	LAK01b	ol4c	40.038	0.0087	0.0358	0.0308	14.7302	0.1745	44.4236	0.3059	-0.0058			0.2279	99.9754	84.3182	83.4671	84.3182	82.6159		n/a
olv	PM	LAK01b	ol4r	40.2413	0.0069	0.0504	0.0281	16.0842	0.2223	42.8735	0.2878	-0.0178			0.1782	99.9726	82.6159					n/a
olv	PM	LAK01b	ol5c	39.1828	0.0021	0.0295	0.0133	18.2015	0.2405	41.3066	0.2965	-0.0129			0.1429	99.4157	80.1826	79.9996	80.1826	79.8166		n/a
olv	PM	LAK01b	ol5r	39.4113	0.012	0.0106	0.0252	18.4118	0.2461	40.8389	0.2924	-0.0174			0.1548	99.4031	79.8166					n/a
olv	PM	LAK01b	ol6c	39.6118	0.0054	0.0025	0.035	16.9366	0.267	42.0972	0.3071	-0.0234			0.2081	99.4707	81.5888	75.172	81.5888	68.7551		n/a
olv	PM	LAK01b	ol6r	37.5239	0.0116	0.0274	0.0054	27.4107	0.4063	33.8318	0.2667	-0.0449			0.0567	99.5404	68.7551					n/a
olv	PM	LAK01b	ol7c	37.8445	0.0231	0.0135	-0.0022	25.9465	0.4106	35.6529	0.2745	-0.0363			0.0687	100.234	71.0132	71.5281	71.0132	72.043		n/a
olv	PM	LAK01b	ol7r	37.7576	0.0136	0.0067	0.0021	25.0238	0.3902	36.1687	0.2536	-0.0355			0.0673	99.6835	72.043					n/a
olv	PM	LAK01b	ol8c	40.2038	0.0029	0.0095	0.0445	14.0601	0.2232	45.5444	0.3197	-0.0166			0.2127	100.621	85.2403	80.9099	85.2403	76.5795		n/a
olv	PM	LAK01b	ol8r	38.2847	0.015	0.0181	0.0261	21.3457	0.2732	39.1476	0.2784	-0.0266			0.1385	99.5274	76.5795					n/a
olv	PM	LAK01b	ol9c	39.7119	0.0119	0.0538	0.0498	16.6512	0.2465	42.6829	0.3082	-0.0228			0.1875	99.9037	82.0472	74.8656	82.0472	67.6841		n/a
olv	PM	LAK01b	ol9r	37.5237	0.0175	-0.0249	-0.0037	28.4893	0.4133	33.468	0.266	-0.0274			0.0414	100.219	67.6841					n/a
olv	PM	LAK01b	ol10c	40.1761	-0.002	0.0009	0.0475	14.0419	0.1792	45.3249	0.3006	-0.0074			0.2258	100.297	85.1958	83.0373	85.1958	80.8788		n/a
olv	PM	LAK01b	ol10r	39.9196	0.0029	0.0226	0.0462	17.6208	0.2488	41.8045	0.2752	-0.0223			0.2333	100.174	80.8788					n/a
olv	PM	LAK01b	ol11c	37.8	0.0112	-0.0023	0.0084	25.3652	0.3727	36.1937	0.282	-0.0323			0.0658	100.099	71.7833	71.0024	71.7833	70.2216		n/a
olv	PM	LAK01b	ol11r	37.521	0.0126	0.0119	0.0079	26.1972	0.3958	34.6499	0.2693	-0.0529			0.0583	99.124	70.2216					n/a
olv	PM	LAK01b	ol12c	39.5313	0.0095	0.032	0.0159	17.6303	0.2738	41.6809	0.3123	-0.0168			0.1735	99.6594	80.8246	76.2059	80.8246	71.5872		n/a
olv	PM	LAK01b	ol12r	37.9266	0.0114	0.0215	0.0138	25.0986	0.329	35.4691	0.2728	-0.0284			0.1133	99.2561	71.5872					n/a
olv	PM	LAK01b	ol13c	39.918	0.0531	0.3139	0.0332	18.519	0.2849	39.9601	0.4906	-0.0047			0.0971	99.6698	79.369	74.2782	79.369	69.1874		n/a
olv	PM	LAK01b	ol13r	37.8306	0.021	0.0089	0.0284	27.0444	0.4006	34.0607	0.2835	-0.0367			0.1037	99.7817	69.1874					n/a
olv	PM	LAK01c	ol1c	40.0091	0.0123	0.0366	0.038	13.9157	0.2129	45.708	0.2929	-0.0071			0.2635	100.489	85.4145	85.5138	85.4145	85.6131		n/a
olv	PM	LAK01c	ol1r	40.0901	0.011	0.0473	0.0274	13.6817	0.193	45.6657	0.2958	0.0044			0.2343	100.251	85.6131					n/a
olv	PM	LAK01c	ol2c	40.5304	-0.0067	0.0445	0.0375	13.9835	0.2336	45.467	0.2952	-0.0072			0.2157	100.808	85.2876	85.3528	85.2876	85.4179		n/a
olv	PM	LAK01c	ol2r	40.234	0.004	0.0547	0.0453	13.8061	0.188	45.3607	0.2966	-0.0025			0.181	100.17	85.4179					n/a
olv	PM	LAK01c	ol3c	40.3743	0.0034	0.0578	0.05	13.7796	0.2111	45.3544	0.2884	-0.0068			0.2053	100.324	85.4401	85.4328	85.4401	85.4254		n/a
olv	PM	LAK01c	ol3r	40.2691	0.0044	0.0499	0.0344	13.8268	0.2219	45.456	0.2872	-0.0098			0.2099	100.359	85.4254					n/a
olv	PM	LAK01c	ol4c	40.0181	-0.0033	0.0413	0.0452	13.8906	0.1878	45.6304	0.3004	-0.0069			0.2471	100.361	85.4158	78.671	85.4158	71.9262		n/a
olv	PM	LAK01c	ol4r	38.1174	0.008	0.0268	0.0415	25.2495	0.3636	36.2842	0.2701	-0.0319			0.1223	100.484	71.9262					n/a
olv	PM	LAK01c	ol5c	39.7572	0.0073	0.0491	0.0413	14.4161	0.2346	45.2027	0.2914	-0.0115			0.1984	100.198	84.8263	84.8076	84.8263	84.7888		n/a
olv	PM	LAK01c	ol5r	39.8752	-0.003	0.0354	0.0337	14.4554	0.2215	45.1944	0.2929	-0.0084			0.2073	100.316	84.7888					n/a
olv	PM	LAK01c	ol6c	39.09	0.0169	0.0356	0.02	18.8881	0.3076	41.5704	0.2743	-0.0221			0.1429	100.346	79.6909	73.2318	79.6909	66.7726		n/a
olv	PM	LAK01c	ol6r	37.2076	0.0213	0.0222	0.0027	29.2627	0.4121	32.9834	0.289	-0.0296			0.0767	100.278	66.7726					n/a
olv	PM	LAK02	ol1c	38.8394	0.0113	0.0383	0.0327	23.1294	0.3183	36.5609	0.2784	0			0.107	99.3158	73.8098	74.0509	73.8098	74.2921		n/a
olv	PM	LAK02	ol1r	38.6473	0.0117	0.0439	0	22.6167	0.3272	36.6593	0.274	0			0.0726	98.6527	74.2921					n/a
olv	PM	LAK02	ol2c	39.9714	0.0106	0.049	0	18.0114	0.2709	40.6349	0.3018	0			0.13	99.3799	80.0888	76.195	80.0888	72.3012		n/a
olv	PM	LAK02	ol2r	38.566	0.0194	0.0294	0	24.2249	0.3443	35.4671	0.2987	0			0.116	99.0658	72.3012					n/a
olv	PM	LAK02	ol3c	39.1303	0.0144	0.039	0.0231	22.7997	0.3579	36.6853	0.2592	0			0.0801	99.389	74.1515	70.6328	74.1515	67.1141		n/a
olv	PM	LAK02	ol3r	37.8373	0.016	0.0394	0	27.9203	0.3594	31.9597	0.2648	0			0.0879	98.4847	67.1141					n/a
olv	PM	LAK02	ol4c	38.8632	0.0217	0.0412	0.0087	22.8487	0.3039	36.5753	0.2634	0			0.0694	98.9954	74.0527	74.1844	74.0527	74.3161		n/a
olv	PM	LAK02	ol4r	39.3406	0.0195	0.0183	0.0261	22.6368	0.3427	36.738	0.2682	0			0.0813	99.4715	74.3161					n/a
olv	PM	LAK02	ol5c	38.8222	0.0114	0.039	0.0127	22.72	0.2905	36.5795	0.269	0			0.1112	98.8556	74.1633	70.7017	74.1633	67.24		n/a
olv	PM	LAK02	ol5r	38.3084	0.0231	0.0093	0.0013	27.9841	0.4428	32.2162	0.2602	0			0.0743	99.3196	67.24					n/a
olv	PM	LAK02	ol6c	39.5264	0.0137	0.0018	0.0134	19.5645	0.3226	39.6637	0.2897	0			0.1185	99.5143	78.3291	76.5713	78.3291	74.8135		n/a
olv	PM	LAK02	ol6r	39.0185	0.0037	0.008	0.0524	22.3649	0.3139	37.2613	0.2927	0			0.0573	99.3728	74.8135					n/a
olv	PM	LAK02	ol7c	39.7525	0.0125	0.0345	0	19.6314	0.2385	39.4115	0.2884	0			0.1034	99.4727	78.1624	74.144	78.1624	70.1256		n/a
olv	PM	LAK02	ol7r	38.5619	0.0047	0.0641	0.012	26.0346	0.371	34.2773	0.2643	0			0.0935	99.6833	70.1256					n/a
olv	PM	LAK02	ol8c	39.8993	0.0065	0.0442	0.0084	17.5603	0.2642	40.2852	0.2824	0			0.1922	98.5427	80.3541	73.3433	80.3541	66.3326		n/a
olv	PM	LAK02	ol8r	37.7054	0.0532	0.0746	0.0107	28.7839	0.4366	31.8086	0.3343	0			0.0604	99.2678	66.3326					n/a
olv	PM	LAK03	ol1c	39.2637	0.0083	0.0221	-0.0095	20.0568	0.2905	40.3403	0.263	-0.01			0.1421	100.387	78.1941	78.229	78.1941	78.264		n/a
olv	PM	LAK03	ol1r	39.1715	0.0105	0.0215	0.008	20.0341	0.2935	40.4605	0.278	-0.0092			0.1361	100.414	78.264					n/a
olv	PM	LAK03	ol2c	39.2868	0.0136	0.0382	0.0203	19.2068	0.3103	40.8069	0.2958	-0.0139			0.1244	100.103	79.1141	78.153	79.1141	85.3808		n/a
olv	PM	LAK03	ol2r	38.6613	-0.0004	0.0362	0.0067	20.9099	0.3017	39.6928	0.2761	-0.0166			0.1176	100.002	77.1919					n/a
olv	PM	LAK03	ol3c	39.9558	0.0012	0.0454	0.0292	13.9211	0.2251	45.6024	0.2817	-0.0101			0.2023	100.264	85.3808	85.3658	85.3808	85.3508		n/a
olv	PM	LAK03	ol3r	39.867	0.0043	0.0347	0.029	13.9319	0.2187	45.5285	0.2899	-0.0074			0.2144	100.118	85.3508					n/a
olv	PM	LAK03	ol4c	38.9719	0.0153	0.0152	-0.0017	20.8468	0.3029	40.0574	0.2749	-0.0251			0.1093	100.594	77.4053	77.4682	77.4053	77.5311		n/a
olv	PM	LAK03	ol4r	38.9081	0.0109	0.0193	0.0175	20.7276	0.2941	40.1163	0.2725	-0.0112			0.096	100.462	77.5311					n/a
olv	PM	LAK03	ol5c	38.7097	0.0081	0.0347	-0.0007	22.5632	0.3583	38.3362	0.28	-0.0231			0.1164	100.406	75.1813	75.1356	75.1813	75.0899		n/a
olv	PM	LAK03	ol5r	38.7188	0.0024	0.0331	-0.0083	22.6197	0.3271	38.2446	0.2736	-0.0195			0.1067	100.326	75.0899					n/a
olv	PM	LAK03	ol6c	40.3761	0.0109	0.042	0.0394	13.9586	0.2081	45.3623	0.2853	-0.0145			0.2117	100.494	85.281	85.261	85.281	85.2409		n/a
olv	PM	LAK03	ol6r	40.2601	0.002	0.0318	0.0326	13.9967	0.2045	45.3412	0.2897	-0.0171			0.2149	100.374	85.2409					n/a
olv	PM	LAK03	ol7c	38.9347	0.0039	0.034	0.0272	20.1369	0.2958	40.1874	0.2727	-0.0112			0.127	100.02	78.0611	78.0651	78.0611	78.069		n/a
olv	PM	LAK03	ol7r	39.0564	0.0078	0.0048	0.0136	20.2054	0.322	40.3429	0.2811	-0.0206			0.1433	100.377	78.069					n/a
olv	PM	LAK03	ol1c	40.9145	0.0022	0.0188	0.0811	13.2698	0.2156	43.9863	0.3028	0.0005			0.1635	98.9551	85.5279	85.4915	85.5279	85.4552		n/a
olv	PM	LAK03	ol1r	41.4335	0	0.056	0.0293	13.37	0.2265	44.0597	0.3003	0.0124			0.2472	99.7348	85.4552					n/a
olv	PM	LAK03	ol2c	40.8663	0.0024	0.0313	0.0282	14.5751	0.2083	43.1399	0.3086	0			0.1965	99.3565	84.0689	76.2935	84.0689	68.5182		n/a
olv	PM	LAK03	ol2r	38.4938	0.0109	0.0197	0.0106	26.886	0.3863	32.8209	0.2705	0			0.0992	98.998	68.5182					n/a
olv	PM	LAK03	ol3c	40.4214	0.0135	0.0625	0.0297	16.6811	0.2512	40.82	0.3036	0.0083			0.1799	98.7713	81.3532	71.2291	81.3532	61.1051		n/a
olv	PM	LAK03	ol3r	37.0012	0.0396	0.0243	0.0406	31.8614	0.4261	28.0755	0.3385	0			0.0526	97.8598	61.1051					n/a
olv	PM	LAK03	ol4c	39.6094	0.004	0.0276	0	17.1752	0.2531	40.109	0.2884	0			0.1645	97.6314	80.6334	72.4893	80.6334	64.3451		n/a
olv	PM	LAK03	ol4r	37.3422	0.0334	0.0358	0.018	29.796	0.4372	30.1601	0.2998	0			0.0616	98.1841	64.3451					n/a
olv	PM	LAK03	ol5c	40.6153	0	0.06	0.0456	14.2862	0.2462	42.4047	0.3003	0.0076			0.2103	98.1761	84.1068	75.6426	84.1068	67.1785		n/a
olv	PM	LAK03	ol5r	38.0382	0.0297	0.0485	0.001	27.7086	0.423	31.8101	0.2863	0			0.0606	98.406	67.1785					n/a
olv	PM	LAK03	ol6c	40.0479	0.0125	0.0385	0.0071	18.8392	0.2969	39.5705	0.2974	0.0005			0.1688	99.2792	78.9244	72.9559	78.9244	66.9875		n/a
olv	PM	LAK03	ol6r	37.8426	0.0434	0.0218	0.0086	27.8933	0.3846	31.7463	0.3065	0			0.1133	98.3605	66.9875					n/a
olv	PM	LAK03	ol7c	39.242	0.0129	0.0176	0.0387	21.9311	0.3464	36.7481	0.2749	0			0.1043	98.7161	74.9211	69.705	74.9211	64.4888		n/a
olv	PM	LAK03	ol7r	37.4772	0.0332	0.0405	0.0004	29.6297	0.3982	30.1804	0.3079	0			0.082	98.1496	64.4888					n/a
olv	PM	LAK03	ol8c	39.5141	0.0131	0.0176	0	20.2456	0.3209	38.3722	0.2836	0			0.0761	98.8432	77.1645	71.3502	77.1645	65.5359		n/a
olv	PM	LAK03	ol8r	37.4406	0.0299	0.0644	0	28.8102	0.4328	30.7282	0.3001	0			0.0943	97.9003	65.5359					n/a
olv	PM	LAK03	ol9c	40.5277	0.0005	0.0444	0.0307	13.9578	0.2018	42.6522	0.2973	0			0.1463	97.8588	84.4916	82.0356	84.4916	79.5796		n/a
olv	PM	LAK03	ol9r	39.6497	0.0048	0.0423	0.0596	18.2405	0.2523	39.8706	0.2898	0			0.197	98.6066	79.5796					n/a
olv	PM	LAK03	ol10c	40.9859	0.0021	0.03	0.0216	14.156	0.2029	43.6131	0.2956	0			0.2041	99.5113	84.5985	76.4054	84.5985	68.2124		n/a
olv	PM	LAK03	ol10r	38.0913	0.0246	0.0678	0	26.9786	0.354	32.4715	0.2819	0			0.0658	98.3355	68.2124					n/a
olv	PM	LAK03	ol11c	39.2383	0.0173	0.0376	0.0171	22.8324	0.3338	36.1801	0.271	0			0.0963	99.0239	73.8572	73.9249	73.8572	73.9926		n/a
olv	PM	LAK03	ol11r	39.061	0.0129	0.025	0.0158	22.4787	0.3326	35.8707	0.25	0			0.1355	98.1821	73.9926					n/a
olv	PM	LAK03	ol12c	39.357	0.0195	0.043	0.0337	19.1818	0.2965	38.616	0.2879	0.0017			0.1363	97.9733	78.2098	73.6689	78.2098	69.128		n/a
olv	PM	LAK03	ol12r	38.223	0.0253	0.0401	0.0167	26.3994	0.376	33.1559	0.2722	0			0.0858	98.5945	69.128					n/a
olv	PM	LAK03	ol13c	40.5238	0.0045	0.0429	0.0405	15.0638	0.2069	42.4212	0.2749	0			0.1951	98.7734	83.3908	80.5626	83.3908	77.7344		n/a
olv	PM	LAK03	ol13r	39.5032	0.0057	0.0658	0.0194	19.4294	0.2915	38.0467	0.2541	0			0.1461	97.762	77.7344					n/a
olv	PM	LAK03	ol14c	39.3232	0.0043	0.043	0.0428	17.9236	0.2658	39.0376	0.2729	0			0.1968	97.11	79.5212	71.9456	79.5212	64.37		n/a
olv	PM	LAK03	ol14r	37.1283	0.0371	0.0658	0.0228	29.7446	0.4326	30.1407	0.3164	0			0.0767	97.965	64.37					n/a
olv	TS	LAK04	ol1r	37.928	0.004	0.048	0.01	23.265	0.337	38.191	0.297	0.014			0.071	100.165	74.5334	74.4405	74.4914	74.5334		l
olv	TS	LAK04	ol1	37.488	0	0.051	0.013	23.442	0.367	38.064	0.28	0.01			0.101	99.816	74.3257					l
olv	TS	LAK04	ol1	38.107	0	0.056	0.011	23.381	0.345	38.136	0.286	0.007			0.109	100.438	74.4114					l
olv	TS	LAK04	ol1c	37.653	0	0.051	0.032	23.311	0.376	38.182	0.29	0.014			0.094	100.002	74.4914					l
olv	TS	LAK04	ol2r	37.509	0	0.044	0.026	27.471	0.385	34.726	0.275	0.003			0.091	100.53	69.266	73.1705	74.4795	69.266		l
olv	TS	LAK04	ol2	37.703	0	0.053	0.022	23.368	0.396	38.107	0.274	0.021			0.094	100.037	74.4075					l
olv	TS	LAK04	ol2	37.616	0	0.067	0.021	23.293	0.351	38.228	0.282	0.008			0.094	99.96	74.5289					l
olv	TS	LAK04	ol2c	38.046	0	0.03	0.026	23.336	0.352	38.199	0.276	0.013			0.118	100.394	74.4795					l
olv	TS	LAK04	ol3rGM	36.26	0.055	0.04	0.032	31.272	0.494	31.668	0.379	0.023			0.052	100.275	64.3552	64.34	64.3248	64.3552		l
olv	TS	LAK04	ol3cGM	36.26	0.018	0.045	0.011	31.348	0.466	31.703	0.355	0.019			0.056	100.282	64.3248					l
olv	PM	LAK04a	ol1c	40.0185	0.0126	0.0408	0.0373	13.9375	0.1952	46.007	0.2985	-0.0078			0.198	100.745	85.4761	85.4656	85.4761	85.4551		n/a
olv	PM	LAK04a	ol1r	40.3681	0.0058	0.0504	0.047	13.8618	0.2195	45.68	0.3026	-0.0085			0.2134	100.749	85.4551					n/a
olv	PM	LAK04a	ol2c	39.253	0.0097	0.0233	0.0076	19.9527	0.3142	40.9745	0.275	-0.0219			0.1262	100.936	78.5467	78.5284	78.5467	78.5102		n/a
olv	PM	LAK04a	ol2r	39.3631	-0.0007	0.0231	0.0144	19.898	0.2966	40.7738	0.2913	-0.0169			0.1152	100.775	78.5102					n/a
olv	PM	LAK04a	ol3c	40.1806	0.0057	0.0241	0.0363	14.3411	0.2051	45.6748	0.2857	-0.0153			0.1753	100.929	85.0261	84.9164	85.0261	84.8068		n/a
olv	PM	LAK04a	ol3r	40.2306	0.0089	0.0502	0.0316	14.4234	0.2121	45.1573	0.2897	-0.0121			0.1986	100.602	84.8068					n/a
olv	PM	LAK04a	ol4c	40.169	-0.0014	0.0588	0.0713	13.8408	0.2116	46.1169	0.2878	-0.017			0.215	100.971	85.5917	85.1642	85.5917	84.7367		n/a
olv	PM	LAK04a	ol4r	40.2901	0.0105	0.05	0.0434	14.5585	0.2357	45.3334	0.2878	-0.0113			0.2023	101.012	84.7367					n/a
olv	PM	LAK04a	ol5c	40.2322	-0.0011	0.0533	0.0558	13.7462	0.2232	45.5809	0.2988	-0.0038			0.2183	100.409	85.5321	80.5024	85.5321	75.4727		n/a
olv	PM	LAK04a	ol5r	38.6437	0.001	0.0291	0.0537	22.4963	0.2997	38.8267	0.263	-0.0136			0.1257	100.739	75.4727					n/a
olv	PM	LAK04a	ol6c	39.1123	0.0064	0.0326	-0.005	18.5995	0.2918	42.0831	0.2836	-0.0107			0.1641	100.573	80.1348	79.3942	80.1348	78.6536		n/a
olv	PM	LAK04a	ol6r	39.2	0.0124	0.0485	0.0148	19.8725	0.2787	41.07	0.2807	-0.0166			0.0914	100.869	78.6536					n/a
olv	PM	LAK04a	ol7c	40.1285	0.0034	0.0494	0.0326	13.7683	0.2059	45.865	0.3062	-0.0083			0.1988	100.558	85.589	85.7896	85.589	85.9902		n/a
olv	PM	LAK04a	ol7r	40.6431	0.0041	0.0478	0.0481	13.3513	0.1593	45.964	0.3016	-0.013			0.2314	100.751	85.9902					n/a
olv	PM	LAK04a	ol8c	37.7874	0.0198	0.0408	0.0066	25.8627	0.3711	36.3678	0.2603	-0.0379			0.0848	100.801	71.4861	71.0761	71.4861	70.6662		n/a
olv	PM	LAK04a	ol8r	37.907	0.0311	0.0424	-0.0102	26.3666	0.3956	35.6267	0.2801	0.0286			0.0682	100.746	70.6662					n/a
olv	PM	LAK04b	ol1c	41.139	0.0127	0.071	0.0232	14.2646	0.2079	45.3328	0.305	0			0.1949	101.551	84.9984	77.2998	84.9984	69.6011		n/a
olv	PM	LAK04b	ol1r	38.3391	0.0139	0.0497	0.0228	26.8353	0.3767	34.4622	0.2686	0			0.0893	100.458	69.6011					n/a
olv	PM	LAK04b	ol2c	41.073	0.0056	0.0571	0.0419	13.7878	0.1987	45.6785	0.3071	0			0.1876	101.337	85.5211	77.0952	85.5211	68.6694		n/a
olv	PM	LAK04b	ol2r	38.2688	0.006	0.0557	0.0259	27.5957	0.3938	33.9245	0.2865	0			0.0775	100.634	68.6694					n/a
olv	PM	LAK04b	ol3c	40.9781	0.0009	0.0284741	0.05	14.1409	0.194525	45.3287	0.301602	0			0.1723	101.195	85.108	80.6384	85.108	76.1687		n/a
olv	PM	LAK04b	ol3r	39.4757	0.0031	0.0541605	0.0272	21.6428	0.31724	38.7989	0.256787	0			0.1711	100.747	76.1687					n/a
olv	PM	LAK04c	ol1c	41.0012	0.0123	0.0434	0.0397	13.7174	0.2172	45.7725	0.2889	0			0.1976	101.29	85.6097	77.6412	85.6097	69.6727		n/a
olv	PM	LAK04c	ol1r	38.5804	0.013	0.0048	0	26.7279	0.3821	34.4407	0.2704	0			0.0689	100.488	69.6727					n/a
olv	PM	LAK04c	ol2c	40.178	0	0.0482	0.0257	18.1136	0.2712	41.8887	0.301	0			0.1034	100.93	80.4802	74.0682	80.4802	67.6562		n/a
olv	PM	LAK04c	ol2r	37.9874	0.0181	0.0314	0	28.3937	0.4439	33.3132	0.2984	0			0.0384	100.525	67.6562					n/a
olv	PM	LAK04c	ol3c	39.1975	0.004	0.0321	0	22.2164	0.3355	39.0044	0.2739	0			0.1002	101.164	75.7877	72.8168	75.7877	66.9053		n/a
olv	PM	LAK04c	ol3c	39.1287	0.0175	0.0219	0.006	22.1462	0.3587	38.8174	0.288	0			0.1029	100.887	75.7575					n/a
olv	PM	LAK04c	ol3r	37.4738	0.0313	0.0023	0.047	29.1878	0.4356	33.0965	0.3404	0			0.0706	100.685	66.9053					n/a
olv	PM	LAK04c	ol5c	39.1177	0.0166	0.0399	0.0428	22.6463	0.3774	38.6119	0.263	0.0008			0.098	101.214	75.2463	70.6011	75.2463	65.9559		n/a
olv	PM	LAK04c	ol5r	37.5975	0.0303	0	0.0306	29.8443	0.4153	32.4303	0.3196	0			0.0344	100.702	65.9559					n/a
olv	PM	LAK04c	ol6c	39.7596	0.0207	0.019	0.0066	19.5413	0.2998	40.8669	0.2829	0			0.0857	100.882	78.8519	73.5099	78.8519	68.1679		n/a
olv	PM	LAK04c	ol6r	38.0235	0.0226	0.0357	0.0106	28.0655	0.4292	33.7106	0.314	0			0.0858	100.698	68.1679					n/a
olv	PM	LAK04c	ol7c	39.6576	0.0092	0.0614	0.0425	19.5525	0.2912	41.0376	0.295	0			0.1423	101.089	78.9118	72.8495	78.9118	66.7872		n/a
olv	PM	LAK04c	ol7r	37.3896	0.0443	0.0426	0	29.3733	0.4153	33.1298	0.3158	0			0.0921	100.803	66.7872					n/a
olv	PM	LAK04c	ol8c	39.9965	0.0099	0.0309	0.0138	18.1176	0.2909	41.9532	0.2903	0.0115			0.1147	100.829	80.5009	74.1869	80.5009	67.8729		n/a
olv	PM	LAK04c	ol8r	37.5823	0.0167	0.0349	0.0215	28.0629	0.3765	33.2533	0.333	0			0.0692	99.7503	67.8729					n/a
olv	PM	LAK04d	ol1c	39.0625	0.0007	0.0464	0.0467	15.7052	0.2566	43.9594	0.3076	0.0073			0.1895	99.5819	83.3065	78.6827	83.3065	74.0589		n/a
olv	PM	LAK04d	ol1r	37.482	-0.0043	0.0269	0.0209	23.6386	0.2982	37.8521	0.2785	-0.0207			0.112	99.7093	74.0589					n/a
olv	PM	LAK04d	ol2c	37.7914	0.0331	0.0005	-0.0008	23.9991	0.3129	37.2161	0.2775	-0.0224			0.0632	99.6936	73.4379	73.024	73.4379	72.6102		n/a
olv	PM	LAK04d	ol2r	37.7035	0.011	0.0138	0.008	24.6992	0.3792	36.7256	0.2611	-0.0395			0.1076	99.9092	72.6102					n/a
olv	PM	LAK04d	ol3c	38.1136	0.0157	0.0234	0.0102	22.9999	0.3936	37.8751	0.2859	-0.0374			0.0805	99.7979	74.5932	71.7632	74.5932	68.9331		n/a
olv	PM	LAK04d	ol3r	37.3419	0.0422	0.0251	0.0172	27.4462	0.4083	34.1579	0.2902	-0.0356			0.095	99.824	68.9331					n/a
olv	PM	LAK04d	ol4c	39.4978	-0.0003	0.0331	0.0443	13.8993	0.1767	45.8318	0.2987	-0.0173			0.1999	99.9817	85.4628	78.8362	85.4628	72.2096		n/a
olv	PM	LAK04d	ol4r	36.9476	-0.0021	0.0179	0.0078	24.9262	0.3221	36.3274	0.2755	-0.0259			0.0889	98.9134	72.2096					n/a
olv	PM	LAK04d	ol5c	39.8472	0.003	0.0468	0.0517	13.6508	0.2315	46.1158	0.3195	-0.0177			0.2334	100.5	85.7611	82.4351	85.6159	76.0737		n/a
olv	PM	LAK04d	ol5c	40.1168	0.0004	0.0509	0.047	13.8423	0.1829	45.6729	0.3168	-0.0155			0.2503	100.48	85.4707					n/a
olv	PM	LAK04d	ol5r	37.7793	-0.002	0.0454	0.0326	21.9787	0.2834	39.1957	0.2749	-0.0347			0.1689	99.7589	76.0737					n/a
olv	TS	LAK05	ol3c	38.183	0	0.047	0.042	20.792	0.32	39.779	0.303	0.018			0.14	99.624	77.3293	77.3293	77.3293	77.3293		c
olv	TS	LAK05	ol2r	37.374	0	0.048	0.028	26.261	0.421	35.98	0.283	0.014			0.127	100.536	70.9531	74.8409	78.7286	70.9531		l
olv	TS	LAK05	ol2c	38.714	0	0.047	0.029	19.726	0.309	40.95	0.301	0.016			0.148	100.24	78.7286					l
olv	TS	LAK05	ol1rGM	35.98	0.027	0.035	0.015	31.524	0.495	30.986	0.373	0.02			0.081	99.536	63.6687	63.9118	64.1548	63.6687		c
olv	TS	LAK05	ol1cGM	36.354	0.023	0.026	0.012	31.295	0.463	31.416	0.323	0.008			0.063	99.982	64.1548					c
olv	TS	LAK05	ol4rGM	34.046	0.13	0.417	0.029	36.789	0.498	26.287	0.461	0.049			0.056	98.762	56.0232	59.9478	63.8724	56.0232		c
olv	TS	LAK05	ol4cGM	36.155	0.069	0.034	0.018	31.683	0.418	31.418	0.431	0.012			0.048	100.286	63.8724					c
olv	TS	LAK05	ol5rGM	36.059	0.078	0.078	0.029	31.307	0.463	30.922	0.426	0.004			0.054	99.419	63.7806	63.8844	63.9881	63.7806		c
olv	TS	LAK05	ol5cGM	36.326	0.071	0.04	0.026	31.397	0.473	31.291	0.409	0.006			0.078	100.118	63.9881					c
olv	TS	LAK06	ol1	36.573	0.019	0	0.011	29.272	0.448	33.378	0.348	0.043			0.077	100.17	67.029	69.203	70.8723	67.029	154.615	c
olv	TS	LAK06	ol1	37.038	0.003	0.06	0.015	28.862	0.407	33.692	0.318	0.019			0.08	100.493	67.5455				145.52	c
olv	TS	LAK06	ol1	37.041	0.013	0.036	0.022	28.928	0.428	33.85	0.304	0.015			0.077	100.713	67.598				136.425	c
olv	TS	LAK06	ol1	36.904	0.014	0.059	0.017	28.798	0.449	34.141	0.297	0.029			0.083	100.792	67.8835				127.33	c
olv	TS	LAK06	ol1	37.146	0.009	0.032	0.024	28.511	0.405	34.271	0.283	0.017			0.085	100.783	68.184				118.235	c
olv	TS	LAK06	ol1	37.137	0	0.021	0.026	28.301	0.413	34.486	0.288	0.028			0.097	100.797	68.4793				109.14	c
olv	TS	LAK06	ol1	37.027	0	0.052	0.011	27.978	0.421	34.518	0.283	0.013			0.083	100.385	68.7464				100.045	c
olv	TS	LAK06	ol1	37.086	0	0.06	0.037	27.563	0.393	34.944	0.273	0.025			0.088	100.469	69.3281				90.95	c
olv	TS	LAK06	ol1	37.158	0	0.057	0.03	27.319	0.394	35.12	0.273	0.025			0.105	100.48	69.6232				81.855	c
olv	TS	LAK06	ol1	37.277	0.006	0	0.018	27.381	0.404	35.271	0.274	0.013			0.088	100.732	69.666				72.76	c
olv	TS	LAK06	ol1	37.299	0	0.02	0.015	26.924	0.413	35.47	0.275	0.029			0.119	100.565	70.1384				63.665	c
olv	TS	LAK06	ol1	37.288	0.002	0.02	0.008	26.999	0.415	35.528	0.282	0.01			0.093	100.646	70.1144				54.57	c
olv	TS	LAK06	ol1	37.315	0.005	0.043	0.014	26.807	0.378	35.797	0.271	0.009			0.069	100.708	70.4211				45.475	c
olv	TS	LAK06	ol1	37.393	0.004	0	0.015	26.417	0.383	35.91	0.28	0.044			0.101	100.548	70.7906				18.19	c
olv	TS	LAK06	ol1	37.417	0.008	0.025	0.018	26.449	0.394	36.02	0.284	0.028			0.077	100.72	70.8288				9.095	c
olv	TS	LAK06	ol1c	37.371	0	0.03	0.029	26.411	0.396	36.044	0.277	0.013			0.078	100.65	70.8723				0	c
olv	TS	LAK06	ol3r	36.139	0.016	0.038	0.027	31.887	0.451	30.951	0.364	0.022			0.07	99.964	63.3773	65.7491	66.4706	63.3773	71.832	c
olv	TS	LAK06	ol3	36.261	0.004	0.033	0.018	30.557	0.413	32.078	0.341	0.027			0.061	99.792	65.1765				62.853	c
olv	TS	LAK06	ol3	36.618	0	0.03	0.016	30.184	0.418	32.502	0.311	0.009			0.049	100.138	65.751				53.874	c
olv	TS	LAK06	ol3	36.339	0.015	0.046	0.027	29.946	0.444	32.648	0.292	0.021			0.069	99.848	66.0297				44.895	c
olv	TS	LAK06	ol3	36.394	0.009	0.025	0.022	29.739	0.423	32.726	0.298	0.018			0.09	99.743	66.2385				35.916	c
olv	TS	LAK06	ol3	36.304	0	0.038	0.022	29.757	0.435	32.758	0.284	0.027			0.071	99.695	66.2468				26.937	c
olv	TS	LAK06	ol3	36.61	0.014	0.037	0.02	29.767	0.447	32.77	0.289	0.027			0.062	100.044	66.2475				17.958	c
olv	TS	LAK06	ol3	36.335	0.022	0.034	0.01	29.793	0.436	32.735	0.287	0.037			0.091	99.779	66.204				8.979	c
olv	TS	LAK06	ol3c	36.481	0.004	0.073	0.027	29.748	0.451	33.078	0.297	0.015			0.056	100.231	66.4706				0	c
olv	TS	LAK06	ol2r	35.535	0.027	0.056	0.026	30.012	0.407	32.682	0.375	0.033			0.04	99.194	66.0036	81.2533	85.1506	66.0036	261.986	l
olv	TS	LAK06	ol2	35.651	0.001	0.022	0.031	27.536	0.425	34.783	0.287	0.016			0.093	98.845	69.2506				252.952	l
olv	TS	LAK06	ol2	35.978	0.004	0.046	0.041	25.582	0.399	36.429	0.26	0.028			0.082	98.85	71.7421				243.918	l
olv	TS	LAK06	ol2	36.475	0.006	0.046	0.021	23.421	0.349	38.119	0.264	0.027			0.14	98.868	74.3704				234.884	l
olv	TS	LAK06	ol2	36.396	0.001	0.04	0.032	22.299	0.357	39.187	0.276	0.004			0.105	98.697	75.8053				225.85	l
olv	TS	LAK06	ol2	36.595	0.007	0.051	0.035	21.07	0.321	40.016	0.29	0.007			0.117	98.509	77.2003				216.816	l
olv	TS	LAK06	ol2	37.104	0	0.036	0.04	20.265	0.331	40.818	0.287	0.016			0.127	99.024	78.2187				207.782	l
olv	TS	LAK06	ol2	37.103	0	0.034	0.054	19.285	0.289	41.542	0.274	0.022			0.168	98.772	79.341				198.748	l
olv	TS	LAK06	ol2	36.902	0	0.051	0.04	18.412	0.277	42.114	0.267	0.021			0.179	98.262	80.3072				189.714	l
olv	TS	LAK06	ol2	37.062	0	0.049	0.034	17.727	0.271	42.672	0.281	0.009			0.213	98.319	81.1025				180.68	l
olv	TS	LAK06	ol2	37.372	0	0.026	0.03	17.362	0.247	43.093	0.285	0.02			0.175	98.61	81.5674				171.646	l
olv	TS	LAK06	ol2	37.419	0	0.046	0.052	16.788	0.266	43.556	0.285	0.011			0.184	98.607	82.2242				162.612	l
olv	TS	LAK06	ol2	37.394	0	0.049	0.029	16.349	0.235	43.85	0.287	0.014			0.202	98.408	82.7046				153.578	l
olv	TS	LAK06	ol2	37.526	0	0.028	0.059	15.946	0.24	44.13	0.284	0.024			0.15	98.387	83.1481				144.544	l
olv	TS	LAK06	ol2	37.576	0	0.069	0.042	15.544	0.223	44.5	0.296	0.016			0.186	98.452	83.6176				135.51	l
olv	TS	LAK06	ol2	37.69	0	0.015	0.045	15.201	0.238	44.637	0.282	0.015			0.187	98.31	83.9624				126.476	l
olv	TS	LAK06	ol2	37.579	0	0.038	0.055	15.103	0.229	44.949	0.295	0.021			0.199	98.468	84.1424				117.442	l
olv	TS	LAK06	ol2	37.958	0	0.051	0.063	14.919	0.229	44.98	0.297	0.018			0.183	98.697	84.3144				108.408	l
olv	TS	LAK06	ol2	37.713	0	0.054	0.044	14.788	0.211	45.062	0.302	0.015			0.185	98.374	84.4546				99.374	l
olv	TS	LAK06	ol2	37.814	0	0.047	0.044	14.747	0.234	45.214	0.3	0.008			0.211	98.621	84.5351				90.34	l
olv	TS	LAK06	ol2	38.105	0	0.039	0.065	14.591	0.238	45.223	0.298	0.015			0.208	98.783	84.6762				81.306	l
olv	TS	LAK06	ol2	38.045	0	0.054	0.058	14.573	0.228	45.31	0.294	0.008			0.212	98.782	84.7171				72.272	l
olv	TS	LAK06	ol2	38.052	0	0.038	0.049	14.467	0.218	45.367	0.297	0.005			0.184	98.678	84.8276				63.238	l
olv	TS	LAK06	ol2	38.291	0	0.044	0.051	14.381	0.222	45.344	0.297	0.016			0.188	98.834	84.8977				54.204	l
olv	TS	LAK06	ol2	38.091	0	0.047	0.061	14.263	0.204	45.432	0.29	0.012			0.208	98.609	85.0277				45.17	l
olv	TS	LAK06	ol2	37.985	0	0.047	0.044	14.36	0.253	45.528	0.302	0.018			0.217	98.754	84.9682				36.136	l
olv	TS	LAK06	ol2	37.936	0	0.048	0.047	14.248	0.231	45.541	0.296	0.017			0.212	98.577	85.0716				27.102	l
olv	TS	LAK06	ol2	37.8	0	0.044	0.044	14.246	0.238	45.636	0.31	0.014			0.2	98.53	85.0998				18.068	l
olv	TS	LAK06	ol2	37.885	0	0.029	0.03	14.148	0.204	45.497	0.294	0.015			0.183	98.285	85.1486				9.034	l
olv	TS	LAK06	ol2c	37.774	0	0.037	0.041	14.147	0.197	45.501	0.302	0.011			0.211	98.221	85.1506				0	l
olv	TS	LAK06	ol4r	36.244	0.04	0.037	0.013	30.426	0.427	32.463	0.342	0.008			0.064	100.062	65.5439	70.6148	71.7622	65.5439	159.53	l
olv	TS	LAK06	ol4	36.235	0.009	0.032	0.018	29.09	0.431	33.766	0.282	0.017			0.052	99.932	67.421				136.74	l
olv	TS	LAK06	ol4	36.651	0.002	0.026	0.034	28.495	0.419	34.348	0.282	0.011			0.072	100.34	68.2448				125.345	l
olv	TS	LAK06	ol4	36.709	0.003	0.048	0.016	27.703	0.386	35.028	0.27	0.028			0.098	100.286	69.2714				113.95	l
olv	TS	LAK06	ol4	36.921	0	0.033	0.004	26.853	0.403	35.561	0.274	0.004			0.075	100.128	70.2473				102.555	l
olv	TS	LAK06	ol4	37.017	0.015	0.044	0.017	26.1	0.402	36.103	0.273	0.019			0.093	100.083	71.1498				91.16	l
olv	TS	LAK06	ol4	37.091	0.006	0.039	0.017	25.786	0.378	36.467	0.275	0.009			0.1	100.168	71.602				79.765	l
olv	TS	LAK06	ol4	37.142	0.008	0.038	0.018	25.588	0.366	36.793	0.273	0.013			0.088	100.327	71.9385				68.37	l
olv	TS	LAK06	ol4	36.96	0.01	0.037	0.012	25.318	0.397	36.899	0.271	0.01			0.084	99.998	72.2099				56.975	l
olv	TS	LAK06	ol4	37.059	0.007	0.037	0.015	25.112	0.371	37.021	0.269	0.024			0.101	100.016	72.4395				45.58	l
olv	TS	LAK06	ol4	36.833	0.003	0.028	0.018	25.168	0.38	37.032	0.272	0.012			0.093	99.839	72.401				34.185	l
olv	TS	LAK06	ol4	37.198	0.006	0.028	0.023	25.266	0.381	36.933	0.273	0.011			0.085	100.204	72.2696				22.79	l
olv	TS	LAK06	ol4	37.248	0.005	0.05	0	25.362	0.405	36.772	0.276	0.015			0.089	100.222	72.1058				11.395	l
olv	TS	LAK06	ol4c	37.304	0	0.036	0.025	25.664	0.387	36.582	0.269	0.02			0.079	100.367	71.7622				0	l
olv	PM	LAK06	ol1c	39.9861	0.0144	0.0381	0.0107	15.1702	0.1971	44.1948	0.2965	0			0.1814	100.089	83.8553	78.6963	83.8553	73.5372		n/a
olv	PM	LAK06	ol1r	38.0124	0.0142	0.078	0.0064	23.9554	0.3377	37.3382	0.2628	0			0.1223	100.127	73.5372					n/a
olv	PM	LAK06	ol2c	39.8731	0.0087	0.0301	0.0358	14.2219	0.2167	45.8526	0.307	0			0.2346	100.781	85.1811	85.3315	85.1811	85.4818		n/a
olv	PM	LAK06	ol2r	40.0647	0.006	0.0669	0.0284	13.8745	0.2165	45.8202	0.2893	0			0.1765	100.543	85.4818					n/a
olv	PM	LAK06	ol3c	39.8528	0.0097	0.0627	0.0078	16.3331	0.2283	43.436	0.2964	0			0.214	100.441	82.5825	78.3391	82.5825	74.0956		n/a
olv	PM	LAK06	ol3r	38.4786	0.0044	0.0709	0.0267	23.3393	0.329	37.4442	0.2551	0			0.1165	100.065	74.0956					n/a
olv	PM	LAK06	ol4c	38.0124	0.0192	0.0277	0.0143	25.188	0.3703	36.2005	0.2745	0			0.1095	100.216	71.9288	70.3916	71.9288	68.8545		n/a
olv	PM	LAK06	ol4r	37.6256	0.0651	0.0181	0	26.9407	0.4114	33.4059	0.3196	0			0.0595	98.846	68.8545					n/a
olv	PM	LAK06	ol5c	38.5044	0.0131	0.0576	0	22.6014	0.3388	38.2915	0.2884	0			0.087	100.182	75.1279	75.1319	75.1279	75.1359		n/a
olv	PM	LAK06	ol5r	38.384	0.0084	0.0462	0.027	22.5919	0.2958	38.2917	0.2772	0			0.0922	100.014	75.1359					n/a
olv	PM	LAK10	ol1c	39.3153	0.0022	0.0483	0.0385	15.8872	0.2529	43.9351	0.2958	-0.0162			0.186	99.9613	83.1379	82.4636	83.1379	81.7894		n/a
olv	PM	LAK10	ol1r	38.9784	0.0049	0.0267	0.0171	17.1309	0.2605	43.1549	0.2818	-0.0166			0.2044	100.059	81.7894					n/a
olv	PM	LAK10	ol2c	39.2168	0.0115	0.036	0.0058	19.778	0.3038	40.8804	0.2797	-0.023			0.134	100.646	78.6559	78.2011	78.6559	77.7463		n/a
olv	PM	LAK10	ol2r	38.9777	0.0077	0.0356	0.0117	20.5322	0.3165	40.2339	0.2841	-0.0237			0.1153	100.515	77.7463					n/a
olv	PM	LAK10	ol3c	39.4171	0.0002	0.0353	0.0329	15.8723	0.2258	44.2451	0.2862	-0.0143			0.1645	100.279	83.2493	83.2646	83.2493	83.28		n/a
olv	PM	LAK10	ol3r	39.4747	0.0071	0.0437	0.0179	15.7746	0.2489	44.0698	0.2988	-0.0123			0.1958	100.131	83.28					n/a
olv	PM	LAK10	ol4c	37.9209	0.0046	0.0415	0.0027	22.7741	0.3151	38.3724	0.2765	-0.0149			0.1047	99.8125	75.025	75.1374	75.025	75.2499		n/a
olv	PM	LAK10	ol4r	38.2991	0.0226	0.016	0.013	22.5666	0.3626	38.4834	0.2686	-0.0184			0.0599	100.092	75.2499					n/a
olv	PM	LAK10	ol5c	39.2554	0.0104	0.0358	0.0402	15.7137	0.2679	44.3175	0.3051	-0.0178			0.2054	100.151	83.4115	83.2035	83.4115	82.9955		n/a
olv	PM	LAK10	ol5r	39.3946	0.0125	0.0369	0.034	16.0563	0.2225	43.9557	0.2899	-0.0222			0.1653	100.168	82.9955					n/a
olv	PM	LAK10	ol1c	40.1668	0.0088	0.0524	0.0453	13.8156	0.1912	45.82	0.2905	0.0001			0.1857	100.576	85.5345	82.4207	85.5345	79.3068		n/a
olv	PM	LAK10	ol1r	39.7606	0.0017	0.0313	0.0362	18.9083	0.2453	40.6457	0.2784	0			0.1304	100.038	79.3068					n/a
olv	PM	LAK10	ol2c	39.4564	0.0118	0.0657	0.0469	13.8158	0.2365	45.9557	0.3001	0			0.2233	100.112	85.5708	80.3609	85.5708	75.151		n/a
olv	PM	LAK10	ol2r	37.931	0.0137	0.0416	0.0321	22.8069	0.3159	38.6874	0.2582	0			0.1187	100.206	75.151					n/a
olv	PM	LAK10	ol3c	38.3784	0.0055	0.0294	0	22.2563	0.312	38.2471	0.2843	0			0.0814	99.5944	75.3928	75.289	75.3928	75.1852		n/a
olv	PM	LAK10	ol3r	38.7846	0.0143	0.0485	0.0127	22.4472	0.3207	38.1471	0.2738	0			0.0741	100.123	75.1852					n/a
olv	PM	LAK10	ol4c	40.4	0.0117	0.0603	0.0356	13.4818	0.2135	45.5078	0.2978	0.0082			0.2226	100.239	85.7511	84.2841	85.7511	82.8171		n/a
olv	PM	LAK10	ol4r	39.7886	0.008	0.0527	0.0645	16.0435	0.2329	43.371	0.2791	0			0.2349	100.075	82.8171					n/a
olv	PM	LAK10	ol5c	40.1065	0.0035	0.053	0.0166	13.5661	0.2059	45.8258	0.3037	0			0.2403	100.321	85.7601	85.1555	85.7601	84.5509		n/a
olv	PM	LAK10	ol5r	40.0175	0.0063	0.072	0.0439	14.5759	0.2115	44.7433	0.3016	0			0.2464	100.218	84.5509					n/a
olv	TS	LAK11	ol1r	36.132	0.055	0.051	0.015	31.405	0.454	31.501	0.375	0.032			0.093	100.113	64.1362	66.4842	68.8321	64.1362		c
olv	TS	LAK11	ol1c	36.892	0	0.018	0	27.936	0.42	34.604	0.278	0.056			0.079	100.282	68.8321					c
olv	TS	LAK11	ol3r	36.402	0.011	0.04	0.012	28.74	0.437	33.69	0.297	0.012			0.061	99.702	67.637	73.0091	73.6285	67.637		l
olv	TS	LAK11	ol3	37.2	0	0.049	0.009	25.783	0.386	36.263	0.27	0.014			0.079	100.052	71.4902					l
olv	TS	LAK11	ol3	36.888	0.003	0.029	0.034	24.451	0.385	37.344	0.276	0.011			0.067	99.488	73.1399					l
olv	TS	LAK11	ol3	37.045	0	0.021	0.034	23.992	0.366	37.579	0.283	0.021			0.084	99.426	73.6325					l
olv	TS	LAK11	ol3	37.177	0.001	0.046	0.014	24.075	0.377	37.667	0.276	0.019			0.071	99.721	73.6109					l
olv	TS	LAK11	ol3	37.168	0	0.024	0.026	23.819	0.432	37.626	0.286	0.021			0.06	99.462	73.7969					l
olv	TS	LAK11	ol3	36.732	0.005	0.065	0.021	24.005	0.387	37.669	0.273	0.001			0.081	99.239	73.6684					l
olv	TS	LAK11	ol3	37.052	0.001	0.047	0.017	23.977	0.366	37.635	0.276	0.019			0.078	99.467	73.6735					l
olv	TS	LAK11	ol3	37.01	0	0.035	0.009	24.1	0.406	37.66	0.283	0.018			0.059	99.58	73.5871					l
olv	TS	LAK11	ol3	37.16	0.002	0.051	0.019	24.134	0.392	37.61	0.272	0.011			0.078	99.728	73.5338					l
olv	TS	LAK11	ol3	36.693	0.003	0.105	0.012	23.894	0.357	37.246	0.273	0.022			0.059	98.664	73.539					l
olv	TS	LAK11	ol3	36.334	0	0.049	0.022	24.045	0.371	37.64	0.288	0.026			0.072	98.848	73.6211					l
olv	TS	LAK11	ol3	36.81	0	0.031	0.029	24.016	0.388	37.493	0.281	0.014			0.062	99.123	73.5686					l
olv	TS	LAK11	ol3c	36.761	0	0.04	0.01	24.002	0.393	37.587	0.278	0.003			0.092	99.165	73.6285					l
olv	TS	LAK11	ol5r	36.413	0.019	0.058	0.016	27.499	0.425	34.969	0.295	0.02			0.095	99.809	69.3927	71.1948	71.9326	69.3927		l
olv	TS	LAK11	ol5	37.033	0.008	0.04	0.017	25.308	0.389	36.975	0.285	0.029			0.08	100.164	72.2591					l
olv	TS	LAK11	ol5c	36.785	0.012	0.036	0.003	25.585	0.39	36.778	0.283	0.012			0.087	99.97	71.9326					l
olv	TS	LAK11	ol2rGM	36.139	0.043	0.044	0.021	31.128	0.439	31.61	0.367	0.009			0.06	99.858	64.419	64.673	64.9271	64.419		l
olv	TS	LAK11	ol2cGM	36.586	0.018	0.022	0.008	30.922	0.471	32.107	0.353	0.012			0.07	100.569	64.9271					l
olv	TS	LAK11	ol4rGM	36.536	0.038	0.043	0.033	26.818	0.404	35.7	0.311	0.015			0.099	99.997	70.356	71.2127	72.0694	70.356		l
olv	TS	LAK11	ol4cGM	36.935	0.02	0.044	0.01	25.508	0.414	36.917	0.295	0.011			0.061	100.214	72.0694					l
olv	TS	LAK11	ol6rGM	36.033	0.016	0.029	0.035	30.991	0.481	32.018	0.345	0.049			0.069	100.067	64.813	64.8818	64.9506	64.813		l
olv	TS	LAK11	ol6cGM	35.895	0.012	0.053	0.017	30.893	0.466	32.11	0.315	0.009			0.047	99.816	64.9506					l
olv	TS	LAK12	ol1r	37.007	0.03	0.031	0.022	30.584	0.461	32.03	0.355	0.016			0.07	100.607	65.1224	69.0383	71.1754	65.1224	75.474	c
olv	TS	LAK12	ol1	36.391	0.021	0.066	0.022	28.875	0.421	32.839	0.32	0.017			0.08	99.053	66.9709				62.895	c
olv	TS	LAK12	ol1	36.873	0.026	0.083	0.017	27.906	0.418	34.512	0.308	0.002			0.112	100.257	68.798				50.316	c
olv	TS	LAK12	ol1	37.368	0.022	0.053	0.025	26.958	0.429	35.265	0.277	0.024			0.069	100.49	69.9904				37.737	c
olv	TS	LAK12	ol1	37.676	0.011	0.036	0	26.641	0.373	35.369	0.279	0.013			0.08	100.478	70.2998				25.158	c
olv	TS	LAK12	ol1	37.363	0	0.036	0.018	26.257	0.407	35.902	0.275	0.007			0.094	100.359	70.9115				12.579	c
olv	TS	LAK12	ol1c	37.435	0.007	0.05	0.02	26.04	0.361	36.065	0.277	0.007			0.096	100.359	71.1754				0	c
olv	TS	LAK12	ol2r	37.041	0	0.04	0.026	28.575	0.419	33.96	0.274	0.005			0.098	100.438	67.937	74.1126	75.9876	67.937	129.836	c
olv	TS	LAK12	ol2	37.541	0	0.037	0.022	26.258	0.359	35.819	0.261	0.009			0.08	100.387	70.8629				120.562	c
olv	TS	LAK12	ol2	37.679	0	0.035	0.016	25.524	0.373	36.458	0.282	0.017			0.08	100.462	71.8042				111.288	c
olv	TS	LAK12	ol2	37.894	0	0.042	0.015	24.323	0.362	37.395	0.277	0.01			0.103	100.421	73.2696				102.014	c
olv	TS	LAK12	ol2	37.918	0	0.042	0.014	24.166	0.36	37.593	0.277	0.024			0.124	100.519	73.4992				92.74	c
olv	TS	LAK12	ol2	38.041	0	0.05	0.024	23.456	0.342	38.11	0.288	0.01			0.112	100.432	74.3374				83.466	c
olv	TS	LAK12	ol2	38.023	0	0.033	0.033	23.21	0.343	38.313	0.286	0.012			0.088	100.34	74.6387				74.192	c
olv	TS	LAK12	ol2	38.281	0	0.043	0.012	22.763	0.342	38.532	0.292	0.007			0.125	100.396	75.1118				64.918	c
olv	TS	LAK12	ol2	38.082	0.002	0.04	0.021	22.704	0.381	38.652	0.289	0.009			0.096	100.277	75.2183				55.644	c
olv	TS	LAK12	ol2	38.131	0	0.053	0.021	22.447	0.348	38.792	0.3	0.007			0.119	100.218	75.4968				46.37	c
olv	TS	LAK12	ol2	38.286	0	0.052	0.029	22.164	0.335	38.912	0.295	0.028			0.125	100.226	75.7875				37.096	c
olv	TS	LAK12	ol2	38.451	0	0.033	0.038	22.098	0.323	38.964	0.294	0.004			0.114	100.319	75.8666				27.822	c
olv	TS	LAK12	ol2	38.277	0	0.043	0.017	22.025	0.335	39.067	0.293	0.012			0.115	100.185	75.9754				18.548	c
olv	TS	LAK12	ol2	38.424	0.003	0.025	0.001	22.178	0.359	39.169	0.288	0.013			0.112	100.572	75.8965				9.274	c
olv	TS	LAK12	ol2c	38.41	0	0.054	0.027	22.053	0.333	39.143	0.298	0.007			0.101	100.426	75.9876				0	c
olv	TS	LAK12	ol3r	36.806	0	0.036	0	30.761	0.439	32.029	0.279	0.019			0.094	100.462	64.9905	71.86	74.7298	64.9905	118.998	c
olv	TS	LAK12	ol3	37.106	0	0.022	0.015	28.667	0.41	34.066	0.273	0.007			0.084	100.649	67.9349				105.776	c
olv	TS	LAK12	ol3	37.506	0	0.02	0.015	26.68	0.405	35.503	0.281	0.013			0.084	100.506	70.3482				92.554	c
olv	TS	LAK12	ol3	37.494	0	0.052	0.04	25.707	0.367	36.286	0.273	0.021			0.093	100.333	71.5632				79.332	c
olv	TS	LAK12	ol3	37.799	0	0.051	0.027	25.063	0.361	37.007	0.281	0.017			0.097	100.703	72.4709				66.11	c
olv	TS	LAK12	ol3	38.018	0	0.031	0.003	24.13	0.334	37.469	0.282	0.011			0.09	100.368	73.4639				52.888	c
olv	TS	LAK12	ol3	37.962	0	0.033	0.026	23.693	0.369	37.907	0.285	0.013			0.11	100.397	74.0426				39.666	c
olv	TS	LAK12	ol3	37.991	0	0.053	0.045	23.396	0.355	38.281	0.282	0.012			0.102	100.516	74.4714				26.444	c
olv	TS	LAK12	ol3	38.173	0	0.039	0.036	23.305	0.358	38.359	0.284	0.002			0.107	100.663	74.5841				13.222	c
olv	TS	LAK12	ol3c	37.891	0.001	0.047	0.022	23.143	0.378	38.387	0.291	0			0.097	100.256	74.7298				0	c
olv	TS	LAK12	ol4r	37.648	0	0.047	0.022	23.797	0.353	37.607	0.273	0.002			0.083	99.832	73.805	74.2771	74.5845	73.805	147.364	c
olv	TS	LAK12	ol4	37.544	0.005	0.036	0.028	23.697	0.375	37.738	0.271	0.019			0.1	99.813	73.9534				136.838	c
olv	TS	LAK12	ol4	37.489	0.009	0.041	0.033	23.856	0.357	37.782	0.279	0.009			0.092	99.948	73.8469				126.312	c
olv	TS	LAK12	ol4	37.552	0	0.027	0.007	23.77	0.393	37.856	0.273	0.016			0.108	100.002	73.9543				115.786	c
olv	TS	LAK12	ol4	37.593	0	0.05	0.003	23.657	0.376	37.862	0.266	0.012			0.103	99.923	74.049				105.26	c
olv	TS	LAK12	ol4	37.832	0	0.052	0.034	23.555	0.345	38.002	0.277	0.013			0.117	100.227	74.2027				94.734	c
olv	TS	LAK12	ol4	37.592	0	0.028	0.012	23.438	0.355	37.951	0.281	0			0.115	99.771	74.2722				84.208	c
olv	TS	LAK12	ol4	37.763	0	0.037	0.033	23.429	0.36	38.055	0.27	0.02			0.118	100.086	74.3318				73.682	c
olv	TS	LAK12	ol4	37.798	0	0.023	0.027	23.294	0.365	38.146	0.274	0.024			0.084	100.035	74.4873				63.156	c
olv	TS	LAK12	ol4	37.889	0.001	0.048	0.015	23.352	0.376	38.163	0.269	0.009			0.102	100.224	74.4485				52.63	c
olv	TS	LAK12	ol4	37.735	0	0.044	0.027	23.345	0.349	38.275	0.27	0.006			0.112	100.162	74.5099				42.104	c
olv	TS	LAK12	ol4	37.644	0	0.053	0.021	23.214	0.385	38.28	0.273	0.007			0.099	99.976	74.6191				31.578	c
olv	TS	LAK12	ol4	37.831	0	0.041	0.022	23.348	0.35	38.222	0.279	0.011			0.094	100.199	74.4812				21.052	c
olv	TS	LAK12	ol4	37.766	0	0.02	0.004	23.247	0.349	38.318	0.281	0.018			0.102	100.106	74.611				10.526	c
olv	TS	LAK12	ol4c	37.682	0.003	0.041	0.026	23.248	0.339	38.266	0.281	0.006			0.11	100.003	74.5845				0	c
olv	TS	LAK12	ol5r	36.634	0	0.021	0.001	29.627	0.416	33.049	0.27	0.014			0.066	100.097	66.5418	73.5443	74.9177	66.5418	166.768	c
olv	TS	LAK12	ol5	37.224	0.001	0.041	0.013	26.542	0.382	35.613	0.275	0.023			0.083	100.197	70.5206				154.856	c
olv	TS	LAK12	ol5	37.579	0	0.038	0.032	24.948	0.366	36.925	0.264	0.007			0.116	100.275	72.5184				142.944	c
olv	TS	LAK12	ol5	37.654	0	0.026	0.02	24.261	0.398	37.424	0.279	0.017			0.085	100.162	73.3347				131.032	c
olv	TS	LAK12	ol5	37.757	0	0.034	0.024	23.782	0.38	37.817	0.263	0.005			0.083	100.144	73.9247				119.12	c
olv	TS	LAK12	ol5	37.86	0	0.047	0.035	23.455	0.36	37.998	0.275	0.016			0.093	100.138	74.282				107.208	c
olv	TS	LAK12	ol5	38.056	0.002	0.05	0.013	23.277	0.344	38.284	0.281	0.028			0.093	100.428	74.5697				83.384	c
olv	TS	LAK12	ol5	38.174	0.001	0.033	0.003	23.12	0.351	38.22	0.285	0.012			0.086	100.285	74.6662				71.472	c
olv	TS	LAK12	ol5	38.146	0.012	0.022	0.024	23.003	0.35	38.33	0.274	0.011			0.084	100.256	74.8163				59.56	c
olv	TS	LAK12	ol5	38.056	0	0.017	0.023	22.979	0.391	38.454	0.278	0.012			0.097	100.305	74.8967				47.648	c
olv	TS	LAK12	ol5	38.073	0	0.04	0.014	22.883	0.393	38.337	0.278	0.012			0.104	100.135	74.9181				35.736	c
olv	TS	LAK12	ol5	38.28	0	0.029	0.04	22.981	0.369	38.3	0.285	0.024			0.088	100.396	74.8195				23.824	c
olv	TS	LAK12	ol5	38.169	0	0.052	0.027	22.956	0.355	38.408	0.29	0.006			0.108	100.372	74.893				11.912	c
olv	TS	LAK12	ol5c	38.229	0	0.048	0.012	22.877	0.37	38.326	0.275	0.012			0.091	100.239	74.9177				0	c
olv	PM	LAK12a	ol1c	38.3209	0.0162	0.0291	0.0122	23.1767	0.3678	37.9345	0.2761	0			0.0957	100.229	74.4776	74.4218	74.4776	74.3659		n/a
olv	PM	LAK12a	ol1r	38.7523	0.0131	0.0219	0.0149	23.3319	0.3667	37.9651	0.2743	0			0.0742	100.814	74.3659					n/a
olv	PM	LAK12a	ol2c	39.6716	0.0018	0.0184	0.0064	18.5301	0.3045	41.9552	0.2944	0			0.111	100.893	80.1459	74.9954	80.1459	69.8449		n/a
olv	PM	LAK12a	ol2r	38.2269	0.0199	0.0418	0.0447	27.0002	0.3954	35.0768	0.2416	0			0.0879	101.135	69.8449					n/a
olv	PM	LAK12b	ol1c	39.1101	0.0077	0.0794	0.0213	20.3871	0.2958	40.5652	0.2859	0.0031			0.0866	100.842	78.0098	73.7018	78.0098	69.3938		n/a
olv	PM	LAK12b	ol1r	37.2893	0.0116	0.0261	0	27.3942	0.3902	34.8376	0.2551	0			0.064	100.268	69.3938					n/a
olv	PM	LAK12b	ol2c	38.4283	0.0088	0.005	0.0312	22.4897	0.337	38.5451	0.2695	0			0.0819	100.196	75.3432	71.4323	75.3432	67.5215		n/a
olv	PM	LAK12b	ol2r	37.1666	0.0148	0.0536	0.0013	28.8163	0.4077	33.6018	0.2434	0			0.0532	100.359	67.5215					n/a
olv	PM	LAK12b	ol3c	38.1219	0.0141	0.0041	0	21.1652	0.3097	40.081	0.2905	0			0.0997	100.086	77.1495	75.16	77.1495	73.1704		n/a
olv	PM	LAK12b	ol3r	37.7803	0.0125	0.0331	0	24.2689	0.3478	37.1236	0.2558	0			0.1035	99.9255	73.1704					n/a
olv	PM	LAK12b	ol4c	39.0785	0.0142	0.0215	0.0264	19.7168	0.2946	40.462	0.2985	0.0014			0.1125	100.026	78.535	76.0332	78.535	73.5313		n/a
olv	PM	LAK12b	ol4r	37.7922	0	0.0342	0.0124	24.0863	0.3575	37.5308	0.2805	0			0.0905	100.184	73.5313					n/a
olv	PM	LAK12b	ol5c	39.2736	0.0071	0.0667	0	18.7989	0.2872	41.1307	0.2984	0.041			0.1536	100.057	79.5952	79.3221	79.5952	79.0489		n/a
olv	PM	LAK12b	ol5r	39.3758	0.0164	0.0612	0.0082	19.4265	0.28	41.1113	0.2918	0.0529			0.1024	100.727	79.0489					n/a
olv	PM	LAK12b	ol6c	38.0065	0.0099	0.0279	0.0304	22.9197	0.3585	38.3705	0.2729	0			0.0763	100.073	74.9044	75.0754	74.9044	75.2465		n/a
olv	PM	LAK12b	ol6r	38.5034	0.0206	0.0568	0.0366	22.6571	0.344	38.6306	0.2719	0			0.0783	100.599	75.2465					n/a
olv	PM	LAK12b	ol7c	39.7177	0.0006	0.0626	0.0735	15.2395	0.2304	44.6733	0.2887	0.0081			0.1528	100.447	83.9392	77.1959	83.9392	70.4525		n/a
olv	PM	LAK12b	ol7r	37.715	0.0196	0.0076	0	26.2814	0.353	35.1481	0.2543	0.0012			0.0753	99.8554	70.4525					n/a
olv	PM	LAK12b	ol8c	40.08	0.0066	0.0215	0.0576	13.6657	0.1975	45.9159	0.3219	0.0176			0.2243	100.508	85.6946	85.6643	85.6946	85.634		n/a
olv	PM	LAK12b	ol8r	40.407	0	0.0592	0.0404	13.5532	0.213	45.3138	0.3031	0.0078			0.1887	100.086	85.634					n/a
olv	PM	LAK12b	ol9c	38.8226	0.0151	0.0263	0.0087	20.2436	0.3072	39.8815	0.2827	0.0057			0.1169	99.7103	77.8389	72.8377	77.8389	67.8365		n/a
olv	PM	LAK12b	ol9r	37.0654	0.0171	0.0658	0.0027	28.2985	0.3903	33.4766	0.2486	0			0.0554	99.6204	67.8365					n/a
olv	PM	LAK12b	ol10c	40.0189	0.007	0.0609	0.029	15.2211	0.2099	44.4444	0.2895	0			0.1999	100.481	83.8862	78.8272	83.8862	73.7682		n/a
olv	PM	LAK12b	ol10r	38.2304	0.0083	0.0065	0.0414	23.5112	0.3131	37.0847	0.2653	0			0.0942	99.555	73.7682					n/a
olv	PM	LAK12b	ol11c	39.3141	0.014	0.0339	0	19.407	0.2796	40.6033	0.2794	0			0.1304	100.062	78.859	78.8558	78.859	78.8527		n/a
olv	PM	LAK12b	ol11r	38.9552	0.0149	0.048	0.0179	19.3337	0.2875	40.4347	0.2808	0			0.1102	99.4829	78.8527					n/a
olv	PM	LAK12b	ol12c	38.9014	0.0097	0.0015	0.0159	20.3433	0.2842	39.9902	0.2983	0			0.1005	99.9449	77.8011	77.6465	77.8011	77.4919		n/a
olv	PM	LAK12b	ol12r	39.1428	0.0166	0.0265	0.0426	20.5404	0.309	39.6647	0.2823	0			0.093	100.118	77.4919					n/a
olv	PM	LAK12b	ol13c	38.4581	0.0142	0.018	0.0416	20.1122	0.2709	40.8964	0.2918	0			0.1174	100.221	78.3799	74.2628	78.3799	70.1457		n/a
olv	PM	LAK12b	ol13r	37.5902	0.0162	0.0156	0	26.6466	0.3923	35.1168	0.2563	0			0.0832	100.117	70.1457					n/a
olv	PM	LAK14	ol1c	38.9633	0.0081	0.0239	0.0366	22.6257	0.3466	38.6629	0.2681	0			0.0865	101.022	75.2878	75.4164	75.2878	75.545		n/a
olv	PM	LAK14	ol1r	38.9313	0.0127	0.0134	0.0334	22.3056	0.3619	38.6483	0.2675	0			0.0887	100.663	75.545					n/a
olv	PM	LAK14	ol2c	39.1434	0.0123	0.043	0.0137	22.9653	0.3611	38.1708	0.2726	0			0.0574	101.04	74.7687	73.9414	74.7687	73.1141		n/a
olv	PM	LAK14	ol2r	38.5079	0.0185	0.0577	0	24.2332	0.335	36.9628	0.2734	0			0.067	100.456	73.1141					n/a
olv	PM	LAK15	ol1c	40.2121	0.0015	0.041	0.0405	14.0509	0.1886	45.7725	0.2901	-0.0139			0.2306	100.828	85.3113	84.9762	85.3113	84.6411		n/a
olv	PM	LAK15	ol1r	39.8736	0.0177	0.0279	0.0449	14.5747	0.2023	45.0505	0.2922	-0.0065			0.2049	100.289	84.6411					n/a
olv	PM	LAK15	ol2c	39.8386	0.0031	0.0481	0.0292	13.8271	0.2072	45.8696	0.2813	-0.0035			0.2347	100.339	85.5376	85.4499	85.5376	85.3623		n/a
olv	PM	LAK15	ol2r	39.7908	0.0071	0.0348	0.0408	13.9866	0.1949	45.7492	0.2911	-0.0176			0.2381	100.333	85.3623					n/a
olv	PM	LAK15	ol3c	40.4023	0.0093	0.0404	0.0349	13.9035	0.1972	45.6688	0.2818	-0.0156			0.217	100.755	85.4147	85.4473	85.4147	85.48		n/a
olv	PM	LAK15	ol3r	40.1052	0.0164	0.0415	0.0395	13.8595	0.2123	45.7639	0.2921	-0.0094			0.2372	100.568	85.48					n/a
olv	PM	LAK15	ol4c	38.6047	0.0136	0.0223	0.0279	21.4811	0.2978	39.7681	0.2769	-0.0205			0.0884	100.581	76.7477	76.0581	76.7477	75.3684		n/a
olv	PM	LAK15	ol4r	38.4584	0.0155	0.018	0.0193	22.5656	0.3288	38.7277	0.2764	-0.0197			0.0756	100.485	75.3684					n/a
olv	PM	LAK15	ol5c	39.8361	0.0083	0.0296	0.0549	13.973	0.1957	45.8956	0.2923	-0.0134			0.2401	100.525	85.4143	85.3878	85.4143	85.3613		n/a
olv	PM	LAK15	ol5r	39.9401	0.0103	0.0472	0.0388	13.9863	0.1951	45.7444	0.2745	-0.0136			0.2354	100.472	85.3613					n/a
olv	PM	LAK15	ol6c	39.5186	0.0021	0.0179	0.0139	14.2569	0.2148	45.7763	0.3087	-0.0072			0.1895	100.299	85.129	85.1701	85.129	85.2112		n/a
olv	PM	LAK15	ol6r	40.1176	-0.0001	0.019	0.0756	14.0943	0.2394	45.5498	0.3093	-0.0117			0.2159	100.621	85.2112					n/a
olv	PM	LAK15	ol7c	38.3292	0.026	0.0226	-0.0069	23.596	0.3645	37.9256	0.2634	-0.0289			0.0899	100.617	74.1308	74.2422	74.1308	74.3537		n/a
olv	PM	LAK15	ol7r	38.6275	0.0159	0.0373	0.0138	23.4099	0.3467	38.0676	0.2707	-0.0227			0.0746	100.864	74.3537					n/a
olv	PM	LAK15	ol8c	39.651	-0.0058	0.0207	0.0362	14.496	0.2176	45.4983	0.2798	-0.0124			0.25	100.45	84.839	83.5878	84.839	82.3367		n/a
olv	PM	LAK15	ol8r	39.2056	0.0083	0.0435	0.0291	16.6467	0.2476	43.5238	0.2816	-0.0092			0.2098	100.196	82.3367					n/a
olv	PM	LAK15	ol9c	39.6128	0.0098	0.0319	0.0362	13.8323	0.2334	45.801	0.2742	-0.014			0.2147	100.046	85.5144	83.3557	85.5144	81.197		n/a
olv	PM	LAK15	ol9r	38.773	0.0134	0.0486	0.0143	17.6032	0.2679	42.6367	0.2791	-0.0208			0.1945	99.8307	81.197					n/a
olv	PM	LAK15	ol10c	39.7261	0.0108	0.0322	0.0505	13.8169	0.2014	45.851	0.2919	-0.0205			0.2154	100.196	85.5417	85.5485	85.5417	85.5553		n/a
olv	PM	LAK15	ol10r	39.8189	0.0089	0.0347	0.0489	13.7947	0.2009	45.8277	0.2869	-0.0112			0.2107	100.232	85.5553					n/a
olv	PM	LAK16	ol1c	38.6707	0.0106	0.0553	0	22.6476	0.3245	38.8374	0.2657	0			0.1175	100.929	75.3536	75.1425	74.9492	74.991		n/a
olv	PM	LAK16	ol1c	38.3228	0.0029	0.0112	0	23.1317	0.3289	37.995	0.2641	0			0.079	100.136	74.5448					n/a
olv	PM	LAK16	ol1r	38.6609	0.0096	0.0221	0	22.3794	0.3163	39.0623	0.2662	0			0.0431	100.76	75.6806					n/a
olv	PM	LAK16	ol1r	38.5267	0.0107	0.0561	0.0136	22.688	0.3381	38.1581	0.2682	0			0.0976	100.157	74.991					n/a
olv	PM	LAK16	ol2c	40.2598	0.01	0.0345	0.0465	15.3038	0.2517	44.4814	0.2893	0.0041			0.1744	100.856	83.8241	81.536	83.8241	79.2479		n/a
olv	PM	LAK16	ol2r	38.936	0.0136	0.0433	0	19.2637	0.2907	41.2614	0.2896	0.0024			0.1303	100.231	79.2479					n/a
olv	PM	LAK17	ol1c	38.7814	0.005	0.0343	0.0118	22.3648	0.2974	39.1201	0.2663	0			0.1144	100.996	75.7198	75.6455	75.7198	75.5713		n/a
olv	PM	LAK17	ol1r	38.4208	0.0078	0.0071	0.0278	22.4577	0.3468	38.9672	0.2721	0			0.1149	100.622	75.5713					n/a
olv	PM	LAK17	ol2c	39.0208	0.0024	0	0.0294	19.1822	0.3285	41.9086	0.2936	0			0.1256	100.891	79.5717	73.1902	79.5717	66.8087		n/a
olv	PM	LAK17	ol2r	36.858	0.007	0.0413	0.0062	29.5248	0.3887	33.3329	0.2641	0			0.1069	100.53	66.8087					n/a
olv	PM	LAK17	ol3c	38.3306	0.023	0.0646	0.0299	22.6163	0.3477	39.3912	0.2818	0			0.0985	101.184	75.6411	75.5719	75.6411	75.5026		n/a
olv	PM	LAK17	ol3r	38.5015	0.0144	0.0223	0.0109	22.6013	0.3111	39.071	0.2693	0			0.0886	100.891	75.5026					n/a
olv	PM	LAK19	ol1c	38.4949	0.0135	0.0234	-0.0043	22.5601	0.3342	38.5034	0.2879	-0.018			0.1302	100.348	75.2649	75.2999	75.2649	75.3349		n/a
olv	PM	LAK19	ol1r	38.4706	0.0096	0.0048	0.001	22.4756	0.3249	38.5038	0.2749	-0.0279			0.0926	100.158	75.3349					n/a
olv	PM	LAK19	ol2c	37.8551	0.0098	0.0315	0.0041	22.3965	0.3401	38.745	0.2814	-0.0215			0.1027	99.7661	75.516	75.4674	75.516	75.4188		n/a
olv	PM	LAK19	ol2r	37.7053	0.0043	0.0244	0.0024	22.5019	0.3291	38.7234	0.2657	-0.0232			0.1238	99.6804	75.4188					n/a
olv	PM	LAK19	ol3c	40.0976	0.007	0.0437	0.03	13.8475	0.1893	45.4605	0.3045	-0.0129			0.2032	100.183	85.408	85.408	85.408			n/a
olv	PM	LAK19	ol4c	38.4784	0.0064	0.0172	-0.0247	22.6713	0.346	38.0804	0.2716	-0.0286			0.0803	99.9516	74.9665	74.9577	74.9665	74.9488		n/a
olv	PM	LAK19	ol4r	38.5261	0.0088	0.034	0.0427	22.8103	0.333	38.2777	0.2601	-0.0234			0.1031	100.396	74.9488					n/a
olv	PM	LAK19	ol5c	40.2307	0.0085	0.033	0.0645	13.9296	0.2181	45.6517	0.3013	-0.015			0.2194	100.657	85.3866	85.3119	85.3866	85.2372		n/a
olv	PM	LAK19	ol5r	40.3075	0.0013	0.0452	0.0465	14.0725	0.188	45.5731	0.2966	-0.017			0.1963	100.727	85.2372					n/a
olv	PM	LAK19	ol6r	38.4427	0.0181	0.0258	0.011	22.7639	0.3292	38.1584	0.2556	-0.0242			0.117	100.122	74.9284	74.5156	74.9284	74.1028		n/a
olv	PM	LAK19	ol6c	37.8777	0.0053	0.0143	-0.0024	23.545	0.3546	37.7884	0.2627	-0.017			0.0599	99.908	74.1028					n/a
olv	TS	LAK20	ol2r	36.6	0	0.037	0.022	30.389	0.434	32.367	0.31	0.006			0.064	100.23	65.5045	67.0586	68.6128	65.5045		c
olv	TS	LAK20	ol2c	36.936	0.012	0.065	0.016	28.061	0.395	34.406	0.281	0.023			0.073	100.267	68.6128					c
olv	TS	LAK20	ol6r	37.033	0.022	0.041	0.027	28.983	0.432	33.327	0.332	0.007			0.089	100.294	67.2142	68.1767	69.1392	67.2142		l
olv	TS	LAK20	ol6c	37.208	0.016	0.049	0.002	27.549	0.397	34.618	0.302	0.03			0.074	100.245	69.1392					l
olv	TS	LAK20	ol4rGM	36.143	0.026	0.041	0.021	33.624	0.507	29.497	0.363	0.023			0.075	100.321	60.9992	64.9458	67.4025	60.9992		c
olv	TS	LAK20	ol4GM	36.834	0.004	0.055	0.009	29.698	0.472	32.971	0.271	0.013			0.082	100.409	66.4358					c
olv	TS	LAK20	ol4cGM	36.792	0.017	0.041	0.031	28.905	0.409	33.523	0.266	0.028			0.091	100.104	67.4025					c
olv	TS	LAK20	ol1rGM	36.729	0.017	0.043	0.011	29.738	0.43	32.953	0.331	0.017			0.08	100.349	66.3936	67.0542	67.7148	66.3936		l
olv	TS	LAK20	ol1cGM	36.843	0.021	0.044	0	28.819	0.429	33.903	0.319	0.019			0.063	100.462	67.7148					l
olv	TS	LAK20	ol3rGM	35.121	0.025	0.051	0.006	37.091	0.51	26.303	0.379	0.009			0.066	99.56	55.8367	58.1542	60.4718	55.8367		l
olv	TS	LAK20	ol3cGM	35.837	0.02	0.024	0.024	34.01	0.484	29.183	0.355	0.005			0.054	99.995	60.4718					l
olv	TS	LAK20	ol5rGM	36.285	0.042	0.169	0.014	32.666	0.458	30.215	0.389	0.03			0.055	100.323	62.2514	66.502	70.7525	62.2514		l
olv	TS	LAK20	ol5cGM	37.435	0.021	0.04	0.019	26.409	0.39	35.833	0.293	0.021			0.07	100.532	70.7525					l
olv	TS	LAK20	ol1r	36.729	0.017	0.043	0.011	29.738	0.43	32.953	0.331	0.017			0.08	100.349	66.3936	60.9992	67.7148	66.3936		n/a
olv	TS	LAK20	ol1c	36.843	0.021	0.044	0	28.819	0.429	33.903	0.319	0.019			0.063	100.462	67.7148					n/a
olv	TS	LAK20	ol4rGM	36.143	0.026	0.041	0.021	33.624	0.507	29.497	0.363	0.023			0.075	100.321	60.9992	64.9458	67.4025	60.9992		n/a
olv	TS	LAK20	ol4GM	36.834	0.004	0.055	0.009	29.698	0.472	32.971	0.271	0.013			0.082	100.409	66.4358					n/a
olv	TS	LAK20	ol4cGM	36.792	0.017	0.041	0.031	28.905	0.409	33.523	0.266	0.028			0.091	100.104	67.4025					n/a
olv	PM	LAK22	ol1c	38.2911	0.0097	0.03	0.0131	22.9815	0.3366	38.6007	0.2588	-0.0206			0.0657	100.587	74.9662	75.0298	74.9662	75.0935		n/a
olv	PM	LAK22	ol1r	38.2927	0.0112	0.0333	0.0029	22.7394	0.3554	38.4544	0.2655	-0.0195			0.1002	100.255	75.0935					n/a
olv	PM	LAK22	ol2c	38.1261	0.0071	0.0298	0.0088	25.561	0.4077	36.1812	0.2593	-0.0281			0.0714	100.652	71.6202	71.9	71.6202	72.1797		n/a
olv	PM	LAK22	ol2r	37.9332	0.0084	0.0288	-0.0019	25.1704	0.3807	36.6288	0.2557	-0.0199			0.1094	100.516	72.1797					n/a
olv	PM	LAK22	ol3c	37.6058	0.0151	0.0356	0.0122	25.6572	0.3704	36.5794	0.2581	-0.0351			0.084	100.618	71.7661	72.316	71.7661	72.8658		n/a
olv	PM	LAK22	ol3r	38.3404	0.0211	0.0294	0.0013	24.467	0.3733	36.8524	0.2813	-0.0296			0.1088	100.475	72.8658					n/a
olv	PM	LAK22	ol4c	38.2993	0.0148	0.0211	0.0142	25.4396	0.4021	36.088	0.2561	-0.0324			0.0461	100.581	71.6645	71.6334	71.6645	71.6022		n/a
olv	PM	LAK22	ol4r	38.0987	0.0089	0.03	0.018	25.5792	0.3658	36.1748	0.2596	-0.0279			0.0533	100.588	71.6022					n/a
olv	PM	LAK22	ol5c	37.9691	0.0187	0.0304	0.0085	25.5448	0.3441	36.0659	0.2586	-0.0306			0.0288	100.269	71.5682	72.1183	71.5682	72.6685		n/a
olv	PM	LAK22	ol5r	38.4116	0.0157	0.0318	0.0001	24.816	0.3818	37.0077	0.2574	-0.0204			0.0995	101.022	72.6685					n/a
olv	PM	LAK22	ol6c	37.921	0.0239	0.0262	-0.0017	25.3975	0.3936	35.9309	0.2571	-0.0232			0.074	100.024	71.6096	71.5435	71.6096	71.4774		n/a
olv	PM	LAK22	ol6r	37.8548	0.0202	0.0387	-0.0072	25.5192	0.4032	35.8694	0.2553	-0.0283			0.0702	100.031	71.4774					n/a
olv	TS	LAK28	ol1r	35.396	0.013	0.025	0.035	34.338	0.474	29.478	0.293	0.02			0.09	100.16	60.4827	72.2844	74.8484	60.4827	262.736	c
olv	TS	LAK28	ol1	36.083	0.004	0.045	0	31.063	0.457	32.467	0.263	0.019			0.078	100.479	65.0772				246.315	c
olv	TS	LAK28	ol1	36.816	0	0.037	0.012	28.486	0.418	34.448	0.261	0.014			0.079	100.571	68.3146				229.894	c
olv	TS	LAK28	ol1	36.786	0	0.019	0.044	26.741	0.361	35.889	0.267	0.008			0.088	100.204	70.5258				213.473	c
olv	TS	LAK28	ol1	37.154	0	0.018	0.027	25.646	0.379	36.784	0.267	0.024			0.088	100.387	71.8878				197.052	c
olv	TS	LAK28	ol1	37.35	0	0.034	0.014	24.633	0.363	37.581	0.284	0			0.089	100.348	73.1185				180.631	c
olv	TS	LAK28	ol1	37.43	0	0.039	0.028	23.85	0.351	38.115	0.274	0.023			0.101	100.212	74.0209				164.21	c
olv	TS	LAK28	ol1	37.518	0	0.046	0.017	23.655	0.342	38.418	0.278	0.005			0.08	100.36	74.3298				147.789	c
olv	TS	LAK28	ol1	37.641	0	0.03	0.031	23.428	0.358	38.727	0.284	0.006			0.113	100.618	74.6652				131.368	c
olv	TS	LAK28	ol1	37.606	0	0.045	0.017	23.25	0.362	38.778	0.28	0.022			0.091	100.45	74.834				114.947	c
olv	TS	LAK28	ol1	37.655	0	0.042	0.029	23.238	0.337	38.68	0.276	0.008			0.115	100.38	74.796				98.526	c
olv	TS	LAK28	ol1	37.47	0	0.028	0.026	23.218	0.36	38.851	0.292	0.008			0.087	100.341	74.8953				82.105	c
olv	TS	LAK28	ol1	37.679	0	0.029	0.014	23.137	0.335	38.808	0.278	0.01			0.095	100.385	74.9401				65.684	c
olv	TS	LAK28	ol1	37.517	0	0.016	0.01	23.207	0.359	38.713	0.286	0.015			0.108	100.231	74.8372				49.263	c
olv	TS	LAK28	ol1	37.438	0.006	0.027	0.025	23.15	0.351	38.906	0.283	0.021			0.107	100.312	74.9769				32.842	c
olv	TS	LAK28	ol1c	37.615	0.01	0.042	0.013	23.243	0.363	38.796	0.275	0.013			0.096	100.465	74.8484				0	c
olv	TS	LAK28	ol2r	37.871	0.004	0.047	0.024	20.901	0.299	40.435	0.291	0.012			0.099	99.982	77.5238	77.3139	76.5461	77.5238	352.8	c
olv	TS	LAK28	ol2	38.145	0	0.033	0.017	20.901	0.348	40.388	0.287	0.01			0.115	100.245	77.5035				333.2	c
olv	TS	LAK28	ol2	37.931	0.004	0.052	0.028	20.903	0.32	40.519	0.293	0.025			0.121	100.195	77.5583				313.6	c
olv	TS	LAK28	ol2	38.241	0.003	0.039	0.023	20.975	0.321	40.557	0.294	0.017			0.102	100.572	77.5147				294	c
olv	TS	LAK28	ol2	38.17	0	0.04	0.015	20.945	0.326	40.604	0.28	0.021			0.143	100.543	77.5598				274.4	c
olv	TS	LAK28	ol2	37.944	0	0.051	0.04	20.93	0.305	40.601	0.284	0.003			0.106	100.263	77.571				254.8	c
olv	TS	LAK28	ol2	38.202	0	0.035	0.049	20.789	0.344	40.611	0.283	0.012			0.1	100.425	77.6926				235.2	c
olv	TS	LAK28	ol2	37.942	0.004	0.041	0.048	20.766	0.325	40.507	0.29	0.009			0.119	100.051	77.6674				215.6	c
olv	TS	LAK28	ol2	38.141	0.004	0.032	0.038	20.954	0.318	40.503	0.287	0.015			0.106	100.399	77.5089				196	c
olv	TS	LAK28	ol2	38.051	0	0.043	0.03	20.701	0.335	40.411	0.291	0.019			0.114	99.996	77.6806				176.4	c
olv	TS	LAK28	ol2	38.176	0	0.055	0.022	21.061	0.319	40.667	0.29	0.024			0.124	100.738	77.4906				156.8	c
olv	TS	LAK28	ol2	38.03	0	0.043	0.016	20.906	0.34	40.391	0.285	0.018			0.112	100.14	77.5007				137.2	c
olv	TS	LAK28	ol2	38.065	0.003	0.031	0.036	21.04	0.335	40.362	0.286	0.019			0.127	100.303	77.3765				117.6	c
olv	TS	LAK28	ol2	38.173	0	0.04	0.037	21.174	0.315	40.379	0.3	0.025			0.125	100.569	77.2725				98	c
olv	TS	LAK28	ol2	38.238	0	0.041	0.01	21.236	0.36	40.236	0.294	0.009			0.131	100.556	77.1587				78.4	c
olv	TS	LAK28	ol2	37.685	0	0.066	0.027	20.841	0.297	39.181	0.279	0.011			0.123	98.51	77.021				58.8	c
olv	TS	LAK28	ol2	38.1	0.005	0.068	0.025	21.686	0.365	39.846	0.293	0.021			0.099	100.508	76.613				39.2	c
olv	TS	LAK28	ol2	37.98	0	0.047	0.029	22.029	0.332	39.569	0.296	0.03			0.109	100.42	76.2043				19.6	c
olv	TS	LAK28	ol2c	38.255	0	0.047	0.017	21.702	0.339	39.727	0.328	0.009			0.091	100.516	76.5461				0	c
olv	TS	LAK28	ol3r	36.553	0.005	0.047	0.009	29.77	0.442	33.593	0.276	0.004			0.083	100.782	66.7976	70.7226	73.2089	66.7976	110.763	c
olv	TS	LAK28	ol3	36.655	0.014	0.049	0.038	27.847	0.389	35.068	0.28	0			0.103	100.442	69.1852				98.456	c
olv	TS	LAK28	ol3	36.483	0.022	0.038	0.007	27.611	0.424	34.96	0.302	0.011			0.086	99.943	69.3008				86.149	c
olv	TS	LAK28	ol3	37.232	0.035	0	0.041	27.844	0.398	34.798	0.312	0.012			0.088	100.76	69.0225				73.842	c
olv	TS	LAK28	ol3	36.854	0.02	0.038	0.011	27.123	0.387	35.738	0.3	0.015			0.071	100.558	70.1418				61.535	c
olv	TS	LAK28	ol3	37.121	0.019	0.055	0.004	26.542	0.4	36.146	0.284	0.007			0.105	100.684	70.8285				49.228	c
olv	TS	LAK28	ol3	37.304	0.011	0.043	0.036	25.12	0.381	37.242	0.27	0.025			0.086	100.518	72.5518				36.921	c
olv	TS	LAK28	ol3	37.313	0.001	0.045	0.036	24.736	0.391	37.537	0.268	0.036			0.109	100.471	73.0133				24.614	c
olv	TS	LAK28	ol3	37.583	0.006	0.045	0.021	24.58	0.384	37.61	0.27	0.022			0.094	100.615	73.1759				12.307	c
olv	TS	LAK28	ol3c	37.284	0.007	0.027	0.023	24.585	0.365	37.681	0.275	0.02			0.101	100.369	73.2089				0	c
olv	TS	LAK28	ol4rGM	34.68	0.028	0.034	0.025	40.226	0.563	24.65	0.307	0.022			0.056	100.592	52.2109	60.391	64.6832	52.2109	70	l
olv	TS	LAK28	ol4GM	34.659	0.009	0.042	0.024	39.952	0.546	24.963	0.284	0.018			0.057	100.554	52.696				60	l
olv	TS	LAK28	ol4GM	35.265	0.007	0.025	0.013	35.848	0.524	28.231	0.275	0.008			0.071	100.267	58.4036				50	l
olv	TS	LAK28	ol4GM	35.69	0	0.03	0.019	33.414	0.476	30.261	0.263	0.014			0.076	100.244	61.7539				40	l
olv	TS	LAK28	ol4GM	35.823	0.004	0.046	0.02	31.897	0.491	31.522	0.262	0.007			0.077	100.149	63.7933				30	l
olv	TS	LAK28	ol4GM	36.189	0	0.021	0.018	31.324	0.472	32.061	0.26	0.024			0.077	100.445	64.5996				20	l
olv	TS	LAK28	ol4GM	35.969	0.013	0.033	0.006	31.102	0.454	32.38	0.257	0.004			0.052	100.27	64.9877				10	l
olv	TS	LAK28	ol4cGM	36.007	0.009	0.038	0.005	31.232	0.431	32.084	0.257	0.009			0.067	100.138	64.6832				0	l
olv	PM	LAK28a	ol1c	39.1118	0.0087	0.0541	0.0127	20.6287	0.3088	40.0885	0.2975	0			0.083	100.594	77.6022	75.573	77.6022	73.5437		n/a
olv	PM	LAK28a	ol1r	38.158	0.0119	0.0457	0.0046	23.8609	0.3815	37.2033	0.2762	0			0.0652	100.007	73.5437					n/a
olv	PM	LAK28a	ol2c	40.3525	0.0017	0.0354	0.0333	14.7388	0.2276	44.5347	0.289	0			0.1786	100.392	84.3435	78.6826	84.3435	73.0217		n/a
olv	PM	LAK28a	ol2r	38.2873	0.0124	0.0412	0	24.2081	0.3322	36.7516	0.2606	0.0068			0.0991	99.9991	73.0217					n/a
olv	PM	LAK28a	ol3c	38.899	0.0034	0.0044	0.0273	19.1723	0.2269	41.267	0.2963	0			0.0804	99.9771	79.3282	76.6129	79.3282	73.8975		n/a
olv	PM	LAK28a	ol3r	38.3876	0	0.0361	0.0195	23.6607	0.3409	37.571	0.263	0			0.1207	100.4	73.8975					n/a
olv	PM	LAK28b	ol1c	39.6435	0.0136	0.0292	0.0512	17.4469	0.2694	43.2151	0.3094	0			0.1675	101.146	81.5365	79.9073	81.5365	78.2781		n/a
olv	PM	LAK28b	ol1r	39.069	0	0.0897	0.0186	20.1011	0.324	40.6293	0.2842	0			0.1223	100.638	78.2781					n/a
olv	PM	LAK28b	ol2c	38.5867	0.0046	0.0046	0.0281	22.072	0.3478	38.9238	0.2816	0			0.0882	100.338	75.8693	74.8657	75.8693	73.8621		n/a
olv	PM	LAK28b	ol2r	38.3448	0.0157	0.0192	0.0188	23.6139	0.3534	37.4281	0.2612	0			0.1058	100.161	73.8621					n/a
olv	TS	LAK29	ol3r	37.549	0	0.062	0.018	26.147	0.406	35.722	0.291	0.018			0.094	100.306	70.8944	73.7952	74.0597	70.8944		c
olv	TS	LAK29	ol3	37.569	0	0.044	0.025	24.907	0.391	36.963	0.282	0.017			0.088	100.286	72.5717					c
olv	TS	LAK29	ol3	37.786	0	0.049	0.032	23.918	0.354	37.61	0.273	0.02			0.126	100.169	73.7084					c
olv	TS	LAK29	ol3	37.858	0	0.055	0.043	23.548	0.386	37.888	0.281	0.031			0.109	100.2	74.1508					c
olv	TS	LAK29	ol3	37.908	0	0.044	0.025	23.496	0.39	37.944	0.269	0.008			0.098	100.182	74.2214					c
olv	TS	LAK29	ol3	37.642	0.001	0.053	0.022	23.427	0.397	38.084	0.266	0.023			0.128	100.043	74.348					c
olv	TS	LAK29	ol3	37.732	0.001	0.047	0.024	23.61	0.35	38.017	0.283	0.012			0.117	100.192	74.1656					c
olv	TS	LAK29	ol3	37.699	0	0.046	0.034	23.664	0.391	37.932	0.27	0.009			0.092	100.137	74.0788					c
olv	TS	LAK29	ol3	37.648	0	0.038	0.027	23.604	0.388	37.957	0.285	0.021			0.124	100.093	74.1402					c
olv	TS	LAK29	ol3	37.913	0	0.023	0.024	23.698	0.367	38.006	0.274	0.011			0.091	100.405	74.0887					c
olv	TS	LAK29	ol3	37.81	0	0.05	0.021	23.391	0.364	37.806	0.293	0.12			0.122	99.976	74.2374					c
olv	TS	LAK29	ol3	37.845	0	0.031	0.021	23.616	0.371	38.007	0.274	0.016			0.105	100.285	74.1557					c
olv	TS	LAK29	ol3	37.893	0	0.04	0.019	23.771	0.37	37.967	0.281	0.02			0.109	100.47	74.0098					c
olv	TS	LAK29	ol3	37.995	0	0.017	0.019	23.635	0.396	37.923	0.282	0.015			0.097	100.38	74.0978					c
olv	TS	LAK29	ol3c	37.904	0	0.048	0.026	23.652	0.363	37.875	0.278	0.031			0.11	100.287	74.0597					c
olv	TS	LAK29	ol4r	38.078	0	0.037	0.018	23.952	0.399	37.462	0.277	0.028			0.097	100.348	73.6043	74.085	74.127	73.6043		c
olv	TS	LAK29	ol4	38.103	0	0.055	0.009	23.88	0.366	37.804	0.275	0.018			0.091	100.599	73.8387					c
olv	TS	LAK29	ol4	37.829	0	0.039	0.033	23.471	0.376	37.999	0.284	0.028			0.094	100.152	74.2695					c
olv	TS	LAK29	ol4	37.935	0.008	0.056	0.015	23.436	0.362	37.974	0.28	0.018			0.115	100.199	74.2854					c
olv	TS	LAK29	ol4	37.903	0.002	0.043	0.01	23.631	0.352	38.016	0.272	0.019			0.118	100.366	74.148					c
olv	TS	LAK29	ol4	38.108	0.002	0.045	0.026	23.591	0.379	37.999	0.273	0.004			0.131	100.558	74.1719					c
olv	TS	LAK29	ol4	37.77	0.009	0.041	0.014	23.61	0.378	37.721	0.3	0.011			0.107	99.96	74.0155					c
olv	TS	LAK29	ol4	37.85	0.001	0.044	0.008	23.695	0.379	37.881	0.322	0.016			0.11	100.306	74.0278					c
olv	TS	LAK29	ol4	37.59	0.003	0.05	0.004	23.507	0.382	38.006	0.268	0.015			0.12	99.945	74.2437					c
olv	TS	LAK29	ol4	37.508	0	0.047	0.024	23.742	0.35	38.055	0.282	0.017			0.105	100.13	74.0778					c
olv	TS	LAK29	ol4	37.913	0.008	0.433	0.025	23.343	0.388	37.5	0.415	0.049			0.116	100.19	74.1211					c
olv	TS	LAK29	ol4	37.516	0.001	0.046	0.027	23.59	0.363	38.001	0.29	0.025			0.134	99.993	74.1737					c
olv	TS	LAK29	ol4c	37.548	0.007	0.043	0.011	23.642	0.382	37.992	0.285	0.018			0.096	100.024	74.127					c
olv	TS	LAK29	ol2r	36.519	0.004	0.036	0.011	29.853	0.429	32.977	0.268	0.015			0.092	100.205	66.3237	72.6735	73.5039	66.3237	144.118	l
olv	TS	LAK29	ol2	37.04	0.008	0.033	0.01	26.708	0.385	35.484	0.285	0.015			0.1	100.068	70.3151				133.032	l
olv	TS	LAK29	ol2	37.357	0	0.046	0.017	24.876	0.37	36.889	0.289	0.027			0.102	99.972	72.5566				121.946	l
olv	TS	LAK29	ol2	37.511	0.001	0.043	0.035	24.195	0.341	37.419	0.287	0.016			0.079	99.927	73.3853				110.86	l
olv	TS	LAK29	ol2	37.511	0	0.04	0.026	23.944	0.364	37.663	0.284	0.041			0.09	99.962	73.7146				99.774	l
olv	TS	LAK29	ol2	37.502	0.003	0.027	0.014	23.865	0.378	37.632	0.272	0.018			0.082	99.793	73.7627				88.688	l
olv	TS	LAK29	ol2	37.686	0	0.052	0.037	24.071	0.38	37.495	0.276	0.011			0.112	100.121	73.5251				77.602	l
olv	TS	LAK29	ol2	37.703	0	0.056	0.023	24.159	0.38	37.306	0.275	0.023			0.097	100.023	73.3553				66.516	l
olv	TS	LAK29	ol2	37.628	0	0.034	0.009	24.354	0.378	37.361	0.281	0.021			0.101	100.167	73.2268				55.43	l
olv	TS	LAK29	ol2	37.569	0	0.024	0.027	24.378	0.373	37.427	0.271	0.025			0.086	100.179	73.2421				44.344	l
olv	TS	LAK29	ol2	37.831	0	0.05	0.009	24.04	0.378	37.402	0.279	0.019			0.094	100.103	73.5018				33.258	l
olv	TS	LAK29	ol2	37.826	0	0.026	0.04	23.958	0.352	37.51	0.281	0.009			0.107	100.108	73.6243				22.172	l
olv	TS	LAK29	ol2	37.926	0.004	0.025	0.033	24.171	0.366	37.395	0.293	0.006			0.108	100.326	73.3922				11.086	l
olv	TS	LAK29	ol2c	37.816	0.013	0.057	0.034	24.101	0.377	37.501	0.296	0.027			0.103	100.324	73.5039				0	l
olv	TS	LAK29	ol1GM	36.116	0.027	0.03	0.015	33.005	0.479	30.156	0.353	0.021			0.045	100.247	61.9624	63.2996	63.8727	61.9624	40.008	l
olv	TS	LAK29	ol1GM	36.422	0.022	0.027	0.035	32.13	0.442	30.788	0.331	0.022			0.072	100.291	63.078				30.006	l
olv	TS	LAK29	ol1GM	36.614	0.006	0.038	0.029	31.767	0.479	31.162	0.292	0.018			0.056	100.461	63.6221				20.004	l
olv	TS	LAK29	ol1GM	36.583	0.005	0.048	0.031	31.548	0.44	31.407	0.292	0.027			0.071	100.452	63.9628				10.002	l
olv	TS	LAK29	ol1cGM	36.679	0.017	0.047	0.025	31.733	0.459	31.468	0.299	0.014			0.082	100.822	63.8727				0	l
olv	PM	LAK29	ol1c	38.3855	0.0099	0.0191	-0.001	22.8331	0.3174	38.2902	0.2682	-0.0259			0.1133	100.237	74.9362	75.0607	74.9362	75.1851		n/a
olv	PM	LAK29	ol1r	38.3119	0.0205	0.0147	-0.0009	22.6243	0.3451	38.448	0.2619	-0.0193			0.144	100.17	75.1851					n/a
olv	PM	LAK29	ol2c	38.42	0.0269	0.0219	-0.0002	23.0689	0.3315	38.2904	0.2659	-0.0182			0.1076	100.533	74.7428	74.8385	74.7428	74.9341		n/a
olv	PM	LAK29	ol2r	38.0557	0.0062	0.0295	0.0187	22.8604	0.349	38.3317	0.2613	-0.028			0.1371	100.05	74.9341					n/a
olv	PM	LAK29	ol3c	38.2986	0.0113	0.036	0.0323	22.5082	0.3273	38.8524	0.2738	-0.0248			0.0901	100.43	75.4752	75.3318	75.4752	75.1883		n/a
olv	PM	LAK29	ol3r	38.4488	0.0185	0.055	0.024	22.5833	0.3255	38.3849	0.2577	-0.0241			0.0873	100.185	75.1883					n/a
olv	PM	LAK29	ol4c	40.1193	0.0008	0.0307	0.0347	14.6028	0.2217	45.1726	0.292	-0.0082			0.1724	100.647	84.6513	84.2909	84.6513	83.9306		n/a
olv	PM	LAK29	ol4r	39.7615	0.0086	0.0248	0.0468	15.232	0.2048	44.6227	0.2969	-0.0186			0.1917	100.39	83.9306					n/a
olv	PM	LAK29	ol5c	39.874	0.0089	0.0401	0.045	13.9174	0.2042	45.5539	0.306	-0.0096			0.2273	100.177	85.3708	84.8731	85.3708	84.3754		n/a
olv	PM	LAK29	ol5r	39.9998	0.0051	0.0401	0.032	14.9029	0.2283	45.1394	0.2938	-0.015			0.1971	100.838	84.3754					n/a
olv	PM	LAK29	ol6c	38.6667	0.0185	0.0273	0.0154	22.4041	0.3123	38.4585	0.2602	-0.0159			0.0837	100.247	75.3722	75.3767	75.3722	75.3811		n/a
olv	PM	LAK29	ol6r	38.9156	0.0037	0.0272	-0.0031	22.3896	0.3214	38.4519	0.2609	-0.0176			0.0999	100.47	75.3811					n/a
olv	PM	LAK32	ol1c	37.9606	0.0206	0.0184	-0.0146	22.7771	0.3243	38.5442	0.2715	-0.0254			0.0748	99.9915	75.1061	73.8469	75.1061	72.5878		n/a
olv	PM	LAK32	ol1r	37.5205	0.0125	0.0132	0.019	24.8482	0.348	36.9056	0.2687	-0.0234			0.0755	100.011	72.5878					n/a
olv	PM	LAK32	ol2c	37.7135	0.0063	0.0259	0.0023	22.7228	0.3654	38.628	0.2641	-0.0223			0.0811	99.8093	75.1912	75.1443	75.1912	75.0974		n/a
olv	PM	LAK32	ol2r	38.0121	0.0114	0.0232	-0.0108	22.8593	0.33	38.6652	0.2709	-0.027			0.0861	100.258	75.0974					n/a
olv	PM	LAK32	ol3c	37.9118	0.0113	0.0174	-0.0089	22.8719	0.3466	38.5375	0.2635	-0.0188			0.1137	100.074	75.0251	75.1583	75.0251	75.2915		n/a
olv	PM	LAK32	ol3r	37.898	0.0115	0.0257	0.01	22.5604	0.3294	38.5589	0.278	-0.0256			0.1101	99.7819	75.2915					n/a
olv	PM	LAK32	ol4c	38.2964	0.008	0.0174	0.0136	22.7503	0.3376	38.5481	0.2612	-0.0145			0.1174	100.35	75.13	73.0952	75.13	71.0604		n/a
olv	PM	LAK32	ol4r	37.4808	0.0012	0.0206	-0.0118	26.0936	0.3723	35.9375	0.2397	-0.0278			0.0794	100.225	71.0604					n/a
olv	PM	LAK32	ol5c	37.4663	0.0011	0.0259	0.0346	22.8569	0.3369	38.7916	0.2731	-0.0267			0.1093	99.8956	75.1603	75.2589	75.1603	75.3576		n/a
olv	PM	LAK32	ol5r	37.4048	0.0061	0.0306	0.0086	22.54	0.3126	38.6612	0.2575	-0.0188			0.068	99.2894	75.3576					n/a
olv	PM	LAK32	ol6c	38.2014	0.0145	0.0321	0.0034	22.7875	0.3299	38.5607	0.2682	-0.0228			0.0676	100.265	75.1056	75.1984	75.1056	75.2913		n/a
olv	PM	LAK32	ol6r	38.1636	0.0239	0.0249	0.011	22.6217	0.362	38.6633	0.2765	-0.019			0.0853	100.232	75.2913					n/a
olv	PM	LAK34	ol1c	38.5178	0.0149	0.013	0.01	22.3063	0.3755	38.5554	0.2811	0			0.0944	100.168	75.4999	75.4943	75.4999	75.4886		n/a
olv	PM	LAK34	ol1r	38.6005	0.0138	0.0044	0.0115	22.3482	0.34	38.6042	0.2823	0			0.0732	100.278	75.4886					n/a
olv	PM	LAK34	ol2c	38.6792	0.0135	0.0327	0.0077	22.8693	0.3387	38.3167	0.2881	0			0.1067	100.653	74.9194	75.0087	74.9194	75.0979		n/a
olv	PM	LAK34	ol2r	38.8018	0.0063	0.072	0.0059	22.6554	0.3298	38.3215	0.2715	0			0.0784	100.543	75.0979					n/a
olv	PM	LAK36	ol1c	38.6542	0.0097	0.0367	0.0018	20.2407	0.3258	40.6619	0.2805	-0.0231			0.1045	100.316	78.1738	78.1078	78.1738	78.0418		n/a
olv	PM	LAK36	ol1r	38.8226	0.0064	0.0129	0.0205	20.4004	0.2824	40.6674	0.2837	-0.0161			0.07	100.566	78.0418					n/a
olv	PM	LAK36	ol2c	38.915	0.0102	0.015	0.0238	19.0137	0.3066	41.6928	0.2777	-0.0189			0.1263	100.381	79.6311	79.6985	79.6311	79.7659		n/a
olv	PM	LAK36	ol2c	38.9784	0.0178	0.0204	0.0116	18.8628	0.2828	41.7078	0.2836	-0.0237			0.1002	100.265	79.7659					n/a
olv	PM	LAK36	ol3c	37.9849	0.0034	0.0126	0.0239	20.5678	0.3005	40.6342	0.2744	-0.0141			0.1004	99.9022	77.8873	70.6386	77.8873	63.3899		n/a
olv	PM	LAK36	ol3r	35.8803	0.0129	0.0249	0.0076	31.9598	0.4305	31.0385	0.2622	-0.0405			0.0735	99.6901	63.3899					n/a
olv	PM	LAK36	ol4c	37.9843	0.0066	0.0221	0.0146	22.7601	0.3393	38.5771	0.2608	-0.0239			0.0969	100.062	75.136	75.2686	75.136	75.4011		n/a
olv	PM	LAK36	ol4r	37.9332	0.0105	0.0376	0.0229	22.5088	0.3417	38.6984	0.2673	-0.0201			0.1597	99.9801	75.4011					n/a
olv	PM	LAK36	ol5c	38.0776	0.0049	0.0155	0.0166	20.375	0.2989	40.776	0.287	-0.012			0.0881	99.9397	78.1087	78.1198	78.1087	78.131		n/a
olv	PM	LAK36	ol5r	38.1303	0.0217	0.0209	0.0258	20.3066	0.2957	40.692	0.2686	-0.0117			0.098	99.8596	78.131					n/a
olv	PM	LAK36	ol6c	38.782	0.0095	0.0335	0.0171	18.8614	0.2672	41.9016	0.2763	-0.0214			0.1284	100.277	79.8418	79.7173	79.8418	79.5927		n/a
olv	PM	LAK36	ol6r	39.122	-0.0014	0.0244	0.0152	19.0569	0.2668	41.6888	0.2859	-0.0239			0.1608	100.621	79.5927					n/a
olv	PM	LAK36	ol7c	38.2294	0.0307	0.0186	0.0134	23.0292	0.3559	38.1965	0.2649	-0.0253			0.0728	100.211	74.729	74.7547	74.729	74.7804		n/a
olv	PM	LAK36	ol7r	38.2772	0.0096	0.0222	0.0112	23.0105	0.3213	38.2696	0.2582	-0.0212			0.1181	100.298	74.7804					n/a
olv	PM	LAK39	ol1c	37.612	0.0169	0.0372	0.0109	23.0445	0.3178	37.9269	0.278	-0.0495			0.1235	99.3677	74.5824	74.6253	74.5478	74.5806		n/a
olv	PM	LAK39	ol1c	37.4915	0.013	0.0018	0.0032	23.2559	0.3204	38.1353	0.291	-0.0172			0.092	99.6041	74.5131					n/a
olv	PM	LAK39	ol1r	37.4855	0.0119	0.0193	0.0062	23.2343	0.3234	38.2356	0.2864	-0.0328			0.0894	99.6919	74.5806					n/a
olv	PM	LAK39	ol2c	37.4795	0.0097	0.0175	0.0074	23.4387	0.343	38.0727	0.2824	-0.0355			0.1344	99.7853	74.3328	73.5351	74.3328	72.7374		n/a
olv	PM	LAK39	ol2r	37.6207	0.0376	0.0349	0.0164	24.7026	0.3805	36.9668	0.2803	-0.0329			0.0998	100.14	72.7374					n/a
olv	PM	LAK39	ol3c	38.3752	0.0139	0.0702	0.0113	20.4907	0.3269	40.1843	0.2759	-0.0272			0.131	99.8794	77.76	77.1181	77.76	76.4761		n/a
olv	PM	LAK39	ol3r	37.7481	0.0112	0.0159	0.0156	21.6262	0.3105	39.4344	0.287	-0.015			0.1331	99.5819	76.4761					n/a
olv	PM	LAK40	ol1c	38.9342	0.0215	0.0406	0.0135	20.0341	0.2782	40.8552	0.2817	-0.0156			0.1084	100.567	78.4287	78.4288	78.4287	78.4101		n/a
olv	PM	LAK40	ol1r	38.9555	0.0092	0.0246	0.0198	19.9643	0.2996	40.8726	0.2911	-0.0095			0.1091	100.546	78.4949					n/a
olv	PM	LAK40	ol1r	38.8056	0.0073	0.0302	0.0242	20.029	0.3204	40.8	0.2738	-0.021			0.0929	100.383	78.4101					n/a
olv	PM	LAK40	ol1c	39.0073	0.0122	0.0153	-0.0015	20.0419	0.303	40.7574	0.2788	-0.0273			0.1291	100.545	78.3816					n/a
olv	PM	LAK40	ol2c	39.6694	0.0033	0.0393	0.0367	15.5185	0.2295	44.5294	0.2787	-0.0144			0.1514	100.456	83.6491	77.5671	83.6491	65.4846		n/a
olv	PM	LAK40	ol2c	38.9333	0.0052	0.0178	0.0451	15.6555	0.2404	44.6565	0.2675	-0.0198			0.2247	100.046	83.5677					n/a
olv	PM	LAK40	ol2r	36.7071	0.0421	0.0163	-0.0131	30.24	0.4356	32.18	0.289	-0.0391			0.07	99.9802	65.4846					n/a
olv	PM	LAK40	ol3c	37.2331	0.0129	0.0376	-0.0066	27.0347	0.4062	35.1069	0.2498	-0.0329			0.0351	100.116	69.8361	69.8361	69.8361	69.8361		n/a
olv	PM	LAK40	ol4c	38.0547	0.0218	0.0169	0.0054	23.2142	0.386	38.458	0.2634	-0.0266			0.1027	100.523	74.7067	74.8249	74.7067	74.9432		n/a
olv	PM	LAK40	ol4r	37.5846	0.0147	0.0176	-0.002	23.0509	0.3583	38.6698	0.2616	-0.0242			0.0782	100.036	74.9432					n/a
olv	PM	LAK40	ol5c	38.1828	0.0248	0.0041	0.0208	22.8281	0.336	38.2418	0.2751	-0.023			0.0755	99.9891	74.9165	74.1254	74.9165	73.3342		n/a
olv	PM	LAK40	ol5r	37.9927	0.02	0.0159	0.0295	24.2744	0.359	37.4437	0.2482	-0.0258			0.0827	100.466	73.3342					n/a
olv	PM	LAK40	ol1c	40.4489	0.0098	0.0927	0.0098	14.0726	0.1932	45.615	0.3172	0			0.1922	100.951	85.2486	80.3793	85.2486	75.5101		n/a
olv	PM	LAK40	ol1r	38.9796	0.01	0.0576	0.0299	22.3104	0.3118	38.5836	0.2713	0			0.1412	100.695	75.5101					n/a
olv	PM	LAK40	ol2c	39.0711	0.0129	0.0863	0.0076	22.8725	0.3056	38.6046	0.2691	0			0.087	101.317	75.0572	74.9153	75.0572	74.7734		n/a
olv	PM	LAK40	ol2r	38.6676	0.0065	0	0.0112	22.9729	0.3644	38.1928	0.2682	0			0.0889	100.572	74.7734					n/a
olv	PM	LAK40	ol3c	41.0601	0.0067	0.0876	0.0321	14.007	0.2087	46.0324	0.3148	0			0.1813	101.931	85.4211	80.8894	85.4211	76.3577		n/a
olv	PM	LAK40	ol3r	39.0766	0.0004	0.101	0.0133	21.6281	0.2786	39.1796	0.2813	0			0.1088	100.668	76.3577					n/a
olv	PM	LAK40	ol4c	40.815	0.0064	0.0467	0.0543	13.8202	0.214	45.7283	0.3099	0			0.1531	101.148	85.5055	80.6014	85.5055	75.6973		n/a
olv	PM	LAK40	ol4r	39.2587	0.0022	0.058	0	22.1758	0.303	38.7422	0.2828	0			0.1083	100.931	75.6973					n/a
olv	PM	LAK41	ol1c	38.9663	0.0179	0.0215	0.0113	20.0727	0.31	40.3184	0.2967	-0.0149			0.1182	100.133	78.1713	78.1653	78.1713	78.1593		n/a
olv	PM	LAK41	ol1r	39.2768	0.0086	0.0379	0.0131	20.0623	0.2619	40.2693	0.2903	-0.019			0.1174	100.338	78.1593					n/a
olv	PM	LAK41	ol2c	39.8931	0.0201	0.0628	0.0334	13.8315	0.1673	45.5419	0.2971	-0.015			0.2122	100.059	85.4447	85.0934	85.4447	84.742		n/a
olv	PM	LAK41	ol2r	40.0312	0.0112	0.0517	0.0257	14.5159	0.2086	45.2194	0.293	-0.013			0.1958	100.552	84.742					n/a
olv	PM	LAK41	ol3c	40.4342	0.0011	0.0445	0.0619	13.8339	0.1939	45.907	0.2973	-0.0098			0.176	100.95	85.5416	81.8141	85.5416	78.0865		n/a
olv	PM	LAK41	ol3r	39.011	0.0035	0.0426	0.0261	20.3074	0.2912	40.588	0.2816	-0.0162			0.1417	100.693	78.0865					n/a
olv	PM	LAK41	ol4c	40.006	0.0025	0.047	0.0398	15.2362	0.2394	44.0722	0.2925	-0.0105			0.2017	100.137	83.7587	83.7542	83.7587	83.7497		n/a
olv	PM	LAK41	ol4r	39.8633	0.0045	0.0395	0.0621	15.3339	0.2036	44.3255	0.2956	-0.0133			0.241	100.369	83.7497					n/a
olv	PM	LAK41	ol5c	38.6187	0.0218	0.036	0.0281	22.3882	0.3472	38.3636	0.267	-0.0262			0.0737	100.144	75.3395	75.0992	75.3395	74.8588		n/a
olv	PM	LAK41	ol5r	38.719	0.0073	0.0178	0.0074	22.8701	0.3515	38.1948	0.2744	-0.0195			0.1178	100.56	74.8588					n/a
olv	PM	LAK41	ol6c	38.5015	0.0092	0.0507	0.0294	20.0536	0.3136	40.4352	0.2944	-0.0155			0.1298	99.8174	78.2368	78.2119	78.2368	78.1869		n/a
olv	PM	LAK41	ol6r	39.0281	0.0034	0.0375	0.0018	20.157	0.3129	40.5249	0.2762	-0.0213			0.1158	100.458	78.1869					n/a
olv	PM	LAK41	ol7c	39.0698	0.0116	0.0284	0.0035	20.4087	0.2993	40.0502	0.2827	-0.0143			0.1118	100.266	77.7715	74.0898	77.7715	70.4081		n/a
olv	PM	LAK41	ol7r	37.912	0.0227	0.023	-0.001	26.3375	0.3811	35.1482	0.2485	-0.0256			0.0626	100.136	70.4081					n/a
olv	PM	LAK42	ol1c	40.2226	0	0.0402	0.049	14.2777	0.23	46.1906	0.3002	0			0.1783	101.489	85.2243	83.7246	85.2243	82.2248		n/a
olv	PM	LAK42	ol1r	39.2782	0.0041	0.0313	0.0432	16.9416	0.247	43.9564	0.2895	0			0.177	100.969	82.2248					n/a
olv	PM	LAK42	ol2c	40.1354	0.0018	0.0675	0.0376	13.7724	0.1793	46.4779	0.2863	0			0.1953	101.153	85.7483	84.6462	85.7483	83.5441		n/a
olv	PM	LAK42	ol2r	39.8044	0	0.0834	0.035	15.6238	0.2164	44.4898	0.3088	0.0161			0.2115	100.789	83.5441					n/a
olv	PM	LAK42	ol3c	39.3729	0	0.0029	0.0301	19.4671	0.2769	41.182	0.2894	0			0.123	100.744	79.0428	76.8613	79.0428	74.6798		n/a
olv	PM	LAK42	ol3r	38.8076	0.0141	0	0.0255	23.0368	0.3603	38.1098	0.2691	0			0.0975	100.721	74.6798					n/a
olv	PM	LAK42	ol4c	40.1541	0.0022	0.0017	0.1051	13.7079	0.191	46.368	0.303	0			0.2094	101.042	85.7767	82.2269	85.7767	78.6772		n/a
olv	PM	LAK42	ol4r	38.7533	0.0221	0.0083	0.1053	19.8675	0.2566	41.1174	0.2595	0			0.1469	100.537	78.6772					n/a
olv	PM	LAKt07	ol1c	36.97	0.054	0.06	0.023	26.947	0.391	35.638	0.377	0.006			0.087	100.553	70.2194					n/a
olv	PM	LAKt07	ol1r	37.611	0.226	0.364	0.009	24.882	0.389	35.834	0.882	0.053			0.107	100.355	71.9702					n/a
olv	PM	LAKt07	ol2c	37.542	0.047	0.053	0.019	25.542	0.399	36.821	0.338	0.007			0.073	100.842	71.9902					n/a
olv	PM	LAKt07	ol2r	37.658	0.05	0.062	0.017	25.957	0.422	36.317	0.361	0.007			0.107	100.959	71.3833					n/a
olv	PM	LAKt07	ol3	37.575	0.067	0.146	0.014	24.615	0.37	36.99	0.417	0.016			0.089	100.299	72.8202					n/a
olv	PM	LAKt07	ol4c	37.755	0.061	0.031	0.036	25.556	0.388	36.386	0.376	0.024			0.099	100.71	71.7388					n/a
olv	PM	LAKt07	ol4r	37.628	0.068	0.049	0.019	25.184	0.368	37.039	0.382	0.014			0.088	100.84	72.392					n/a
olv	PM	LAKt07	ol5c	37.958	0.171	0.37	0.037	24.249	0.375	36.31	0.693	0.136			0.089	100.388	72.7494					n/a
olv	PM	LAKt07	ol5r	37.59	0.04	0.06	0.027	24.457	0.372	37.104	0.352	0.023			0.121	100.146	73.0082					n/a
olv	PM	LAKt24	ol1r	37.506	0.082	0.034	0.007	24.484	0.386	36.61	0.358	0.011			0.094	99.573	72.7214					n/a
olv	PM	LAKt24	ol1	37.372	0.061	0.045	0.016	24.559	0.391	36.819	0.354	0.008			0.107	99.733	72.7736					n/a
olv	PM	LAKt24	ol1c	37.732	0.523	0.41	0.019	25.907	0.389	34.936	1.109	0.042			0.082	101.148	70.6249					n/a
olv	PM	LAKt24	ol2r	37.294	0.02	0.04	0.019	24.667	0.407	36.865	0.379	0.011			0.085	99.787	72.7113					n/a
olv	PM	LAKt24	ol2r	37.324	0.029	0.07	0.008	24.63	0.419	36.33	0.442	0.019			0.083	99.356	72.4503					n/a
olv	PM	LAKt24	ol2c	37.426	0.019	0.041	0.007	24.679	0.399	36.971	0.355	0.018			0.088	100.003	72.7586					n/a
olv	PM	LAKt25	ol1r	37.239	0.041	0.05	0.009	24.589	0.379	37.226	0.333	0.012			0.098	99.975	72.9668					n/a
olv	PM	LAKt25	ol1	37.696	0.024	0.052	0.021	24.489	0.373	37.071	0.322	0.015			0.095	100.159	72.9649					n/a
olv	PM	LAKt25	ol1	37.426	0.027	0.035	0.007	24.703	0.399	36.961	0.313	0.013			0.081	99.964	72.734					n/a
olv	PM	LAKt25	ol1	37.444	0.019	0.041	0.024	24.859	0.387	36.877	0.299	0.01			0.084	100.045	72.5637					n/a
olv	PM	LAKt25	ol1	37.145	0.02	0.045	0.033	24.884	0.404	36.924	0.292	0.012			0.126	99.886	72.569					n/a
olv	PM	LAKt25	ol1	37.3	0.008	0.044	0.026	24.826	0.387	36.779	0.296	0.006			0.103	99.775	72.5372					n/a
olv	PM	LAKt25	ol1	37.174	0.01	0.033	0.023	24.947	0.389	36.792	0.301	0.006			0.061	99.736	72.4472					n/a
olv	PM	LAKt25	ol1	37.202	0	0.024	0.016	25.036	0.407	36.955	0.285	0.004			0.103	100.032	72.4644					n/a
olv	PM	LAKt25	ol1	37.301	0.007	0.042	0.031	25.098	0.424	36.778	0.288	0.008			0.108	100.086	72.319					n/a
olv	PM	LAKt25	ol1	36.98	0.007	0.044	0.012	25.071	0.39	36.759	0.284	0.02			0.058	99.628	72.3302					n/a
olv	PM	LAKt25	ol1	37.016	0.003	0.044	0.03	25.066	0.425	36.612	0.294	0.021			0.108	99.619	72.2539					n/a
olv	PM	LAKt25	ol1	37.091	0.02	0.053	0.018	25.062	0.414	36.604	0.282	0.013			0.094	99.651	72.2528					n/a
olv	PM	LAKt25	ol1	37.112	0.007	0.038	0.019	25.269	0.429	36.804	0.293	0.004			0.09	100.065	72.1971					n/a
olv	PM	LAKt25	ol1	37.332	0	0.052	0.015	25.099	0.381	36.684	0.278	0.02			0.087	99.95	72.2669					n/a
olv	PM	LAKt25	ol1	37.206	0.013	0.052	0.039	24.965	0.428	36.638	0.28	0.016			0.121	99.758	72.349					n/a
olv	PM	LAKt25	ol1	37.197	0.009	0.05	0.006	25.294	0.416	36.623	0.268	0.015			0.085	99.963	72.0781					n/a
olv	PM	LAKt25	ol1	37.158	0.007	0.023	0	25.082	0.394	36.629	0.277	0.008			0.112	99.689	72.2505					n/a
olv	PM	LAKt25	ol1	36.995	0.002	0.06	0.016	25.341	0.394	36.718	0.273	0.017			0.101	99.915	72.0929					n/a
olv	PM	LAKt25	ol1	37.194	0.008	0.043	0.041	25.113	0.405	36.542	0.283	0.024			0.07	99.724	72.178					n/a
olv	PM	LAKt25	ol1c	36.846	0.005	0.059	0.019	25.1	0.38	36.741	0.293	0.005			0.109	99.559	72.2973					n/a
olv	PM	LAKt25	ol2r	36.787	0.035	0.052	0.021	24.604	0.4	37.355	0.326	0.011			0.106	99.698	73.0229					n/a
olv	PM	LAKt25	ol2	36.646	0.027	0.047	0.021	24.566	0.375	37.015	0.308	0.011			0.115	99.131	72.873					n/a
olv	PM	LAKt25	ol2	37.094	0.026	0.052	0.005	24.944	0.398	36.826	0.297	0.02			0.092	99.752	72.4681					n/a
olv	PM	LAKt25	ol2	37.13	0.025	0.057	0.021	25.063	0.408	36.644	0.306	0.012			0.094	99.759	72.2738					n/a
olv	PM	LAKt25	ol2	37.044	0.025	0.045	0.016	25.364	0.417	36.458	0.309	0.011			0.081	99.77	71.9314					n/a
olv	PM	LAKt25	ol2	36.877	0.021	0.045	0.009	25.343	0.39	36.641	0.307	0.007			0.087	99.726	72.049					n/a
olv	PM	LAKt25	ol2	37.317	0.013	0.057	0.016	25.352	0.423	36.567	0.321	0.024			0.105	100.195	72.0011					n/a
olv	PM	LAKt25	ol2	42.49	0.397	1.461	0.098	20.534	0.356	28.978	6.495	0.13			0.055	100.995	71.5589					n/a
olv	PM	LAKt25	ol2	37.725	0.078	0.296	0.027	24.758	0.377	35.558	1.101	0.027			0.087	100.033	71.9149					n/a
olv	PM	LAKt25	ol2	37.04	0.005	0.044	0.031	25.33	0.375	36.578	0.325	0.004			0.087	99.819	72.0247					n/a
olv	PM	LAKt25	ol2	36.779	0.013	0.039	0.038	25.1	0.406	36.499	0.312	0.017			0.106	99.309	72.1647					n/a
olv	PM	LAKt25	ol2	37.086	0.006	0.041	0.011	25.312	0.424	36.441	0.29	0.008			0.093	99.711	71.9634					n/a
olv	PM	LAKt25	ol2	37.195	0.014	0.039	0.013	25.315	0.404	36.717	0.302	0.015			0.098	100.112	72.113					n/a
olv	PM	LAKt25	ol2	37.124	0.02	0.036	0.014	25.421	0.411	36.766	0.306	0.005			0.11	100.213	72.0557					n/a
olv	PM	LAKt25	ol2c	37.288	0.005	0.059	0.004	25.185	0.396	36.761	0.3	0.025			0.097	100.119	72.2404					n/a
[truncated: 17 more columns]
