# Supplementary material for: Mush Disaggregation in Basaltic Magma Chambers: Evidence from the ad 1783 Laki Eruption
Source: Oxford University Press journal article supplement (doi:10.1093/petrology/egs061), 2012-09-27
Supplement: egs061_Supplementary_Data.zip [file EA6.xls]

## Sheet: Sheet1
Electronic Appendix 6
Results of fits to correlation between whole-rock compositions and individual phenocryst mass proportions or total mass phenocryst proportion.
r is the regression coefficient, c is the intercept at 0% phenocrysts, m is the slope, and sig_c and sig_m are the 1 sigma uncertainties on the intercept and slope.
38 samples in correlation
Plagioclase
	r	c	sig_c	m	sig_m
SiO2	-0.173484	50.308	0.011048	-0.520242	0.138342
Al2O3	0.730311	13.6075	0.015519	3.00084	0.19559
FeOT	-0.757277	13.629	0.009498	-4.17606	0.169411
MgO	0.076963	5.7452	0.006325	0.076079	0.075074
CaO	0.771219	10.2961	0.005263	1.79185	0.077637
Na2O	-0.115449	2.71155	0.005298	-0.13137	0.062887
K2O	-0.620692	0.423637	0.00071	-0.094072	0.008926
TiO2	-0.737035	2.7947	0.002817	-0.88101	0.040503
MnO	-0.61608	0.229159	0.001063	-0.070903	0.012622
P2O5	-0.561013	0.303049	0.000657	-0.081613	0.008065
Nb	-0.728394	20.3228	0.032119	-6.8971	0.411931
Zr	-0.715958	188.454	0.168392	-64.4839	2.70051
Y	-0.741509	41.7561	0.060098	-11.8092	0.762656
Sr	0.539478	231.546	0.148879	39.6684	2.20227
Rb	-0.445456	7.93533	0.053428	-1.51905	0.622326
Zn	-0.526197	131.201	0.360494	-80.3973	4.91197
Cu	-0.065843	111.866	0.716672	-209.543	13.4797
Ni	0.08896	38.2082	0.219478	23.1365	2.75455
Cr	0.452999	52.2432	0.410848	111.077	6.24892
V	-0.616883	404.231	0.888965	-262.939	13.3623
Ba	-0.18679	90.3804	0.938883	-7.5625	10.7131
Sc	-0.453921	44.1317	0.227898	-23.5624	2.89075
La	-0.328896	13.7082	0.066481	-2.91575	0.782025
Ce	-0.333067	34.3158	0.171538	-7.02665	2.0169
Pr	-0.333075	4.8401	0.021356	-1.04163	0.253002
Nd	-0.356187	22.7722	0.138686	-4.88908	1.6235
Sm	-0.316867	6.14132	0.035804	-1.20957	0.418887
Eu	-0.321995	1.99662	0.01026	-0.423242	0.120718
Gd	-0.361812	6.9472	0.030695	-1.5714	0.362798
Tb	-0.36996	1.13459	0.007104	-0.270296	0.083198
Dy	-0.334817	6.93657	0.040222	-1.40321	0.47098
Ho	-0.312802	1.36322	0.006737	-0.269712	0.079379
Er	-0.365209	3.85767	0.023292	-0.867071	0.272359
Tm	-0.358648	0.584945	0.003778	-0.153512	0.044428
Yb	-0.323966	3.44362	0.016128	-0.78893	0.191146
Lu	-0.298352	0.507706	0.002035	-0.119955	0.024614
Olivine
SiO2	0.308679	50.128	0.015622	10.2968	1.21594
Al2O3	0.471493	13.5535	0.023368	19.0071	1.66611
FeOT	-0.606953	13.7649	0.034579	-31.0453	3.1126
MgO	-0.052892	5.77714	0.020566	-1.86071	1.53773
CaO	0.492765	10.2638	0.011584	11.6034	0.955531
Na2O	-0.309538	2.74805	0.006425	-3.21581	0.441014
K2O	-0.200794	0.426329	0.0011	-0.664617	0.077333
TiO2	-0.547592	2.81638	0.006126	-5.80929	0.498368
MnO	-0.393494	0.229698	0.001483	-0.383117	0.09404
P2O5	-0.34338	0.306054	0.000992	-0.612548	0.068873
Nb	-0.382072	20.4518	0.051153	-43.144	3.66339
Zr	-0.403166	136.544	93.9914	4752.4	3392.31
Y	-0.486734	41.944	0.091025	-68.5921	6.16854
Sr	0.195053	239.412	0.608374	-487.824	57.8951
Rb	-0.358667	7.92974	0.058716	-7.07723	3.45272
Zn	-0.259304	135.005	0.839356	-780.62	73.6853
Cu	-0.222932	107.521	0.647079	-689.655	58.2489
Ni	0.070047	35.9211	0.326707	287.217	25.1146
Cr	0.494741	49.1544	0.793513	794.18	65.5868
V	-0.22162	410.49	2.09887	-1980.68	183.013
Ba	-0.235874	90.6261	1.01886	-53.64	58.8309
Sc	-0.212159	44.5821	0.271598	-157.787	18.8234
La	-0.212118	13.7276	0.084264	-15.9963	5.44578
Ce	-0.221695	34.3479	0.214734	-37.4522	13.7476
Pr	-0.210062	4.86014	0.028692	-6.675	1.91382
Nd	-0.201809	22.6992	0.165205	-19.3316	10.161
Sm	-0.241053	6.15046	0.043382	-6.63792	2.69742
Eu	-0.202351	1.99755	0.013101	-2.18394	0.839532
Gd	-0.28022	6.97532	0.039444	-9.87026	2.57456
Tb	-0.233277	1.13281	0.008523	-1.21899	0.526764
Dy	-0.238771	6.93516	0.047957	-6.87972	2.96131
Ho	-0.207009	1.36643	0.008962	-1.57706	0.583595
Er	-0.185045	3.84178	0.028706	-3.22929	1.78245
Tm	-0.311419	0.587188	0.004498	-0.92088	0.283292
Yb	-0.217133	3.4524	0.02142	-4.56991	1.40734
Lu	-0.249979	0.515154	0.002827	-1.14826	0.198112
Clinopyroxene
SiO2	-0.229532	50.4042	0.016695	-3.12675	0.356258
Al2O3	0.796549	13.5161	0.025035	6.63396	0.49051
FeOT	-0.78348	13.7546	0.023373	-8.10188	0.463414
MgO	0.041467	5.74391	0.00991	0.152219	0.207673
CaO	0.832849	10.2485	0.011224	3.75621	0.229098
Na2O	-0.23611	2.73837	0.006297	-0.787104	0.123635
K2O	-0.612074	0.427656	0.001095	-0.242651	0.022418
TiO2	-0.753341	2.83212	0.006505	-2.0826	0.128976
MnO	-0.53879	0.230418	0.001382	-0.142073	0.027778
P2O5	-0.51242	0.306803	0.001054	-0.213456	0.021714
Nb	-0.682373	20.6438	0.063795	-17.7993	1.28821
Zr	-0.723585	191.282	0.443864	-151.274	8.81698
Y	-0.728297	42.1938	0.107232	-27.8088	2.10947
Sr	0.552734	228.543	0.458122	126.277	9.68673
Rb	-0.512197	7.98846	0.06441	-3.63213	1.27747
Zn	-0.456036	138.461	1.13334	-286.412	24.0664
Cu	-0.12687	167.313	16.2943	-1466.89	326.088
Ni	0.100309	34.1891	0.783416	126.953	16.6099
Cr	0.475974	48.5151	0.932039	243.13	18.7149
V	-0.562386	422	3.06278	-791.23	64.6908
Ba	-0.2775	90.8681	1.10845	-23.0425	21.6498
Sc	-0.388476	45.0474	0.329022	-59.2449	6.8295
La	-0.46697	13.9273	0.087717	-9.5732	1.78537
Ce	-0.48361	34.8471	0.223549	-23.1644	4.5427
Pr	-0.480684	4.92508	0.028912	-3.57298	0.590658
Nd	-0.499981	23.0883	0.1742	-14.9501	3.52004
Sm	-0.481018	6.23613	0.045464	-4.06465	0.921017
Eu	-0.483062	2.03117	0.013234	-1.44856	0.267904
Gd	-0.485374	7.05752	0.040761	-4.98638	0.827022
Tb	-0.497729	1.15064	0.00891	-0.792062	0.179353
Dy	-0.463736	7.02406	0.050134	-4.21851	1.00917
Ho	-0.442467	1.38482	0.008863	-0.92016	0.181141
Er	-0.474191	3.90577	0.029161	-2.47638	0.589587
Tm	-0.522467	0.595568	0.004726	-0.484217	0.095498
Yb	-0.47119	3.5134	0.02169	-2.84747	0.449017
Lu	-0.454431	0.519139	0.002876	-0.447859	0.059202
Total solid fraction
SiO2	-0.152866	50.3103	0.012744	-0.303762	0.090006
Al2O3	0.802922	13.5529	0.017733	2.03793	0.123002
FeOT	-0.832843	13.6944	0.011874	-2.58523	0.093153
MgO	0.058007	5.74588	0.0072	0.036751	0.04866
CaO	0.844508	10.2713	0.00639	1.15739	0.047725
Na2O	-0.192162	2.7222	0.005997	-0.150854	0.039884
K2O	-0.636482	0.425244	0.000825	-0.063462	0.00576
TiO2	-0.80227	2.81242	0.003542	-0.601518	0.026741
MnO	-0.632583	0.230298	0.001208	-0.047402	0.008099
P2O5	-0.581458	0.304266	0.000759	-0.053666	0.005156
Nb	-0.75284	20.4586	0.039449	-4.77477	0.280201
Zr	-0.76091	190.066	0.237846	-46.0406	1.86414
Y	-0.789483	41.9698	0.070691	-7.995	0.489274
Sr	0.562595	230.579	0.191843	29.2114	1.51728
Rb	-0.507154	7.97532	0.061109	-1.13366	0.408097
Zn	-0.529559	133.093	0.462159	-58.8698	3.43627
Cu	-0.112659	116.423	1.19084	-144.059	10.449
Ni	0.100432	37.8025	0.224116	15.322	1.46954
Cr	0.51667	51.4642	0.481691	63.8874	3.61706
V	-0.620008	408.89	1.08803	-179.142	8.66566
Ba	-0.243911	90.696	1.07833	-6.51788	7.07546
Sc	-0.453782	44.5444	0.262119	-16.1678	1.87156
La	-0.397524	13.7979	0.075862	-2.27566	0.51216
Ce	-0.406964	34.5413	0.196387	-5.55616	1.32416
Pr	-0.40458	4.87202	0.024323	-0.812171	0.164478
Nd	-0.425203	22.9204	0.158857	-3.80002	1.06228
Sm	-0.397795	6.18437	0.041007	-0.987598	0.273836
Eu	-0.397135	2.01039	0.01166	-0.335946	0.078637
Gd	-0.433609	6.99417	0.035013	-1.2165	0.236758
Tb	-0.437359	1.14245	0.008102	-0.207384	0.054281
Dy	-0.403596	6.98018	0.045988	-1.09846	0.307243
Ho	-0.378165	1.37175	0.00773	-0.212479	0.052123
Er	-0.420535	3.88077	0.02662	-0.649905	0.177931
Tm	-0.447648	0.590219	0.004299	-0.123933	0.028992
Yb	-0.39629	3.46907	0.018393	-0.624656	0.124507
Lu	-0.37786	0.511453	0.002298	-0.094035	0.015683
