# Supplementary material for: Mush Disaggregation in Basaltic Magma Chambers: Evidence from the ad 1783 Laki Eruption
Source: Oxford University Press journal article supplement (doi:10.1093/petrology/egs061), 2012-09-27
Supplement: egs061_Supplementary_Data.zip [file EA7.xls]

## Sheet: Sheet1
Electronic Appendix 7
Results of fits to correlation between phenocryst-corrected whole-rock compositions and total proportion phenocrysts, according to Equation 5 of the main text.
r is the regression coefficient, c is the intercept at 0% phenocrysts, m is the slope, and sig_c and sig_m are the 1 sigma uncertainties on the intercept and slope.
38 samples for correlation
	r	c	sig_c	m	sig_m
SiO2	-0.999068	50.3611	0.219787	-48.5158	1.74082
Al2O3	-0.96211	13.9629	0.091077	-19.4074	0.747682
FeOT	-0.895464	13.5011	0.038346	-6.78322	0.303906
MgO	-0.852163	5.46285	0.060089	-7.54696	0.476214
CaO	-0.991779	10.4146	0.074193	-15.3013	0.579118
Na2O	-0.947746	2.75291	0.009846	-1.74842	0.075446
K2O	-0.784254	0.425935	0.000882	-0.096442	0.006283
TiO2	-0.895404	2.80693	0.004849	-0.91818	0.036131
MnO	-0.901448	0.227822	0.001517	-0.15244	0.010743
P2O5	-0.688613	0.304487	0.000778	-0.070216	0.005397
Nb	-0.774383	20.4633	0.040329	-5.08244	0.285927
Zr	-0.808519	189.787	0.247723	-50.959	1.95333
Y	-0.895953	41.9194	0.089723	-13.2353	0.644626
Sr	-0.965433	236.529	1.05694	-230.565	8.64422
Rb	-0.532952	7.97652	0.061136	-1.21075	0.408744
Zn	-0.723239	130.854	0.575562	-85.8526	4.42058
Cu	-0.258499	111.497	0.738759	-115.981	6.31548
Ni	-0.741119	33.8595	1.10342	-126.66	9.12103
Cr	-0.894954	49.6062	3.66704	-469.611	26.2469
V	-0.889708	402.691	2.4444	-418.622	18.325
Ba	-0.546447	90.8847	1.08073	-16.5907	7.21146
Sc	-0.781853	44.0605	0.311748	-33.7775	2.24495
La	-0.534795	13.8109	0.076578	-3.30421	0.51648
Ce	-0.54204	34.5625	0.197552	-8.06036	1.33487
Pr	-0.582669	4.87688	0.024765	-1.31939	0.168293
Nd	-0.600619	22.9264	0.160201	-6.19144	1.08014
Sm	-0.588808	6.18337	0.041715	-1.72109	0.280691
Eu	-0.933539	2.03869	0.014667	-1.93344	0.105919
Gd	-0.614076	6.99128	0.036326	-2.05386	0.247752
Tb	-0.627899	1.14164	0.00827	-0.359511	0.055725
Dy	-0.600697	6.97342	0.04696	-1.96372	0.316542
Ho	-0.578708	1.37084	0.007945	-0.387	0.053926
Er	-0.603858	3.87648	0.027159	-1.11208	0.183042
Tm	-0.59855	0.589666	0.00438	-0.193454	0.029606
Yb	-0.562249	3.46697	0.018961	-1.02584	0.129485
Lu	-0.540776	0.511319	0.002361	-0.151763	0.016342
